# Supplementary material for: Comparative Clinical Efficacy of the Global Leadership Initiative on Malnutrition (GLIM) and the Patient-Generated Subjective Global Assessment (PG-SGA) in Gastric Cancer Patients
Source: Research Square preprint supplement (doi:10.21203/rs.3.rs-5819018/v1), 2025-08-01

**Table S1** Parameters and Thresholds Used for GLIM Severity Grading in the Present Study

| **Variable** | **Stage 1, moderate malnutrition**  **(met at least one criterion)** | **Stage 2, severe malnutrition**  **(met at least one criterion)** |
| --- | --- | --- |
| Weight loss | 5%–10% loss within 6months or 10%–20% loss over6months | >10% loss within 6 months or >20% loss over 6 months |
| Low body mass index | <70years and<20kg/m²，or  aged 70 years and <22 kg/m ² | <70 years and <18.5 kg/m ², or 70 years and <20 kg/m ² |
| Muscle reduction | Any one of MMC,CC,HGS/W < p5 | Any one of MMC, CC, HGS/W < p15 |
| GLIM:Global Leadership Initiative on Malnutrition, MMC, mid-arm muscle circumference; CC, calf circumference (left calf); HGS/W, body weight-standardized hand grip strength. | | |

**Table S2**  Median survival months in a study population stratified with GLIM grades for

reduced muscle mass assessment

| Muscle evaluation parameters | Normal nutritiona |  | Moderate malnutrition |  | Severe malnutrition |  | P |
| --- | --- | --- | --- | --- | --- | --- | --- |
|  | N（%） | Median (95% confidence interval) | N（%） | Median (95% confidence interval) | N（%） | Median (95% confidence interval) |  |
| No RMM assessment | 1006（77.7） | 77.0（65.2-88.8） | 11（0.8） | NA（未达） | 278（21.5） | 43.0（29.1-56.9） | ＜0.001 |
| MMC | 952（73.5） | 77.0（55.4-98.6） | 48（3.7） | 57．0（23.1-90.9） | 295（22.7） | 47.0（33.1-60.9） | ＜0.001 |
| CC | 936（72.3） | 80.0（59.4-100.6） | 51（3.9） | 57.0（4.6-109.4） | 308（23.8） | 39.0（27.9-50.1） | ＜0.001 |
| HGS/W | 863（66.6） | 78.0（62.2-93.8） | 108（8.3） | 81.0（34.0-128.0） | 324（25.1） | 43.0（29.1-56.9） | ＜0.001 |
| MMC or HGS/W,either positive | 823（63.6） | 78.0（53.6-102.4） | 137（10.6） | 80.0（54.2-105.8） | 335（25.8） | 43.0（29.1-56.9） | ＜0.001 |
| MMC and HGS/W,both positive | 991（76.5） | 77.0（62.1-91.9） | 16（1.2） | 80.0（26.2-131.3） | 288（22.3） | 39.0（26.8-51.2） | ＜0.001 |
| CC or HGS/W,either positive | 808（62.4） | 80.0（58.2-101.8） | 138（10.7） | 77.0（36.5-117.5） | 349（26.9） | 39.0（27.1-50.9） | ＜0.001 |
| CC andHGS/W,both positive | 992（76.6） | 77.0（62.1-91.9） | 17（1.3） | NA | 286（22.1） | 39.0（26.9-51.1） | ＜0.001 |
| MMC or CC or HGS/W,any positive | 777（60.0） | 83.0（61.6-104.4） | 158（12.2） | 77.0（50.0-104.0） | 360（27.8） | 39.0（27.4-50.6） | ＜0.001 |
| MMC,CC and HGS/W,all positive | 998（77.1） | 77.0（62.1-92.0） | 13（1.0） | NA | 284（21.9） | 39.0（26.9-51.1） | ＜0.001 |

**Table S3** Number of people with nutritional status diagnosed by PG-SGA standard

| Group | Number |
| --- | --- |
| Normal nutritiona | 82 |
| Mild malnutrition | 200 |
| Moderate malnutrition | 513 |
| Severe malnutrition | 500 |
| Total | 1295 |

**Table S4** Number of people with nutritional status diagnosed by GLIM standard

| Group | Number |
| --- | --- |
| Normal nutritiona | 777 |
| Moderate malnutrition | 148 |
| Severe malnutrition | 370 |
| Total | 1295 |

**Table S5** Malnutrition diagnosed by albumin levels

| **Group** | **Number of Patients** | **Median Overall Survival (months)** | **95% CI** | **P-value** |
| --- | --- | --- | --- | --- |
| Normal | 777 | NA | 61.6-104.4 | <0.001 |
| Malnutrition | 518 | 47.0 | 38.7-55.3 | <0.001 |
| Total | 1282 | 66.0 | 58.0-74.2 |  |

**Table S6** Inter-Rater Agreement for Albumin and PG-SGA in diagnosing malnutrition

| **PG-SGA Diagnosis of Malnutrition** | **Albumin Diagnosis of Malnutrition** | | **Total n (%)** | Kappa | |
| --- | --- | --- | --- | --- | --- |
| Normal | Malnutrition |  | 0.073 | ＜0.001 |
| Normal | 44 | 38 | 82（6.4） |  |  |
| Malnutrition | 383 | 817 | 1200（93.6） |  |  |
| **Total n (%)** | 427（33.3） | 855（66.7） | 1282 |  |  |

**Table S7**Inter-Rater Agreement for Albumin and GLIM in diagnosing malnutrition

| **GLIM Diagnosis of Malnutrition** | **Albumin Diagnosis of Malnutrition** | | **Total n (%)** | Kappa | |
| --- | --- | --- | --- | --- | --- |
| Normal | Malnutrition |  | 0.119 | ＜0.001 |
| Normal | 298 | 474 | 772（60.2） |  |  |
| Malnutrition | 129 | 381 | 510（39.8） |  |  |
| **Total n (%)** | 427（10.1） | 855（29.7） | 1282 |  |  |

**Figure S1** 5-year survival prediction plot


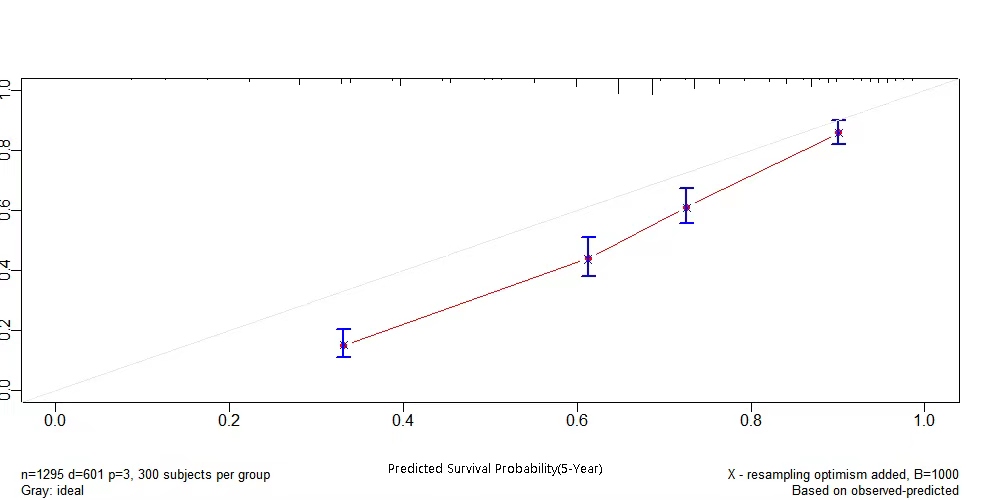


**Figure S2** 3-year survival prediction plot


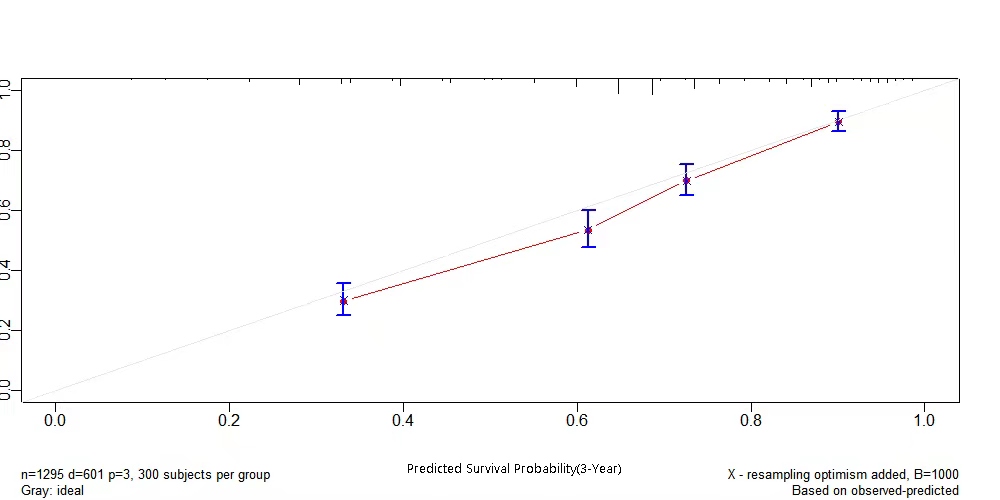


**Figure S3** LASSO analysis plot


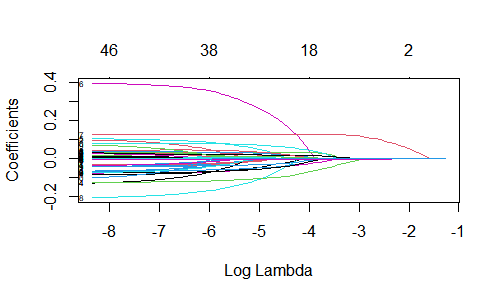

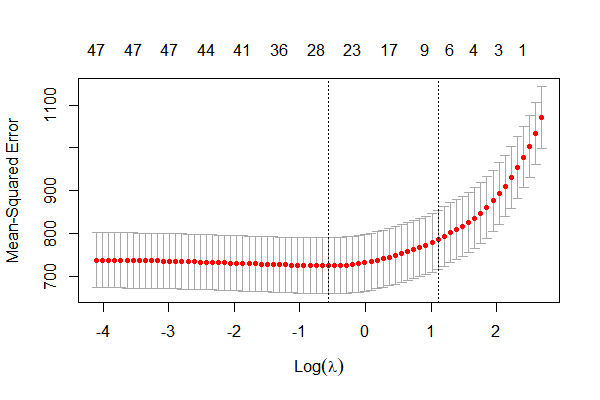

Supplement: Supplementary file 2 [file 7b4fe0494262e7ee16fbd7f4.docx]
