# Supplementary material for: Comparative Clinical Efficacy of the Global Leadership Initiative on Malnutrition (GLIM) and the Patient-Generated Subjective Global Assessment (PG-SGA) in Gastric Cancer Patients
Source: Research Square preprint supplement (doi:10.21203/rs.3.rs-5819018/v1), 2025-08-01
Supplement: Supplementary file 3 [file 8408bbee6a52d861e61322e3.xlsx]

## Sheet: Sheet1
录入日期	调查号	性别	绝经方式	出生日期	医院名称	科室	入院日期	生存状态备注信息	肝硬化	慢性肝炎	中风	COPD	心肌梗塞	接受透析治疗	糖尿病	高血压	冠心病	贫血	甲亢	甲低	慢性胰腺炎	骨质疏松	溃疡性结肠炎	肠道克罗恩病	慢性胆道系统疾病	慢性肾病	结核	系统性红斑狼疮	无	肿瘤家族史	在您的一生中，累计吸烟是否超过5包（2支包）	平均每周（7天）吸烟	持续年数	患者目前为	过去一年是否规律饮酒	平均每周（7天）饮酒次数	白酒	蒸酒	啤酒	米酒	果酒	啤酒（斤周）	葡萄酒黄酒（斤周）	高度白酒（两周）	饮酒持续年数	在您过去的一年中是否经常喝茶叶茶	平均每周（7天）泡茶次数	绿茶	红茶
2018-02-06 13:18:52	100900197	2		1959-12-16	首都医科大学附属北京世纪坛医院	结直肠肿瘤外科	2018-01-15	-1	0	0	0	0	0	0	0	0	0	0	0	0	0	0	0	0	0	0	0	0	1	0	0	0	0	4	0	0						0	0	0	0	0	0
2016-05-13 15:16:35	1300200071	2		1971-08-20	福建省肿瘤医院	干部保健特需病房	2014-03-26		0	0	0	0	0	0	0	0	0	0	0	0	0	0	0	0	0	0	0	0	0	0	0	0	0		0	0						0	0	0	0	0	0
2016-12-12 10:43:53	2800400158	2	1	1958-09-15	广西医科大学一附院	胃肠腺体外科	2015-12-12	-1	0	0	0	0	0	0	0	1	0	0	0	0	0	0	0	0	0	0	0	0	0	0	0	0	0	-1	0	0						0	0	0	0	0	0
2016-08-19 09:15:47	400101444	1		1960-06-28	重庆大坪医院	胃结直肠外科	2016-05-25		0	0	0	0	0	0	0	0	0	0	0	0	0	0	0	0	0	0	0	0	0	0	0	0	0	-1	0	0						0	0	0	0	0	0
2017-01-20 16:13:17	2400100106	1		1959-11-01	西京医院	胃肠外科	2016-10-01	-1	0	0	0	0	0	0	0	0	0	0	0	0	0	0	0	0	0	0	0	0	1	1	0	0	0	-1	0	3	1		1			0	0	3	0	1	7	1
2019-12-16 17:55:03	400104005	1		1973-11-07	重庆大坪医院	胃结直肠外科	2019-09-06	-1	0	1	0	0	0	0	1	0	0	0	0	0	0	0	0	0	0	0	0	0	0	0	0	0	0	4	0	0						0	0	0	0	1	5	1
2019-03-22 08:33:19	400103379	1		1958-06-12	重庆大坪医院	胃结直肠外科	2019-01-21	-1	0	0	0	0	0	0	1	1	0	0	0	0	0	0	0	0	1	0	0	0	0	0	0	0	0	4	0	0						0	0	0	0	0	0
2017-01-23 11:10:45	2400100126	1		1964-06-12	西京医院	胃肠外科	2016-08-19	-1	0	0	0	0	0	0	0	0	0	0	0	0	0	0	0	0	0	0	0	0	1	0	0	0	0	-1	0	0						0	0	0	0	0	0
2015-03-19 10:18:46	300100093	2		1950-10-14	上海瑞金医院	外科一病区	2014-10-20	-1	0	0	0	0	0	0	0	0	0	0	0	0	0	0	0	0	0	0	0	0	0	1	0	0	0		0	0						0	0	0	0	0	0
2017-03-02 11:25:23	2400100227	1		1969-01-28	西京医院	胃肠外科	2016-10-30	-1	0	0	0	0	0	0	0	0	0	0	0	0	0	0	0	0	0	0	0	0	1	0	0	0	0	4	0	0						0	0	0	0	0	0
2017-02-24 11:04:34	2400100188	2		1953-05-07	西京医院	胃肠外科	2016-07-04	-1	0	0	0	0	0	0	0	1	0	0	0	0	0	0	0	0	0	0	0	0	0	0	0	0	0	4	0	0						0	0	0	0	0	0
2017-03-14 18:49:48	2400100287	1		1962-08-29	西京医院	胃肠外科	2017-02-07	-1	0	0	0	0	0	0	0	0	0	0	0	0	0	0	0	0	0	0	0	0	1	0	0	0	0	4	0	0						0	0	0	0	0	0
2017-01-22 16:27:33	2400100117	1		1972-09-19	西京医院	胃肠外科	2016-09-05	-1	0	0	0	0	0	0	0	0	0	0	0	0	0	0	0	0	0	0	0	0	1	0	0	0	0	-1	0	0						0	0	0	0	0	0
2017-03-02 08:31:42	2400100219	1		1949-11-08	西京医院	胃肠外科	2015-11-29	-1	0	0	0	0	0	0	0	0	0	0	0	0	0	0	0	0	0	0	0	0	0	0	0	0	0	4	0	7	1					0	0	21	0	1	7		1
2016-05-13 15:20:27	1300200104	1		1948-09-04	福建省肿瘤医院	二区 胸部肿瘤外科	2014-03-27		0	0	0	0	0	0	0	0	0	0	0	0	0	0	0	0	0	0	0	0	0	0	0	0	0		0	0						0	0	0	0	0	0
2019-04-23 21:35:57	2200100938	1		1964-12-28	贵州省遵义市医学院附属肿瘤医院（一附院）	头颈肿瘤科	2019-04-10	-1	0	0	0	0	0	0	0	0	0	0	0	0	0	0	0	0	0	0	0	0	1	0	0	0	0	4	0	0						0	0	0	0	0	0
2015-03-20 16:29:00	2100101109	1		1955-04-15	四川大学华西医院	肿瘤二	2014-09-15	-1	0	0	0	0	0	0	0	0	0	0	0	0	0	0	0	0	0	0	0	0	0	0	0	0	0		0	0						0	0	0	0	0	0
2016-05-03 10:09:10	1300200219	1		1961-04-09	福建省肿瘤医院	干部保健特需病房	2014-05-12		0	0	0	0	0	0	0	0	0	0	0	0	0	0	0	0	0	0	0	0	0	0	0	0	0		0	0						0	0	0	0	0	0
2018-08-31 18:16:36	2300102257	1		1963-02-28	昆明医科大学第一附属医院	肿瘤外科	2018-08-13	-1	0	0	0	0	0	0	0	0	0	0	0	0	0	0	0	0	0	0	0	0	1	0	0	0	0	4	0	0						0	0	0	0	0	0
2018-09-09 17:12:12	2300102282	1		1972-08-22	昆明医科大学第一附属医院	肿瘤外科	2018-08-22	-1	0	0	0	0	0	0	0	0	0	0	0	0	0	0	0	0	0	0	0	0	1	0	0	0	0	4	0	0						0	0	0	0	0	0
2018-08-30 17:23:27	2300102252	2		1970-10-18	昆明医科大学第一附属医院	肿瘤外科	2018-08-13	-1	0	0	0	0	0	0	0	0	0	0	0	0	0	0	0	0	0	0	0	0	1	0	0	0	0	4	0	0						0	0	0	0	0	0
2018-08-13 11:31:06	2300102200	2		1983-06-06	昆明医科大学第一附属医院	肿瘤外科	2018-06-06	-1	0	0	0	0	0	0	0	0	0	0	0	0	0	0	0	0	0	0	0	0	1	1	0	0	0	4	0	0						0	0	0	0	1	3	1
2014-01-26 16:01:26	800100132	2		1974-09-30	吉林大学白求恩第一医院	肿瘤中心	2013-07-08		0	0	0	0	0	0	0	0	0	0	1	0	0	0	0	0	0	0	0	0	0	0	0	0	0	-1	0	0						0	0	0	0	0	0
2019-01-11 09:01:45	400103204	2	1	1953-03-26	重庆大坪医院	胃结直肠外科	2018-11-13	-1	0	0	0	0	0	0	0	0	0	0	0	0	0	0	0	0	0	0	0	0	1	0	0	0	0	4	0	0						0	0	0	0	0	0
2018-11-08 10:28:39	2300102444	2		1962-03-10	昆明医科大学第一附属医院	肿瘤外科	2018-10-18	-1	0	0	0	0	0	0	0	0	0	0	0	0	0	0	0	0	0	0	0	0	1	0	0	0	0	4	0	0						0	0	0	0	0	0
2018-11-08 10:45:51	2300102446	1		1975-12-02	昆明医科大学第一附属医院	肿瘤外科	2018-10-19	-1	0	0	0	0	0	0	0	0	0	0	0	0	0	0	0	0	0	0	0	0	1	0	0	0	0	4	0	0						0	0	0	0	0	0
2016-05-10 16:07:29	1300200823	1		1955-01-02	福建省肿瘤医院	干部保健特需病房	2015-03-18		0	0	0	0	0	0	0	1	0	0	0	0	0	0	0	0	0	0	0	0	0	0	0	0	0		1	7				1		0	0	14	0	0	0
2016-05-10 10:33:04	1300200738	2		1951-05-12	福建省肿瘤医院	干部保健特需病房	2015-01-07		0	0	0	0	0	0	0	1	0	0	0	0	0	0	0	0	0	0	0	0	0	0	0	0	0		0	0						0	0	0	0	1	7	1
2016-05-16 15:09:59	1900101328	2		1962-04-01	中山大学第一附属医院	胃肠外科	2015-05-04		0	0	0	0	0	0	0	0	0	0	0	0	0	0	0	0	0	0	0	0	0	1	0	0	0		0	0						0	0	0	0	0	0
2018-12-06 18:44:00	400103009	1		1960-02-02	重庆大坪医院	心外科	2018-06-22	-1	0	0	0	0	0	0	0	0	0	0	0	0	0	0	0	0	0	0	0	0	1	0	0	0	0	4	1	4	1					0	0	6	0	0	0
2016-03-21 12:08:26	400200376	2		1950-11-25	重庆市第三人民医院	普外科	2016-02-24	-1	0	0	0	0	0	0	0	0	0	0	0	0	0	0	0	0	0	0	0	0	0	0	0	0	0	-1	0	0						0	0	0	0	0	0
2015-10-15 09:46:28	400200219	2		1952-01-30	重庆市第三人民医院	泌尿外科	2015-08-26	-1	0	0	0	0	0	0	0	1	0	0	0	0	0	0	0	0	0	0	0	0	0	0	0	0	0	-1	0	0						0	0	0	0	0	0
2014-01-18 15:00:09	2800100091	1		1964-10-07	广西医科大学附属肿瘤医院	胃肠一区	2013-05-15	-1	0	0	0	0	0	0	0	0	0	0	0	0	0	0	0	0	0	0	0	0	0	0	0	0	0	-1	0	0						0	0	0	0	0	0
2016-05-13 10:07:54	1300200454	2		1969-04-25	福建省肿瘤医院	七区 胃肠肿瘤外科	2014-06-30		0	0	0	0	0	0	0	0	0	0	0	0	0	0	0	0	0	0	0	0	0	1	0	0	0		0	0						0	0	0	0	0	0
2016-05-06 11:29:05	1300200491	2		1960-07-03	福建省肿瘤医院	七区 胃肠肿瘤外科	2014-07-10		0	0	0	0	0	0	0	0	0	0	0	0	0	0	0	0	0	0	0	0	0	0	0	0	0		0	0						0	0	0	0	0	0
2016-05-06 11:27:08	1300200496	2		1950-04-29	福建省肿瘤医院	七区 胃肠肿瘤外科	2014-07-15		0	0	0	0	0	0	0	0	0	0	0	0	0	0	0	0	0	0	0	0	0	0	0	0	0		0	0						0	0	0	0	0	0
2016-05-10 10:27:40	1300200732	2		1961-09-17	福建省肿瘤医院	七区 胃肠肿瘤外科	2014-08-01		0	0	0	0	0	0	0	0	0	0	0	0	0	0	0	0	0	0	0	0	0	0	0	0	0		0	0						0	0	0	0	0	0
2014-01-24 20:28:39	2800100279	1		1964-08-27	广西医科大学附属肿瘤医院	胃肠一区	2013-11-18	-1	0	1	0	0	0	0	0	0	0	0	0	0	0	0	0	0	0	0	0	0	0	0	0	0	0	-1	0	0						0	0	0	0	0	0
2014-01-27 18:49:42	800100154	2		1941-07-09	吉林大学白求恩第一医院	肿瘤中心	2013-06-03		0	0	0	0	0	0	0	0	0	0	0	0	0	0	0	0	0	0	0	0	0	0	0	0	0	-1	0	0						0	0	0	0	0	0
2016-05-06 11:23:44	1300200492	1		1954-01-20	福建省肿瘤医院	七区 胃肠肿瘤外科	2014-07-18		0	0	0	0	0	0	0	0	0	0	0	0	0	0	0	0	0	0	0	0	0	0	0	0	0		0	0						0	0	0	0	0	0
2014-02-25 16:18:04	800100288	1		1969-03-23	吉林大学白求恩第一医院	肿瘤中心	2013-11-28	-1	0	0	0	0	0	0	0	0	0	0	0	0	0	0	0	0	0	0	0	0	0	0	0	0	0	-1	0	0						0	0	0	0	0	0
2016-08-09 16:49:01	900200253	2		1955-04-19	哈医大四院	肿瘤内科	2016-07-18		0	0	0	0	0	0	0	0	0	0	0	0	0	0	0	0	0	0	0	0	1	0	0	0	0		0	0						0	0	0	0	0	0
2016-05-15 20:22:30	500200089	1		1955-05-28	承德市医学院附属医院	肿瘤科	2013-08-13	-1	0	0	0	0	0	0	0	0	0	0	0	0	0	0	0	0	0	0	0	0	0	0	0	0	0		0	0						0	0	0	0	0	0
2015-03-19 10:25:15	300100013	2		1963-05-11	上海瑞金医院	外科三病区	2014-09-04	-1	0	0	0	0	0	0	0	0	0	0	0	0	0	0	0	0	0	0	0	0	0	0	0	0	0		0	0						0	0	0	0	0	0
2015-03-19 10:09:10	300100015	2		1957-04-04	上海瑞金医院	外科三病区	2014-09-03	-1	0	0	0	0	0	0	1	0	0	0	0	0	0	0	0	0	0	0	0	0	0	0	0	0	0		0	0						0	0	0	0	0	0
2015-03-19 09:53:19	300100023	1		1957-07-29	上海瑞金医院	外科三病区	2014-09-07	-1	0	0	0	0	0	0	0	1	0	0	0	0	0	0	0	0	0	0	0	0	0	0	0	0	0		0	0						0	0	0	0	0	0
2015-06-10 10:56:00	2400100056	2		1971-10-20	西京医院	胃肠外科	2014-10-28	-1	0	0	0	0	0	0	0	0	0	0	0	0	0	0	0	0	0	0	0	0	1	0	0	0	0	-1	0	0						0	0	0	0	0	0
2015-06-10 11:36:12	2400100058	2		1971-02-25	西京医院	胃肠外科	2014-10-29	-1	0	0	0	0	0	0	0	0	0	0	0	0	0	0	0	0	0	0	0	0	1	0	0	0	0	-1	0	0						0	0	0	0	0	0
2014-02-28 20:26:37	800100704	2		1973-07-25	吉林大学白求恩第一医院	肿瘤中心	2013-07-01		0	0	0	0	0	0	0	0	0	1	0	0	0	0	0	0	0	0	0	0	0	1	0	0	0	-1	0	0						0	0	0	0	0	0
2014-11-17 19:01:50	2800100658	1		1963-09-05	广西医科大学附属肿瘤医院	胃肠二区	2014-11-17	-1	0	0	0	0	0	0	0	0	0	0	0	0	0	0	0	0	0	0	0	0	0	0	0	0	0	-1	0	0						0	0	0	0	0	0
2015-03-11 14:56:51	300100135	2		1971-01-01	上海瑞金医院	外科三病区	2014-11-17	-1	0	0	0	0	0	0	0	0	0	0	0	0	0	0	0	0	0	0	0	0	0	0	0	0	0		0	0						0	0	0	0	1	7	1
2015-04-07 16:45:28	2400100034	2		1953-12-29	西京医院	胃肠外科	2014-11-01	-1	0	0	0	0	0	0	0	0	0	0	0	0	0	0	0	0	0	0	0	0	1	0	0	0	0	-1	0	0						0	0	0	0	0	0
2015-03-31 11:13:17	2400100030	2		1963-04-22	西京医院	胃肠外科	2014-11-25	-1	0	0	0	0	0	0	0	1	0	0	0	0	0	0	0	0	0	0	0	0	0	0	0	0	0	-1	0	0						0	0	0	0	0	0
2015-04-10 08:55:07	2400100040	1		1972-06-10	西京医院	胃肠外科	2014-11-05	-1	0	0	0	0	0	0	0	0	0	0	0	0	0	0	0	0	0	0	0	0	0	0	0	0	0	-1	1	3	1					0	0	2	0	0	0
2014-03-02 19:04:25	800100876	1		1973-02-01	吉林大学白求恩第一医院	肿瘤中心	2014-01-17	-1	0	0	0	0	0	0	0	0	0	0	0	0	0	0	0	0	0	0	0	0	0	0	0	0	0	-1	0	0						0	0	0	0	0	0
2014-04-26 17:13:28	800101273	1		1950-12-08	吉林大学白求恩第一医院	肿瘤中心	2014-03-25		0	0	0	0	0	0	0	0	0	0	0	0	0	0	0	0	0	0	0	0	0	0	0	0	0	-1	0	0						0	0	0	0	0	0
2015-03-11 15:51:04	300100175	1		1947-02-17	上海瑞金医院	外科四病区	2014-12-02	-1	0	0	0	0	0	0	0	1	0	0	0	0	0	0	0	0	0	0	0	0	0	0	0	0	0		0	0						0	0	0	0	1	7	1
2015-05-04 16:18:17	2400100020	1		1960-05-10	西京医院	胃肠外科	2014-12-17	-1	0	0	0	0	0	0	0	0	0	0	0	0	0	0	0	0	1	0	0	0	1	0	0	0	0	-1	0	0						0	0	0	0	1	7	1	1
2015-06-11 11:23:59	2400100060	1		1947-01-23	西京医院	胃肠外科	2014-12-24	-1	0	0	0	0	0	0	0	0	0	0	0	0	0	0	0	0	0	0	0	0	0	1	0	0	0	-1	0	0						0	0	0	0	1	7	1
2015-03-11 15:15:35	300100160	1		2014-12-15	上海瑞金医院	外科三病区	2014-11-27	-1	0	0	0	0	0	0	0	0	0	0	0	0	0	0	0	0	0	0	0	0	0	0	0	0	0		0	0						0	0	0	0	0	0
2014-12-30 18:37:12	400100335	2		1957-10-24	重庆大坪医院	胃结直肠外科	2014-12-15	-1	0	0	0	0	0	0	0	0	0	0	0	0	0	0	0	0	0	0	0	0	0	0	0	0	0	-1	0	0						0	0	0	0	0	0
2016-05-12 21:19:13	2800400030	1		1957-07-21	广西医科大学一附院	胃肠腺体外科	2015-05-27	-1	0	0	0	0	0	0	1	0	0	0	0	0	0	0	0	0	0	0	0	0	0	0	0	0	0	-1	1	7				1		0	3	0	0	1	7	1	1
2016-03-22 19:39:08	400100793	1		1969-02-28	重庆大坪医院	消化科	2015-06-08		0	1	0	0	0	0	1	0	0	0	0	0	0	0	0	0	0	0	0	0	0	0	0	0	0	-1	0	0						0	0	0	0	0	0
2015-09-29 16:55:41	2400100080	1		1953-02-23	西京医院	胃肠外科	2015-09-16	-1	0	0	0	0	0	0	0	0	0	0	0	0	0	0	0	0	0	0	0	0	0	0	0	0	0	-1	0	0						0	0	0	0	0	0
2015-04-10 08:22:26	2400100038	2		1954-10-15	西京医院	胃肠外科	2014-11-10	-1	0	0	0	0	0	0	0	0	0	0	0	0	0	0	0	0	0	0	0	0	0	0	0	0	0	-1	0	0						0	0	0	0	0	0
2014-08-23 09:59:03	800102446	1		1971-03-23	吉林大学白求恩第一医院	胃肠外科	2014-06-15		0	0	0	0	0	0	0	0	0	0	0	0	0	0	0	0	0	0	0	0	0	0	0	0	0	-1	0	0						0	0	0	0	0	0
2015-10-02 19:35:34	1200100334	1		1949-12-05	安徽省肿瘤医院	肿三	2015-08-04	-1	0	0	0	0	0	0	0	0	1	0	0	0	0	0	0	0	0	0	0	0	0	0	0	0	0	-1	0	0						0	0	0	0	0	0
2016-05-07 14:32:49	800101514	1		1967-06-15	吉林大学白求恩第一医院	肿瘤中心	2014-03-18	-1	0	0	0	0	0	0	0	1	0	0	0	0	0	0	0	0	0	0	0	0	0	1	0	0	0	-1	0	0						0	0	0	0	0	0
2014-11-12 10:33:39	800102684	2		1948-10-14	吉林大学白求恩第一医院	胃肠外科	2014-08-14		0	0	0	0	0	0	0	0	0	0	0	0	0	0	0	0	0	0	0	0	0	1	0	0	0	-1	0	0						0	0	0	0	0	0
2016-05-14 10:12:33	800103267	1		1953-12-24	吉林大学白求恩第一医院	胃肠外科	2014-09-25	-1	0	0	0	0	0	0	0	0	0	0	0	0	0	0	0	0	0	0	0	0	0	0	0	0	0	-1	0	0						0	0	0	0	0	0
2014-02-26 14:23:32	800100435	2		1953-08-05	吉林大学白求恩第一医院	肿瘤中心	2013-11-03		0	0	0	0	0	0	0	0	0	0	0	0	0	0	0	0	0	0	0	0	0	0	0	0	0	-1	0	0						0	0	0	0	0	0
2014-06-17 20:53:13	800101838	1		1944-04-12	吉林大学白求恩第一医院	胃肠外科	2014-04-25	-1	0	0	0	0	0	0	0	0	1	0	0	0	0	0	0	0	1	0	0	0	0	0	0	0	0	-1	0	0						0	0	0	0	0	0
2014-12-04 18:24:24	800102801	2		1982-01-07	吉林大学白求恩第一医院	肿瘤中心	2014-10-20	-1	0	0	0	0	0	0	0	0	0	1	0	0	0	0	0	0	0	0	0	0	0	0	0	0	0	-1	0	0						0	0	0	0	0	0
2015-04-12 23:14:57	800103500	1		1958-11-24	吉林大学白求恩第一医院	胃肠外科	2015-01-08	-1	0	0	0	0	0	0	0	0	0	0	0	0	0	0	0	0	0	0	0	0	0	0	0	0	0	-1	0	0						0	0	0	0	1	7	1
2016-05-11 10:00:52	1300200928	2		1951-06-04	福建省肿瘤医院	干部保健特需病房	2015-07-01		0	0	0	0	0	0	0	0	0	0	0	0	0	0	0	0	0	0	0	0	0	0	0	0	0		0	0						0	0	0	0	0	0
2017-02-28 10:46:35	2400100210	1		1974-03-14	西京医院	胃肠外科	2016-05-01	-1	0	0	0	0	0	0	0	0	0	0	0	0	0	0	0	0	0	0	0	0	0	0	0	0	0	4	0	0						0	0	0	0	0	0
2015-02-03 20:48:56	800103178	2		1965-02-04	吉林大学白求恩第一医院	胃肠外科	2014-08-07		0	0	0	0	0	0	0	0	0	0	0	0	0	0	0	0	0	0	0	0	0	0	0	0	0	-1	0	0						0	0	0	0	0	0
2014-12-31 17:35:22	400100330	2		1958-01-07	重庆大坪医院	胃结直肠外科	2014-12-04	-1	0	0	0	0	0	0	0	0	0	0	0	0	0	0	0	0	0	0	0	0	0	0	0	0	0	-1	0	0						0	0	0	0	0	0
2015-07-14 21:02:43	800103779	2		1962-09-01	吉林大学白求恩第一医院	胃肠外科	2015-03-24		0	0	0	0	0	0	0	0	0	0	1	0	0	0	0	0	0	0	0	0	0	1	0	0	0	-1	0	0						0	0	0	0	0	0
2014-02-26 10:33:32	800100344	1		1953-03-27	吉林大学白求恩第一医院	肿瘤中心	2013-12-16		0	0	0	0	0	0	1	0	0	0	0	0	0	0	0	0	0	0	0	0	0	0	0	0	0	-1	0	0						0	0	0	0	0	0
2016-04-26 15:31:06	1200100847	2		1965-04-20	安徽省肿瘤医院	肿三	2016-04-18	-1	0	0	0	0	0	0	0	0	0	0	0	0	0	0	0	0	0	0	0	0	0	0	0	0	0	-1	0	0						0	0	0	0	0	0
2015-08-29 15:18:48	800104255	1		1948-05-05	吉林大学白求恩第一医院	胃肠外科	2015-05-16		0	0	0	0	0	0	0	1	0	0	0	0	0	0	0	0	0	0	0	0	0	0	0	0	0	-1	0	0						0	0	0	0	0	0
2015-09-24 15:25:45	800104804	1		1949-09-05	吉林大学白求恩第一医院	胃肠外科	2015-05-31		0	0	0	0	0	0	1	0	0	0	0	0	0	0	0	0	0	0	0	0	0	0	0	0	0	-1	0	0						0	0	0	0	0	0
2017-01-22 11:22:56	2400100113	1		1964-02-29	西京医院	胃肠外科	2016-05-14	-1	0	0	0	0	0	0	0	0	0	0	0	0	0	0	0	0	0	0	0	0	0	0	0	0	0	-1	0	0						0	0	0	0	1	7	1	1
2017-01-22 15:43:52	2400100115	2		1964-08-18	西京医院	胃肠外科	2016-05-30	-1	0	0	0	0	0	0	0	0	0	0	0	0	0	0	0	0	0	0	0	0	1	0	0	0	0	-1	0	0						0	0	0	0	0	0
2016-05-09 09:50:06	1300200580	2		1948-02-03	福建省肿瘤医院	干部保健特需病房	2014-09-15		0	0	0	0	0	0	0	0	0	0	0	0	0	0	0	0	0	0	0	0	0	1	0	0	0		0	0						0	0	0	0	1	10		1
2014-04-17 13:44:23	800101192	2		1950-02-20	吉林大学白求恩第一医院	肿瘤中心	2014-02-26		0	0	0	0	0	0	0	0	0	0	0	0	0	0	0	0	0	0	0	0	0	1	0	0	0	-1	0	0						0	0	0	0	1	7	1	1
2015-07-30 01:47:06	800103956	1		1952-04-01	吉林大学白求恩第一医院	胃肠外科	2015-06-01		0	0	0	0	0	0	0	0	0	0	0	0	0	0	0	0	0	0	0	0	0	0	0	0	0	-1	1	21	1					0	0	70	0	0	0
2015-08-07 08:59:20	800104226	2		1965-02-20	吉林大学白求恩第一医院	胃肠外科	2015-07-03		0	0	0	0	0	0	0	0	0	0	0	0	0	0	0	0	0	0	0	0	0	0	0	0	0	-1	0	0						0	0	0	0	0	0
2015-09-28 18:54:10	800104821	1		1958-04-27	吉林大学白求恩第一医院	胃肠外科	2015-07-07		0	0	0	0	0	0	0	1	0	0	0	0	0	0	0	0	0	0	0	0	0	1	0	0	0	-1	1	14	1					0	0	28	0	0	0
2017-02-04 09:38:29	2400100140	2		1964-08-23	西京医院	胃肠外科	2016-08-03	-1	0	0	0	0	0	0	0	0	0	0	0	0	0	0	0	0	0	0	0	0	0	1	0	0	0	-1	0	0						0	0	0	0	0	0
2017-02-07 10:45:34	2400100163	1		1966-07-29	西京医院	胃肠外科	2016-07-24	-1	0	0	0	0	0	0	0	0	0	0	0	0	0	0	1	0	0	0	0	0	0	0	0	0	0	-1	0	0						0	0	0	0	1	7	1
2017-02-23 16:51:10	2400100179	1		1957-01-02	西京医院	胃肠外科	2016-07-18	-1	0	0	0	0	0	0	0	0	0	0	0	0	0	0	0	0	0	0	0	0	1	1	0	0	0	4	1	2	1					0	0	1	0	0	0
2016-05-13 15:08:18	1300200019	1		1968-11-24	福建省肿瘤医院	干部保健特需病房	2014-02-18		0	0	0	0	0	0	0	0	0	0	0	0	0	0	0	0	0	0	0	0	0	0	0	0	0		0	0						0	0	0	0	0	0
2016-05-10 09:20:14	1300200662	1		1957-09-30	福建省肿瘤医院	干部保健特需病房	2014-11-16		0	0	0	0	0	0	0	0	0	0	0	0	0	0	0	0	0	0	0	0	0	0	0	0	0		0	0						0	0	0	0	0	0
2017-02-04 11:26:35	2400100147	2	2	1956-01-15	西京医院	胃肠外科	2016-08-07	-1	0	0	0	0	0	0	0	0	0	0	0	0	0	0	0	0	0	0	0	0	0	1	0	0	0	-1	0	0						0	0	0	0	0	0
2015-10-30 12:07:00	800104973	1		1963-04-12	吉林大学白求恩第一医院	胃肠外科	2015-08-11		0	0	0	0	0	0	0	0	0	0	0	0	0	0	0	0	0	0	0	0	0	0	0	0	0	-1	0	0						0	0	0	0	1	4	1	1
2016-03-25 15:15:07	800105247	2		1958-10-10	吉林大学白求恩第一医院	胃肠外科	2015-08-03	-1	0	0	0	0	0	0	0	0	0	0	0	0	0	0	0	0	0	0	0	0	0	1	0	0	0	-1	0	0						0	0	0	0	0	0
2016-05-13 09:54:16	2300100285	2		1949-10-24	昆明医科大学第一附属医院	普外一科（胃肠与疝外科）	2015-08-18	-1	0	0	0	0	0	0	0	0	0	0	0	0	0	0	0	0	0	0	0	0	0	0	0	0	0	-1	0	0						0	0	0	0	0	0
2017-01-10 09:10:28	2400100096	1		1967-02-19	西京医院	胃肠外科	2016-09-06	-1	0	0	1	0	0	0	0	0	0	0	0	0	0	0	0	0	0	0	0	0	0	0	0	0	0	-1	0	0						0	0	0	0	0	0
2017-02-03 15:29:50	2400100135	1		1964-03-05	西京医院	胃肠外科	2016-08-17	-1	0	0	0	0	0	0	0	0	0	0	0	0	0	0	0	0	0	0	0	0	0	0	0	0	0	-1	0	0						0	0	0	0	0	0
2017-01-22 16:46:26	2400100118	2	2	1953-03-25	西京医院	胃肠外科	2016-09-02	-1	0	0	0	0	0	0	0	0	0	0	0	0	0	0	0	0	0	0	1	0	0	0	0	0	0	-1	0	0						0	0	0	0	0	0
2016-05-18 18:38:47	1900101181	2		1966-09-11	中山大学第一附属医院	胃肠外科	2014-11-03		0	0	0	0	0	0	0	0	0	0	0	0	0	0	0	0	0	0	0	0	0	0	0	0	0		0	0						0	0	0	0	0	0
2017-01-20 11:15:32	2400100103	1		1966-08-28	西京医院	胃肠外科	2016-09-27	-1	1	0	0	0	0	0	0	0	0	0	0	0	0	0	0	0	0	0	0	0	0	1	0	0	0	-1	0	0						0	0	0	0	1	6	1
2016-05-13 15:07:08	1300200012	1		1947-12-20	福建省肿瘤医院	干部保健特需病房	2014-02-17		0	0	0	0	0	0	0	1	0	0	0	0	0	0	0	0	0	0	0	0	0	1	0	0	0		0	0						0	0	0	0	0	0
2016-03-13 22:48:20	800105188	1		1962-12-12	吉林大学白求恩第一医院	胃肠外科	2015-10-23	-1	0	0	0	0	0	0	0	0	0	0	0	0	0	0	0	0	0	0	0	0	0	0	0	0	0	-1	1	2	1		1			7	0	4	0	0	0
2016-05-13 15:17:35	1300200080	2		1968-08-03	福建省肿瘤医院	七区 胃肠肿瘤外科	2014-02-25		0	0	0	0	0	0	0	0	0	0	0	0	0	0	0	0	0	0	0	0	0	0	0	0	0		0	0						0	0	0	0	0	0
2016-05-13 15:19:11	1300200092	2		1961-11-21	福建省肿瘤医院	七区 胃肠肿瘤外科	2014-02-20		0	0	0	0	0	0	0	0	0	0	0	0	0	0	0	0	0	0	0	0	0	0	0	0	0		0	0						0	0	0	0	0	0
2016-05-13 15:30:35	1300200178	1		1958-09-07	福建省肿瘤医院	干部保健特需病房	2014-04-09		0	0	0	0	0	0	0	1	0	0	0	0	0	0	0	0	0	0	0	0	0	1	0	0	0		1	7	1					0	0	14	0	0	0
2017-03-22 21:40:32	800105805	2	1	1953-03-09	吉林大学白求恩第一医院	胃肠外科	2017-01-04	-1	0	0	0	0	0	0	0	0	0	0	0	0	0	0	0	0	0	0	0	0	1	0	0	0	0	4	0	0						0	0	0	0	0	0
2016-05-11 10:41:25	1300200968	1		1949-09-13	福建省肿瘤医院	七区 胃肠肿瘤外科	2015-04-27		0	0	0	0	0	0	0	1	0	0	0	0	0	0	0	0	0	0	0	0	0	0	0	0	0		0	0						0	0	0	0	0	0
2017-03-06 11:20:18	2400100258	1		1957-04-25	西京医院	胃肠外科	2017-02-16	-1	0	0	0	0	0	0	0	0	0	0	0	0	0	0	0	0	0	0	0	0	1	0	0	0	0	4	0	0						0	0	0	0	0	0
2016-05-04 11:12:55	1300200351	1		1955-09-01	福建省肿瘤医院	七区 胃肠肿瘤外科	2014-05-28		0	0	0	0	0	0	0	0	0	0	0	0	0	0	0	0	0	0	0	0	0	0	0	0	0		0	0						0	0	0	0	0	0
2015-08-13 19:28:52	800104257	1		1949-02-12	吉林大学白求恩第一医院	胃肠外科	2015-05-18		0	0	0	0	0	0	0	0	0	0	0	0	0	0	0	0	0	0	0	0	0	0	0	0	0	-1	1	14	1					0	0	28	0	0	0
2016-05-11 09:57:21	1300200923	2		1966-08-27	福建省肿瘤医院	干部保健特需病房	2015-05-20		0	0	0	0	0	0	0	0	0	0	0	0	0	0	0	0	0	0	0	0	0	0	0	0	0		0	0						0	0	0	0	0	0
2017-02-21 08:27:54	2400100166	1		1960-01-02	西京医院	胃肠外科	2016-07-21	-1	0	0	0	0	0	0	0	0	0	0	0	0	0	0	0	0	0	0	0	0	0	0	0	0	0	-1	1	1			1			1	0	0	0	0	0
2014-06-16 13:25:16	800101809	1		1944-05-10	吉林大学白求恩第一医院	肿瘤中心	2014-04-26		0	0	0	0	0	0	0	0	0	0	0	0	0	0	0	0	0	0	0	0	0	0	0	0	0	-1	1	2	1					0	0	28	0	0	0
2016-05-13 10:02:23	1300200413	1		1968-06-23	福建省肿瘤医院	二区 胸部肿瘤外科	2014-06-04		0	0	0	0	0	0	0	1	0	0	0	0	0	0	0	0	0	0	0	0	0	0	0	0	0		0	0						0	0	0	0	0	0
2016-05-16 15:11:56	1900101326	2		1955-02-21	中山大学第一附属医院	胃肠外科	2015-04-24		0	0	0	0	0	0	0	0	0	0	0	0	0	0	0	0	0	0	0	0	0	0	0	0	0		0	0						0	0	0	0	0	0
2017-03-03 16:04:43	2400100247	1		1966-04-27	西京医院	胃肠外科	2016-05-13	-1	0	0	0	0	0	0	0	0	0	0	0	0	0	0	0	0	0	0	0	0	0	0	0	0	0	4	0	0						0	0	0	0	0	0
2019-03-22 12:33:03	800108113	2	1	1969-12-29	吉林大学白求恩第一医院	肿瘤中心	2018-12-24	-1	0	0	0	0	0	0	0	0	0	0	0	0	0	0	0	0	0	0	0	0	1	0	0	0	0	4	0	0						0	0	0	0	0	0
2016-05-19 13:23:25	500700136	1		1971-07-11	邢台市人民医院	肿瘤内科	2014-01-07	-1	0	0	0	0	0	0	0	0	0	0	0	0	0	0	0	0	0	0	0	0	0	1	0	0	0		0	0						0	0	0	0	1	2	1	1
2016-05-19 13:36:42	500700162	1		1952-09-18	邢台市人民医院	肿瘤内科	2014-04-23	-1	0	0	0	0	0	0	0	0	0	0	0	0	0	0	0	0	0	0	0	0	0	0	0	0	0		0	0						0	0	0	0	1	3	1
2016-05-19 13:38:29	500700169	1		1953-09-13	邢台市人民医院	肿瘤内科	2013-12-05	-1	0	0	0	0	0	0	0	0	0	0	0	0	0	0	0	0	0	0	0	0	0	1	0	0	0		0	0						0	0	0	0	1	3	1
2016-05-06 15:25:31	1300200536	2		1958-07-23	福建省肿瘤医院	七区 胃肠肿瘤外科	2014-07-24		0	0	0	0	0	0	0	0	0	0	0	0	0	0	0	0	0	0	0	0	0	0	0	0	0		0	0						0	0	0	0	0	0
2016-05-06 15:45:32	1300200559	1		1953-12-26	福建省肿瘤医院	干部保健特需病房	2014-08-18		0	0	0	0	0	0	1	0	0	0	0	0	0	0	0	0	0	0	0	0	0	1	0	0	0		0	0						0	0	0	0	0	0
2016-05-12 10:19:38	1300201061	1		1972-05-04	福建省肿瘤医院	干部保健特需病房	2015-09-10		0	0	0	0	0	0	0	0	0	0	0	0	0	0	0	0	0	0	0	0	0	0	0	0	0		0	0						0	0	0	0	0	0
2016-05-12 11:11:41	1300201103	1		1966-04-20	福建省肿瘤医院	干部保健特需病房	2015-08-04		0	0	0	0	0	0	0	0	0	0	0	0	0	0	0	0	0	0	0	0	0	0	0	0	0		0	0						0	0	0	0	1	7		1
2017-04-17 00:45:04	2800101604	1		1956-08-26	广西医科大学附属肿瘤医院	胃肠二区	2017-04-05	-1	0	0	0	0	0	0	0	0	0	0	0	0	0	0	0	0	0	0	0	0	1	0	0	0	0	4	0	0						0	0	0	0	0	0
2016-03-29 20:50:01	800105332	1		1956-03-09	吉林大学白求恩第一医院	胃肠外科	2015-09-08		0	0	0	0	0	0	0	0	0	0	0	0	0	0	0	0	0	0	0	0	0	0	0	0	0	-1	1	7	1		1			7	0	7	0	0	0
2016-05-10 16:04:12	1300200818	1		1962-07-13	福建省肿瘤医院	干部保健特需病房	2014-12-17		0	0	0	0	0	0	0	0	0	0	0	0	0	0	0	0	0	0	0	0	0	0	0	0	0		0	0						0	0	0	0	0	0
2016-05-12 10:35:14	1300201087	2		1968-09-07	福建省肿瘤医院	干部保健特需病房	2015-10-19		0	0	0	0	0	0	0	0	0	0	0	0	0	0	0	0	0	0	0	0	0	0	0	0	0		0	0						0	0	0	0	1	7		1
2016-04-02 10:44:18	800105346	2		1962-08-29	吉林大学白求恩第一医院	胃肠外科	2015-11-05		0	0	0	0	0	0	0	0	0	0	0	0	0	0	0	0	0	0	0	0	0	0	0	0	0	-1	0	0						0	0	0	0	0	0
2017-02-20 22:55:24	800105577	1		1956-01-14	吉林大学白求恩第一医院	胃肠外科	2015-10-27	-1	0	0	0	0	0	0	0	0	0	0	0	0	0	0	0	0	0	0	0	0	1	0	0	0	0		1	7	1					0	0	21	0	0	0
2016-05-13 15:02:25	1300201197	1		1957-10-21	福建省肿瘤医院	干部保健特需病房	2015-11-10		0	0	0	0	0	0	1	1	0	0	0	0	0	0	0	0	0	0	0	0	0	0	0	0	0		0	0						0	0	0	0	0	0
2017-03-14 11:37:23	2400100286	1		1962-08-09	西京医院	胃肠外科	2017-02-07	-1	0	0	0	0	0	0	0	0	0	0	0	0	0	0	0	0	0	0	0	0	1	0	0	0	0	4	0	0						0	0	0	0	0	0
2016-06-21 17:10:34	1300201275	2		1963-04-04	福建省肿瘤医院	干部保健特需病房	2016-03-31		0	0	0	0	0	0	0	0	0	0	0	0	0	0	0	0	0	0	0	0	1	0	0	0	0		0	0						0	0	0	0	0	0
2018-01-12 17:16:29	400102469	1		1964-11-04	重庆大坪医院	胃结直肠外科	2017-11-20	-1	0	0	0	0	0	0	0	1	0	0	0	0	0	0	0	0	0	0	0	0	0	0	0	0	0	4	0	0						0	0	0	0	0	0
2014-01-25 11:37:07	800100084	1		1950-10-13	吉林大学白求恩第一医院	肿瘤中心	2013-11-26		0	0	0	0	0	0	0	0	0	0	0	0	0	0	0	0	0	0	0	0	0	1	0	0	0	-1	0	0						0	0	0	0	0	0
2018-10-06 20:02:00	2800400267	1		1961-08-01	广西医科大学一附院	胃肠腺体外科	2018-05-18	-1	0	0	0	0	0	0	0	0	0	0	0	0	0	0	0	0	0	0	0	0	0	0	0	0	0	4	0	0						0	0	0	0	0	0
2018-01-18 10:56:48	800106321	1		1954-06-15	吉林大学白求恩第一医院	肿瘤中心	2017-07-10	-1	0	0	0	0	0	0	0	0	0	0	0	0	0	0	0	0	0	0	0	0	1	0	0	0	0	4	0	0						0	0	0	0	0	0
2018-10-29 23:31:21	800106649	2		1986-07-30	吉林大学白求恩第一医院	肿瘤中心	2017-07-30	-1	0	0	0	0	0	0	0	0	0	0	0	0	0	0	0	0	0	0	0	0	1	0	0	0	0	4	0	0						0	0	0	0	0	0
2019-11-12 22:40:56	800108924	2	1	1953-02-20	吉林大学白求恩第一医院	肿瘤中心	2018-08-08	-1	0	0	0	0	0	0	0	0	0	0	0	0	0	0	0	0	0	0	0	0	1	0	0	0	0	4	0	0						0	0	0	0	0	0
2019-12-11 21:24:35	800109537	1		1951-03-17	吉林大学白求恩第一医院	肿瘤中心	2019-07-16	-1	0	0	0	0	0	0	1	0	0	0	0	0	0	0	0	0	0	0	0	0	0	0	0	0	0	4	0	0						0	0	0	0	1	7
2019-10-27 18:10:43	800108707	1		1971-06-10	吉林大学白求恩第一医院	肿瘤中心	2018-07-16	-1	0	0	0	0	0	0	0	0	0	0	0	0	0	0	0	0	0	0	0	0	1	0	0	0	0	4	0	0						0	0	0	0	0	0
2017-11-24 14:35:31	1300201897	1		1954-06-13	福建省肿瘤医院	干部保健特需病房	2017-11-22	-1	0	0	0	0	0	0	0	0	0	0	0	0	0	0	0	0	0	0	0	0	1	0	0	0	0	4	0	0						0	0	0	0	0	0
2019-03-28 19:10:37	800108169	1		1955-07-28	吉林大学白求恩第一医院	肿瘤中心	2018-12-13	-1	0	0	0	0	0	0	1	0	0	0	0	0	0	0	0	0	0	0	0	0	0	0	0	0	0	4	0	0						0	0	0	0	0	0
2017-02-24 11:47:16	1300201502	2	1	1954-01-04	福建省肿瘤医院	干部保健特需病房	2017-01-09		0	0	0	0	0	0	0	0	0	0	0	0	0	0	0	0	0	0	0	0	1	0	0	0	0	4	0	0						0	0	0	0	0	0
2015-08-11 19:06:18	800104323	1		1986-10-13	吉林大学白求恩第一医院	胃肠外科	2015-06-04		0	0	0	0	0	0	0	0	0	0	0	0	0	0	0	0	0	0	0	0	0	0	0	0	0	-1	0	0						0	0	0	0	0	0
2017-03-28 16:39:47	1300201529	1		1970-07-21	福建省肿瘤医院	干部保健特需病房	2017-03-06		0	0	0	0	0	0	0	0	0	0	0	0	0	0	0	0	0	0	0	0	1	0	0	0	0	4	0	0						0	0	0	0	0	0
2019-12-16 21:52:36	2800400295	1		1962-06-12	广西医科大学一附院	胃肠腺体外科	2019-02-11	-1	0	0	0	0	0	0	0	0	0	0	0	0	0	0	0	0	0	0	0	0	1	0	0	0	0	4	0	0						0	0	0	0	0	0
2014-07-10 18:00:42	800102076	1		1961-04-08	吉林大学白求恩第一医院	肿瘤中心	2014-05-21		0	0	0	0	0	0	0	0	0	0	0	0	0	0	0	0	0	0	0	0	0	0	0	0	0	-1	0	0						0	0	0	0	0	0
2016-05-16 13:09:37	800103046	1		1989-01-27	吉林大学白求恩第一医院	肿瘤中心	2014-12-15		0	0	0	0	0	0	0	0	0	0	0	0	0	0	0	0	0	0	0	0	0	0	0	0	0	-1	0	0						0	0	0	0	0	0
2018-12-12 15:52:38	100900461	2		1971-06-08	首都医科大学附属北京世纪坛医院	结直肠肿瘤外科	2018-12-04	-1	0	0	0	0	0	0	0	0	0	0	0	0	0	0	0	0	0	0	0	0	1	0	0	0	0	4	0	0						0	0	0	0	1	7		1
2015-04-18 20:05:05	800103605	1		1961-08-11	吉林大学白求恩第一医院	肿瘤中心	2015-03-25		0	0	0	0	0	0	0	0	0	0	0	0	0	0	0	0	0	0	0	0	0	0	0	0	0	-1	1	7	1					0	0	7	0	0	0
2018-12-29 22:02:25	800107550	1		1964-06-01	吉林大学白求恩第一医院	肿瘤中心	2018-05-16	-1	0	0	0	0	0	0	1	1	0	0	0	0	0	0	0	0	0	0	0	0	0	0	0	0	0	4	0	0						0	0	0	0	1	7	1	1
2013-12-02 08:28:17	1900100561	2		1964-09-24	中山大学第一附属医院	胃肠外科	2013-10-26		0	0	0	0	0	0	0	0	0	0	0	0	0	0	0	0	0	0	0	0	0	0	0	0	0	-1	0	0						0	0	0	0	0	0
2014-12-29 17:05:45	400100413	2		1974-06-28	重庆大坪医院	肿瘤科	2014-12-08		0	0	0	0	0	0	0	0	0	0	0	0	0	0	0	0	0	0	0	0	0	1	0	0	0	-1	0	0						0	0	0	0	0	0
2017-08-09 10:50:24	1300201655	1		1953-10-19	福建省肿瘤医院	干部保健特需病房	2017-08-04		0	1	0	0	0	0	0	0	0	0	0	0	0	0	0	0	0	0	0	0	0	0	0	0	0	4	0	0						0	0	0	0	1	14		1
2019-03-07 11:47:52	800107996	1		1961-11-12	吉林大学白求恩第一医院	肿瘤中心	2018-05-14	-1	0	0	0	0	0	0	0	0	0	0	0	0	0	0	0	0	0	0	0	0	1	0	0	0	0	4	0	0						0	0	0	0	0	0
2019-11-17 11:24:44	800109100	2		1970-11-30	吉林大学白求恩第一医院	肿瘤中心	2019-04-08	-1	0	0	0	0	0	0	0	0	0	0	0	0	0	0	0	0	0	0	0	0	1	1	0	0	0	4	0	0						0	0	0	0	1	1
2017-09-04 10:14:36	1300201725	1		1948-10-15	福建省肿瘤医院	七区 胃肠肿瘤外科	2017-08-21	-1	0	0	0	0	0	0	1	1	0	0	0	0	0	0	0	0	0	0	0	0	0	0	0	0	0	4	0	0						0	0	0	0	0	0
2017-09-05 09:29:11	1300201729	1		1973-05-28	福建省肿瘤医院	七区 胃肠肿瘤外科	2017-08-21	-1	0	0	0	0	0	0	1	0	0	0	0	0	0	0	0	0	0	0	0	0	0	0	0	0	0	4	1	7	1	1	1	1	1	8	2	30	0	1	14
2019-11-24 12:12:39	800109382	2	1	1973-04-04	吉林大学白求恩第一医院	肿瘤中心	2019-05-20	-1	0	0	0	0	0	0	0	0	0	0	0	0	0	0	0	0	0	0	0	0	1	0	0	0	0	4	0	0						0	0	0	0	0	0
2019-12-19 17:49:30	800109668	2	1	1971-10-23	吉林大学白求恩第一医院	肿瘤中心	2019-11-06	-1	0	0	0	0	0	0	1	0	0	0	0	0	0	0	0	0	1	0	0	0	0	0	0	0	0	4	0	0						0	0	0	0	0	0
2017-09-21 09:43:20	1300201737	2		1977-09-26	福建省肿瘤医院	干部保健特需病房	2017-09-18		0	0	0	0	0	0	0	0	0	0	0	0	0	0	0	0	0	0	0	0	1	0	0	0	0	4	0	0						0	0	0	0	0	0
2017-10-18 16:26:40	1300201785	2		1984-01-27	福建省肿瘤医院	干部保健特需病房	2017-09-07		0	0	0	0	0	0	0	0	0	0	0	0	0	0	0	0	0	0	0	0	1	0	0	0	0	4	0	0						0	0	0	0	0	0
2017-10-20 14:18:23	1300201801	2	1	1966-01-03	福建省肿瘤医院	七区 胃肠肿瘤外科	2017-10-08	-1	0	0	0	0	0	0	0	0	0	0	0	0	0	0	0	0	0	0	0	0	1	0	0	0	0	4	0	0						0	0	0	0	0	0
2019-11-30 10:38:10	800109422	1		1952-05-19	吉林大学白求恩第一医院	肿瘤中心	2019-07-08	-1	0	0	0	0	0	0	0	0	0	0	0	0	0	0	0	0	0	0	0	0	1	0	0	0	0	4	1	7	1					0	0	35	0	0	0
2019-10-29 16:03:50	800108725	1		1984-10-29	吉林大学白求恩第一医院	肿瘤中心	2019-07-15	-1	0	0	0	0	0	0	0	0	0	0	0	0	0	0	0	0	0	0	0	0	1	0	0	0	0	4	0	0						0	0	0	0	0	0
2017-02-24 10:24:46	1300201497	2	1	1962-11-20	福建省肿瘤医院	干部保健特需病房	2017-02-13		0	0	0	0	0	0	0	0	0	0	0	0	0	0	0	0	0	0	0	0	1	0	0	0	0	4	0	0						0	0	0	0	0	0
2019-10-26 12:33:04	800108684	2	1	1957-10-17	吉林大学白求恩第一医院	肿瘤中心	2018-07-05	-1	0	0	0	0	0	0	0	0	0	0	0	0	0	0	0	0	0	0	0	0	1	0	0	0	0	4	0	0						0	0	0	0	0	0
2019-11-22 12:10:16	800109282	1		1949-11-14	吉林大学白求恩第一医院	肿瘤中心	2019-08-14	-1	0	0	0	0	0	0	0	0	0	0	0	0	0	0	0	0	0	0	0	0	1	0	0	0	0	4	0	0						0	0	0	0	0	0
2019-12-24 18:46:06	800109831	2	1	1964-12-31	吉林大学白求恩第一医院	肿瘤中心	2019-10-30	-1	0	0	0	0	0	0	1	0	0	0	0	0	0	0	0	0	0	0	0	0	0	0	0	0	0	4	0	0						0	0	0	0	0	0
2019-12-07 21:26:03	800109512	1		1962-12-30	吉林大学白求恩第一医院	肿瘤中心	2019-09-09	-1	0	0	0	0	0	0	0	0	0	0	0	0	0	0	0	0	0	0	0	0	1	0	0	0	0	4	0	0						0	0	0	0	0	0
2019-12-26 16:08:21	800109914	1		1963-10-02	吉林大学白求恩第一医院	肿瘤中心	2019-11-04	-1	0	0	0	0	0	0	0	0	0	0	0	0	0	0	0	0	0	0	1	0	0	1	0	0	0	4	1	14	1					0	0	70	0	1	7	1
2014-06-06 17:28:45	1900100849	1		1981-03-26	中山大学第一附属医院	胃肠外科	2014-05-19		0	0	0	0	0	0	0	0	0	0	0	0	0	0	0	0	0	0	0	0	0	0	0	0	0	-1	0	0						0	0	0	0	1	7		1
2014-06-27 15:39:23	1900100920	2		1978-12-04	中山大学第一附属医院	胃肠外科	2014-05-26		0	0	0	0	0	0	0	0	0	0	0	0	0	0	0	0	0	0	0	0	0	0	0	0	0	-1	0	0						0	0	0	0	1	7	1
2019-07-31 11:37:44	800108495	1		1963-06-13	吉林大学白求恩第一医院	肿瘤中心	2019-02-11	-1	0	0	0	0	0	0	0	0	0	0	0	0	0	0	0	0	1	0	0	0	0	0	0	0	0	4	0	0						0	0	0	0	1	20		1
2019-12-16 17:27:03	800109614	1		1971-03-29	吉林大学白求恩第一医院	肿瘤中心	2019-10-20	-1	0	0	0	0	0	0	0	0	0	0	0	0	0	0	0	0	0	0	0	0	1	1	0	0	0	4	0	0						0	0	0	0	0	0
2019-12-12 14:06:21	800109552	1		1961-06-14	吉林大学白求恩第一医院	肿瘤中心	2019-10-21	-1	0	0	0	0	0	0	1	0	0	0	0	0	0	0	0	0	0	0	0	0	0	0	0	0	0	4	0	0						0	0	0	0	0	0
2019-12-26 11:47:15	800109897	2	1	1965-11-30	吉林大学白求恩第一医院	肿瘤中心	2019-10-28	-1	0	0	1	0	0	0	0	1	0	0	0	0	0	0	0	0	0	0	0	0	0	0	0	0	0	4	0	0						0	0	0	0	0	0
2018-05-22 09:21:54	1300202326	2	1	1955-09-22	福建省肿瘤医院	干部保健特需病房	2018-05-16	-1	0	0	0	0	0	0	0	0	0	0	0	0	0	0	0	0	0	0	0	0	1	0	0	0	0	4	0	0						0	0	0	0	0	0
2019-12-20 21:10:56	800109723	1		1970-08-29	吉林大学白求恩第一医院	肿瘤中心	2019-07-14	-1	0	0	0	0	0	0	0	0	0	0	0	0	0	0	0	0	0	0	0	0	1	0	0	0	0	4	0	0						0	0	0	0	0	0
2019-12-24 20:30:33	800109838	1		1966-05-23	吉林大学白求恩第一医院	肿瘤中心	2019-10-21	-1	0	0	0	0	0	0	0	0	0	0	0	0	0	0	0	0	0	1	0	0	0	0	0	0	0	4	0	0						0	0	0	0	0	0
2014-12-31 17:29:17	400100314	2		2014-12-23	重庆大坪医院	胃结直肠外科	2014-12-15		0	0	0	0	0	0	1	0	0	0	0	0	0	0	0	0	0	0	0	0	0	0	0	0	0	-1	0	0						0	0	0	0	0	0
2019-05-19 22:25:25	800108286	1		1973-10-12	吉林大学白求恩第一医院	肿瘤中心	2019-03-25	-1	0	0	0	0	0	0	0	0	0	0	0	0	0	0	0	0	0	0	0	0	1	0	0	0	0	4	0	0						0	0	0	0	0	0
2019-05-28 16:30:37	800108333	2	1	1965-11-21	吉林大学白求恩第一医院	肿瘤中心	2019-03-18	-1	0	0	0	0	0	0	1	0	0	0	0	0	0	0	0	0	0	0	0	0	0	0	0	0	0	4	0	0						0	0	0	0	0	0
2018-07-19 10:44:49	1300202414	2	1	1963-05-12	福建省肿瘤医院	干部保健特需病房	2018-07-16	-1	0	1	0	0	0	0	0	0	0	0	0	0	0	0	0	0	0	0	0	0	0	0	0	0	0	4	0	0						0	0	0	0	0	0
2019-11-25 15:56:17	800109412	1		1959-12-31	吉林大学白求恩第一医院	肿瘤中心	2019-10-08	-1	0	0	0	0	0	0	0	0	0	0	0	0	0	0	0	0	0	0	0	0	1	0	0	0	0	4	1	3	1					0	0	15	0	1	5	1	1
2018-12-26 17:26:01	2300102650	1		1949-07-29	昆明医科大学第一附属医院	普外一科（胃肠与疝外科）	2018-12-11	-1	0	0	0	0	0	0	0	0	0	0	0	0	0	0	0	0	0	0	0	0	1	0	0	0	0	4	0	0						0	0	0	0	0	0
2016-05-06 14:38:56	800102849	2		1967-06-17	吉林大学白求恩第一医院	肿瘤中心	2014-11-14		0	0	0	0	0	0	0	0	0	0	0	0	0	0	0	0	0	0	0	0	0	0	0	0	0	-1	0	0						0	0	0	0	0	0
2018-11-02 10:34:31	1300202549	1		1959-09-22	福建省肿瘤医院	干部保健特需病房	2018-10-22	-1	0	0	0	0	0	0	0	0	0	0	0	0	0	0	0	0	0	0	0	0	1	1	0	0	0	4	1	14	1					0	0	10	0	0	0
2019-12-24 20:40:15	800109840	1		1959-09-19	吉林大学白求恩第一医院	肿瘤中心	2019-10-17	-1	0	0	0	0	0	0	0	1	0	0	0	0	0	0	0	0	0	0	0	0	0	0	0	0	0	4	0	0						0	0	0	0	1	7	1
2016-05-10 13:06:15	3200100290	1		1961-11-05	新疆喀什地区第一人民医院	心胸外科	2015-03-23		0	0	0	0	0	0	0	0	0	0	0	0	0	0	0	0	0	0	0	0	0	0	0	0	0		0	0						0	0	0	0	0	0
2018-11-19 16:02:16	1300202588	1		1951-08-09	福建省肿瘤医院	干部保健特需病房	2018-11-12	-1	0	0	0	0	0	0	0	0	0	0	0	0	0	0	0	0	0	0	0	0	1	0	0	0	0	4	1	7	1					0	0	21	0	1	7		1
2016-05-10 13:09:48	3200100293	1		1949-06-04	新疆喀什地区第一人民医院	心胸外科	2015-04-14		0	0	0	0	0	0	0	0	0	0	0	0	0	0	0	0	0	0	0	0	0	0	0	0	0		0	0						0	0	0	0	0	0
2019-11-22 10:28:19	800109273	1		1949-10-20	吉林大学白求恩第一医院	肿瘤中心	2019-08-19	-1	0	0	0	0	0	0	0	0	0	0	0	0	0	0	0	0	0	0	0	0	1	0	0	0	0	4	0	0						0	0	0	0	1	7
2019-12-13 13:24:58	800109558	1		1958-02-01	吉林大学白求恩第一医院	肿瘤中心	2019-08-05	-1	0	0	0	0	0	0	0	1	0	0	0	0	0	0	0	0	0	0	0	0	0	1	0	0	0	4	0	0						0	0	0	0	0	0
2016-05-13 10:13:18	1300201068	1		1950-04-03	福建省肿瘤医院	干部保健特需病房	2015-08-11		0	0	0	0	0	0	0	0	0	0	0	0	0	0	0	0	0	0	0	0	0	0	0	0	0		0	0						0	0	0	0	0	0
2016-05-16 17:57:01	3200100283	1		1950-09-05	新疆喀什地区第一人民医院	消化腹部肿瘤外一科	2015-04-07		0	0	0	0	0	0	0	1	0	0	0	0	0	0	0	0	0	0	0	0	0	0	0	0	0		0	0						0	0	0	0	1	7
2019-12-28 21:02:10	800109956	1		1964-12-08	吉林大学白求恩第一医院	肿瘤中心	2019-10-21	-1	0	0	0	0	0	0	0	0	0	0	0	0	0	0	0	0	0	0	0	0	1	0	0	0	0	4	0	0						0	0	0	0	0	0
2021-01-29 20:52:16	2300104305	2		1972-10-03	昆明医科大学第一附属医院	普外一科（胃肠与疝外科）	2021-01-07	-1	0	0	0	0	0	0	0	0	0	0	0	0	0	0	0	0	0	0	0	0	1	0	0	0	0	4	0	0						0	0	0	0	0	0
2021-02-27 15:01:50	2300104354	1		1968-02-27	昆明医科大学第一附属医院	普外一科（胃肠与疝外科）	2021-02-18	-1	0	0	0	0	0	0	0	0	0	0	0	0	0	0	0	0	0	0	1	0	0	0	0	0	0	4	0	0						0	0	0	0	0	0
2017-02-28 10:12:14	2400100207	1		1942-09-20	西京医院	胃肠外科	2016-05-17	-1	0	0	0	0	0	0	0	0	0	0	0	0	0	0	0	0	0	0	0	0	1	0	0	0	0	4	0	0						0	0	0	0	0	0
2017-03-14 08:41:49	2400100279	2	1	1960-05-09	西京医院	胃肠外科	2017-01-17	-1	0	0	0	0	0	0	1	1	0	0	0	0	0	0	0	0	0	0	0	0	0	0	0	0	0	4	0	0						0	0	0	0	0	0
2016-05-12 20:48:03	2800400013	1		1945-12-24	广西医科大学一附院	胃肠腺体外科	2015-05-12	-1	0	0	0	0	0	0	0	0	0	0	0	0	0	0	0	0	0	0	0	0	1	0	0	0	0	-1	0	0						0	0	0	0	1	5	1
2015-08-03 01:42:46	800104044	2		1960-05-05	吉林大学白求恩第一医院	胃肠外科	2015-06-16	-1	0	0	0	1	0	0	0	0	0	0	0	0	0	0	0	0	0	0	0	0	0	0	0	0	0	-1	0	0						0	0	0	0	0	0
2017-08-01 22:24:58	2200100473	2	1	1941-09-04	贵州省遵义市医学院附属肿瘤医院（一附院）	胸部肿瘤科	2017-05-15	-1	0	0	0	0	0	0	0	0	0	0	0	0	0	0	0	0	1	0	0	0	0	0	0	0	0	4	0	0						0	0	0	0	0	0
2017-03-01 18:55:08	2400100217	1		1963-03-08	西京医院	胃肠外科	2016-05-26	-1	0	0	0	0	0	0	0	0	0	0	0	0	0	0	0	0	0	0	0	0	0	0	0	0	0	4	0	0						0	0	0	0	0	0
2017-03-02 14:04:36	2400100228	2	1	1960-06-19	西京医院	胃肠外科	2016-03-15	-1	0	0	0	0	0	0	0	1	0	0	0	0	0	0	0	0	0	0	0	0	0	0	0	0	0	4	0	0						0	0	0	0	0	0
2016-05-13 15:28:07	1300200156	1		1962-11-27	福建省肿瘤医院	三十一区 腹部肿瘤内科	2014-04-05		0	0	0	0	0	0	0	0	0	0	0	0	0	0	0	0	0	0	0	0	0	1	0	0	0		0	0						0	0	0	0	0	0
2017-02-27 21:16:59	2400100203	2	1	1942-10-07	西京医院	胃肠外科	2014-02-17	-1	0	0	0	0	0	0	0	0	0	0	0	0	0	0	0	0	0	0	0	0	1	1	0	0	0	4	0	0						0	0	0	0	0	0
2016-05-04 11:17:18	1300200357	2		1959-12-18	福建省肿瘤医院	七区 胃肠肿瘤外科	2014-06-09		0	0	0	0	0	0	0	0	0	0	0	0	0	0	0	0	0	0	0	0	0	0	0	0	0		0	0						0	0	0	0	0	0
2016-05-19 13:37:37	500700166	1		1970-01-21	邢台市人民医院	肿瘤内科	2013-12-24	-1	0	0	0	0	0	0	0	0	0	0	0	0	0	0	0	0	0	0	0	0	0	0	0	0	0		0	0						0	0	0	0	1	2	1
2016-05-13 09:26:58	1300200246	1		1962-01-11	福建省肿瘤医院	二区 胸部肿瘤外科	2014-04-21		0	0	0	0	0	0	0	0	0	0	0	0	0	0	0	0	0	0	0	0	0	0	0	0	0		0	0						0	0	0	0	0	0
2016-05-10 08:31:56	1300200597	1		1947-12-17	福建省肿瘤医院	二十三区 中西医结合科	2014-06-11		0	0	0	0	0	0	0	0	0	0	0	0	0	0	0	0	0	0	0	0	0	0	0	0	0		0	0						0	0	0	0	0	0
2016-05-04 11:13:30	1300200352	2		1950-05-19	福建省肿瘤医院	七区 胃肠肿瘤外科	2014-05-20		0	0	0	0	0	0	0	0	0	0	0	0	0	0	0	0	0	0	0	0	0	0	0	0	0		0	0						0	0	0	0	0	0
2015-09-28 19:11:41	800104823	1		1962-12-25	吉林大学白求恩第一医院	胃肠外科	2015-07-04		0	0	0	0	1	0	0	1	0	1	0	0	0	0	1	0	1	0	0	0	0	1	0	0	0	-1	1	5	1					0	0	15	0	0	0
2015-04-22 21:01:12	400100363	2		1945-05-10	重庆大坪医院	肿瘤科	2014-11-26		0	0	0	0	0	0	0	0	0	0	0	0	0	0	0	0	0	0	0	0	0	0	0	0	0	-1	0	0						0	0	0	0	0	0
2014-07-12 14:00:24	800102119	1		1956-02-05	吉林大学白求恩第一医院	胃肠外科	2014-03-17	-1	0	0	0	0	0	0	0	0	0	0	0	0	0	0	0	0	0	0	0	0	0	1	0	0	0	-1	0	0						0	0	0	0	1	2	1
2016-05-13 10:07:37	1300200458	2		1946-11-01	福建省肿瘤医院	七区 胃肠肿瘤外科	2014-06-30		0	0	0	0	0	0	0	1	0	0	0	0	0	0	0	0	0	0	0	0	0	0	0	0	0		0	0						0	0	0	0	0	0
2016-05-06 16:10:55	1300200568	1		1950-12-08	福建省肿瘤医院	三十一区 腹部肿瘤内科	2014-08-20		0	0	0	0	0	0	0	0	0	0	0	0	0	0	0	0	0	0	0	0	0	0	0	0	0		0	0						0	0	0	0	0	0
2016-05-10 10:31:12	1300200735	1		1965-06-05	福建省肿瘤医院	七区 胃肠肿瘤外科	2014-09-28		0	0	0	0	0	0	0	0	0	0	0	0	0	0	0	0	0	0	0	0	0	0	0	0	0		0	0						0	0	0	0	0	0
2016-05-13 10:33:48	1300200725	1		1947-10-16	福建省肿瘤医院	七区 胃肠肿瘤外科	2014-08-29		0	0	0	0	0	0	0	1	0	0	0	0	0	0	0	0	0	0	0	0	0	0	0	0	0		0	0						0	0	0	0	0	0
2014-11-25 19:35:17	800102749	2		1962-09-04	吉林大学白求恩第一医院	胃肠外科	2014-06-23		0	0	0	0	0	0	0	0	0	0	0	0	0	0	0	1	0	0	0	0	0	0	0	0	0	-1	0	0						0	0	0	0	0	0
2017-01-20 15:39:36	2400100105	1		1975-08-04	西京医院	胃肠外科	2016-09-28	-1	0	0	0	0	0	0	0	0	0	0	0	0	0	0	0	0	0	0	0	0	1	1	0	0	0	-1	0	0						0	0	0	0	0	0
2016-05-03 10:48:01	1300200253	1		1957-10-07	福建省肿瘤医院	三十一区 腹部肿瘤内科	2014-04-24		0	1	0	0	0	0	0	0	0	0	0	0	0	0	0	0	0	0	0	0	0	1	0	0	0		0	0						0	0	0	0	1	10	1
2016-05-06 11:20:41	1300200485	1		1946-11-04	福建省肿瘤医院	三十一区 腹部肿瘤内科	2014-07-02		0	0	0	0	0	0	0	0	0	0	0	0	0	0	0	0	1	0	0	0	0	0	0	0	0		0	0						0	0	0	0	0	0
2013-10-16 10:39:03	1900100300	2		1952-09-02	中山大学第一附属医院	胃肠外科	2013-03-22	-1	0	0	0	0	0	0	0	0	0	0	0	0	0	0	0	0	0	0	0	0	0	0	0	0	0	-1	0	0						0	0	0	0	0	0
2016-05-06 11:19:02	2800300124	1		1958-11-20	广西壮族自治区人民医院	放疗病区	2015-03-09	-1	0	0	0	0	0	0	0	0	0	0	0	0	0	0	0	0	0	0	0	0	0	0	0	0	0		0	0						0	0	0	0	0	0
2016-05-13 09:51:50	1300200293	1		1956-04-28	福建省肿瘤医院	二区 胸部肿瘤外科	2014-05-22		0	0	0	0	0	0	0	0	0	0	0	0	0	0	0	0	0	0	0	0	0	0	0	0	0		0	0						0	0	0	0	0	0
2016-05-19 14:07:36	500700226	1		1953-03-12	邢台市人民医院	肿瘤内科	2013-02-16	-1	0	0	0	0	0	0	0	0	0	0	0	0	0	0	0	0	0	0	0	0	0	0	0	0	0		1	1	1					0	0	2	0	0	0
2016-05-03 10:39:20	1300200248	1		1948-03-15	福建省肿瘤医院	干部保健特需病房	2014-05-08		0	0	0	0	0	0	0	0	0	0	0	0	0	0	0	0	0	0	0	0	0	0	0	0	0		0	0						0	0	0	0	0	0
2016-05-04 10:53:09	1300200344	1		1954-09-30	福建省肿瘤医院	干部保健特需病房	2014-06-17		0	0	0	0	0	0	0	0	0	0	0	0	0	0	0	0	0	0	0	0	0	0	0	0	0		1	3	1				1	0	7	35	0	1	7		1
2016-05-10 16:06:26	1300200821	1		1947-07-26	福建省肿瘤医院	干部保健特需病房	2015-03-17		0	0	0	0	0	0	0	1	0	0	0	0	0	0	0	0	0	0	0	0	0	0	0	0	0		0	0						0	0	0	0	1	7	1	1
2016-05-13 15:13:50	1300200055	1		1953-10-25	福建省肿瘤医院	七区 胃肠肿瘤外科	2014-01-21		0	0	0	0	0	0	0	0	0	0	0	0	0	0	0	0	0	0	0	0	0	0	0	0	0		0	0						0	0	0	0	0	0
2015-02-13 15:15:06	400100500	2		1966-05-24	重庆大坪医院	胃结直肠外科	2015-01-18	-1	0	0	0	0	0	0	0	0	0	0	0	0	0	0	0	0	1	0	0	0	0	0	0	0	0		0	0						0	0	0	0	0	0
2016-05-11 16:22:30	1300201014	2		1972-01-24	福建省肿瘤医院	干部保健特需病房	2015-07-20		0	0	0	0	0	0	0	0	0	0	0	0	0	0	0	0	0	0	0	0	0	0	0	0	0		0	0						0	0	0	0	0	0
2018-12-28 18:30:35	800107360	1		1952-08-18	吉林大学白求恩第一医院	肿瘤中心	2017-12-13	-1	0	0	0	0	0	0	1	0	0	0	0	0	0	1	0	0	0	0	0	0	0	1	0	0	0	4	1	3	1					0	0	15	0	0	0
2016-05-11 10:01:34	1300200927	1		1970-02-05	福建省肿瘤医院	干部保健特需病房	2015-06-15		0	0	0	0	0	0	0	0	0	0	0	0	0	0	0	0	0	0	0	0	0	0	0	0	0		0	0						0	0	0	0	0	0
2015-08-28 16:41:58	400200015	2		1943-02-26	重庆市第三人民医院	普外科	2015-05-18	-1	0	0	0	0	0	0	0	0	0	0	0	0	0	0	0	0	0	0	0	0	0	0	0	0	0	-1	0	0						0	0	0	0	0	0
2016-06-21 17:06:57	1300201274	1		1950-07-24	福建省肿瘤医院	干部保健特需病房	2016-03-30		0	0	0	0	0	0	0	1	0	0	0	0	0	0	0	0	0	0	0	0	0	0	0	0	0		0	0						0	0	0	0	0	0
2015-04-26 21:08:31	800103686	1		1954-08-19	吉林大学白求恩第一医院	胃肠外科	2014-09-23		0	0	0	0	0	0	0	0	0	0	0	0	0	0	0	0	0	0	0	0	0	0	0	0	0	-1	1	7	1					0	0	7	0	0	0
2016-05-10 16:28:43	1300200852	2		1955-08-24	福建省肿瘤医院	干部保健特需病房	2015-03-23		0	0	0	0	0	0	0	0	0	0	0	0	0	0	0	0	0	0	0	0	0	0	0	0	0		0	0						0	0	0	0	0	0
2019-04-16 13:39:16	800108267	2	1	1959-04-20	吉林大学白求恩第一医院	肿瘤中心	2018-06-19	-1	0	0	0	0	0	0	0	0	0	0	0	0	0	0	0	0	0	0	0	0	1	1	0	0	0	4	0	0						0	0	0	0	0	0
2014-02-26 13:26:21	800100406	2		1968-07-12	吉林大学白求恩第一医院	肿瘤中心	2013-11-19		0	0	0	0	0	0	0	0	0	0	0	0	0	0	0	0	0	0	0	0	0	0	0	0	0	-1	0	0						0	0	0	0	0	0
2014-04-29 20:55:01	800101360	1		1955-08-28	吉林大学白求恩第一医院	肿瘤中心	2014-03-11		0	0	0	0	0	0	0	0	0	0	0	0	0	0	0	0	0	0	0	0	0	0	0	0	0	-1	0	0						0	0	0	0	0	0
2016-05-13 10:34:32	1300201109	2		1948-12-06	福建省肿瘤医院	干部保健特需病房	2015-08-17		0	0	0	0	0	0	0	0	0	0	0	0	0	0	0	0	0	0	0	0	0	0	0	0	0		0	0						0	0	0	0	0	0
2017-01-20 10:45:23	1300201487	2	1	1955-03-06	福建省肿瘤医院	干部保健特需病房	2017-01-05		0	0	0	0	0	0	0	0	0	0	0	0	0	0	0	0	0	0	0	0	1	0	0	0	0		0	0						0	0	0	0	0	0
2014-12-08 15:05:06	800102854	1		1944-04-20	吉林大学白求恩第一医院	胃肠外科	2014-08-12	-1	0	0	0	0	0	0	0	0	0	0	0	0	0	0	0	0	0	0	0	0	0	0	0	0	0	-1	0	0						0	0	0	0	0	0
2016-05-03 11:35:40	1300200287	1		1956-12-01	福建省肿瘤医院	三十一区 腹部肿瘤内科	2014-05-20		0	0	0	0	0	0	0	0	0	0	0	0	0	0	0	0	0	0	0	0	0	0	0	0	0		1	7	1					0	0	55	0	0	0
2016-05-10 16:11:59	1300200825	1		1956-10-29	福建省肿瘤医院	三十一区 腹部肿瘤内科	2015-03-09		0	0	0	0	0	0	0	1	0	0	0	0	0	0	0	0	0	0	0	0	0	0	0	0	0		1	7				1		0	0	14	0	1	7	1	1
2016-10-08 10:51:31	1300201388	1		1971-06-07	福建省肿瘤医院	干部保健特需病房	2016-08-29		0	0	0	0	0	0	0	0	0	0	0	0	0	0	0	0	0	0	0	0	1	0	0	0	0		0	0						0	0	0	0	1	2		1
2016-05-12 10:23:02	1300201062	2		1974-02-04	福建省肿瘤医院	干部保健特需病房	2015-09-10		0	0	0	0	0	0	0	0	0	0	0	0	0	0	0	0	0	0	0	0	0	0	0	0	0		0	0						0	0	0	0	0	0
2016-05-10 16:18:55	1300200838	1		1952-05-24	福建省肿瘤医院	七区 胃肠肿瘤外科	2015-02-27		0	0	0	0	0	0	0	0	0	0	0	0	0	0	0	0	0	0	0	0	0	1	0	0	0		0	0						0	0	0	0	0	0
2016-10-08 11:19:35	1300201391	1		1982-07-03	福建省肿瘤医院	干部保健特需病房	2016-09-05		0	0	0	0	0	0	0	0	0	0	0	0	0	0	0	0	0	0	0	0	1	0	0	0	0	-1	0	0						0	0	0	0	0	0
2015-09-01 10:22:50	2400100061	2		1963-02-03	西京医院	胃肠外科	2014-06-08	-1	0	0	0	0	0	0	0	1	0	0	0	0	0	0	0	0	0	0	0	0	1	0	0	0	0	-1	0	0						0	0	0	0	0	0
2018-07-19 14:36:27	1300202419	2	1	1963-04-16	福建省肿瘤医院	干部保健特需病房	2018-07-16	-1	0	0	0	0	0	0	0	0	0	0	0	0	0	0	0	0	0	0	0	0	1	0	0	0	0	4	0	0						0	0	0	0	0	0
2014-09-16 13:22:47	800102606	1		1959-03-15	吉林大学白求恩第一医院	肿瘤中心	2014-05-14		0	0	0	0	0	0	0	0	0	0	0	0	0	0	0	0	0	0	0	0	0	0	0	0	0	-1	0	0						0	0	0	0	0	0
2016-05-03 11:46:29	1300200296	2		1963-08-21	福建省肿瘤医院	三十一区 腹部肿瘤内科	2014-05-26		0	0	0	0	0	0	0	0	0	0	0	0	0	0	0	0	0	0	0	0	0	1	0	0	0		0	0						0	0	0	0	1	3	1	1
2015-09-06 22:45:31	800104703	1		1950-12-26	吉林大学白求恩第一医院	胃肠外科	2015-06-23		0	0	0	0	0	0	0	0	0	0	0	0	0	0	0	0	0	0	0	0	0	0	0	0	0	-1	0	0						0	0	0	0	0	0
2015-08-05 00:20:02	800104115	2		1952-12-02	吉林大学白求恩第一医院	胃肠外科	2015-07-03		0	0	0	0	0	0	1	1	0	0	0	0	0	0	0	0	0	0	0	0	0	0	0	0	0	-1	0	0						0	0	0	0	0	0
2017-03-28 22:13:26	800105908	1		1958-02-20	吉林大学白求恩第一医院	胃肠外科	2016-01-05		0	0	0	0	0	0	0	1	1	0	0	0	0	0	0	0	0	0	0	0	0	1	0	0	0	4	1	1	1		1			2	0	5	0	0	0
2016-05-11 09:21:01	1300200897	2		1976-06-16	福建省肿瘤医院	干部保健特需病房	2015-04-16		0	0	0	0	0	0	0	0	0	0	0	0	0	0	0	0	0	0	0	0	0	0	0	0	0		0	0						0	0	0	0	0	0
2018-06-14 11:57:41	800106602	2	1	1954-06-06	吉林大学白求恩第一医院	肿瘤中心	2017-08-01	-1	0	0	0	0	0	0	0	0	0	0	0	0	0	0	0	0	0	0	0	0	1	1	0	0	0	4	0	0						0	0	0	0	0	0
2017-02-21 11:19:52	800105592	1		1954-03-12	吉林大学白求恩第一医院	胃肠外科	2016-01-16		0	0	0	0	0	0	0	0	0	0	0	0	0	0	0	0	0	0	0	0	1	0	0	0	0	4	0	0						0	0	0	0	1	14		1
2016-05-13 15:08:44	1300200022	2		1983-03-15	福建省肿瘤医院	干部保健特需病房	2014-03-13		0	0	0	0	0	0	0	0	0	0	0	0	0	0	0	0	0	0	0	0	0	0	0	0	0		0	0						0	0	0	0	0	0
2018-12-05 11:18:22	2300102535	2	1	1963-05-10	昆明医科大学第一附属医院	普外一科（胃肠与疝外科）	2018-11-13	-1	0	0	0	0	0	0	0	1	0	0	0	0	0	0	0	0	0	0	0	0	0	0	0	0	0	4	0	0						0	0	0	0	0	0
2015-04-18 22:08:04	800103610	2		1978-11-10	吉林大学白求恩第一医院	肿瘤中心	2015-03-17		0	0	0	0	0	0	0	0	0	0	0	0	0	0	0	0	0	0	0	0	0	0	0	0	0	-1	0	0						0	0	0	0	0	0
2016-05-16 11:26:25	800104552	1		1949-11-12	吉林大学白求恩第一医院	胃肠外科	2015-05-18		0	0	0	0	0	0	0	0	0	0	0	0	0	0	0	0	0	0	0	0	0	0	0	0	0	-1	0	0						0	0	0	0	0	0
2017-07-13 09:36:56	1300201611	2	1	1948-06-02	福建省肿瘤医院	干部保健特需病房	2017-07-13		0	0	0	0	0	0	0	0	0	0	0	0	0	0	0	0	0	0	0	0	1	0	0	0	0	4	0	0						0	0	0	0	0	0
2017-09-30 10:47:46	1300201768	1		1956-06-29	福建省肿瘤医院	干部保健特需病房	2017-09-26		0	0	0	0	0	0	0	0	0	0	0	0	0	0	0	0	0	0	0	0	1	0	0	0	0	4	0	0						0	0	0	0	1	5
2019-12-01 09:33:08	800109436	1		1958-02-23	吉林大学白求恩第一医院	肿瘤中心	2019-02-20	-1	0	0	0	0	0	0	0	0	0	0	0	0	0	0	0	0	0	0	0	0	1	0	0	0	0	4	0	0						0	0	0	0	1	5	1	1
2016-05-13 15:24:38	1300200134	1		1965-09-17	福建省肿瘤医院	三十一区 腹部肿瘤内科	2014-03-28		0	0	0	0	0	0	0	1	0	0	0	1	0	0	0	0	0	0	0	0	0	0	0	0	0		0	0						0	0	0	0	0	0
2016-05-11 09:55:38	1300200921	2		1964-06-06	福建省肿瘤医院	三十一区 腹部肿瘤内科	2015-05-05		0	1	0	0	0	0	0	0	0	0	0	0	0	0	0	0	0	0	0	0	0	0	0	0	0		0	0						0	0	0	0	0	0
2016-08-30 10:54:48	400101458	1		1956-12-07	重庆大坪医院	胃结直肠外科	2016-03-26		0	0	0	0	0	0	0	0	0	0	0	0	0	0	0	0	1	0	0	0	0	0	0	0	0	-1	0	0						0	0	0	0	0	0
2018-03-16 09:56:58	1300202221	1		1957-01-18	福建省肿瘤医院	三十一区 腹部肿瘤内科	2018-02-23	-1	0	0	0	0	0	0	0	0	0	0	0	0	0	0	0	0	0	0	0	0	1	0	0	0	0	4	0	0						0	0	0	0	0	0
2018-05-29 20:15:04	400102727	1		1956-06-09	重庆大坪医院	胸外科	2018-03-02	-1	0	0	0	0	0	0	0	0	0	0	0	0	0	0	0	0	0	0	0	0	1	0	0	0	0	4	0	0						0	0	0	0	0	0
2016-05-06 11:07:15	1300200475	1		1950-07-13	福建省肿瘤医院	七区 胃肠肿瘤外科	2014-06-04		0	0	0	0	0	0	0	1	0	0	0	0	0	0	0	0	0	0	0	0	0	0	0	0	0		0	0						0	0	0	0	0	0
2015-03-28 23:36:16	800103317	1		1952-07-10	吉林大学白求恩第一医院	肿瘤中心	2015-03-09		0	0	0	0	0	0	0	0	0	0	0	0	0	0	0	0	0	0	0	0	0	0	0	0	0	-1	1	7	1					0	0	35	0	0	0
2015-10-27 23:22:16	800104946	1		1960-09-06	吉林大学白求恩第一医院	肿瘤中心	2015-07-28		0	0	0	0	0	0	0	0	0	0	0	0	0	0	0	0	0	0	0	0	0	0	0	0	0	-1	0	0						0	0	0	0	0	0
2016-05-16 13:14:54	800104814	1		1950-04-04	吉林大学白求恩第一医院	胃肠外科	2015-05-12		0	0	0	0	0	0	0	0	0	0	0	0	0	0	0	0	0	0	0	0	0	0	0	0	0	-1	1	7	1					0	0	21	0	0	0
2015-02-04 19:41:52	800103194	2		1949-07-11	吉林大学白求恩第一医院	胃肠外科	2014-07-25	-1	0	0	0	0	0	0	1	0	0	0	0	0	0	0	0	0	0	0	0	0	0	0	0	0	0	-1	0	0						0	0	0	0	0	0
2018-06-15 16:00:46	1300202372	1		1981-03-01	福建省肿瘤医院	干部保健特需病房	2018-06-13	-1	0	0	0	0	0	0	0	0	0	0	0	0	0	0	0	0	0	0	0	0	1	0	0	0	0	4	0	0						0	0	0	0	1	14	1	1
2019-12-17 20:46:16	2800400312	1		1964-12-27	广西医科大学一附院	胃肠腺体外科	2019-05-27	-1	0	0	0	0	0	0	1	0	0	0	0	0	0	0	0	0	0	0	0	0	0	0	0	0	0	4	0	0						0	0	0	0	1	2	1
2016-05-03 11:09:21	400200101	2		1956-07-12	重庆市第三人民医院	普外科	2015-05-08	-1	0	0	0	0	0	0	0	0	0	0	0	0	0	0	0	0	0	0	0	0	0	0	0	0	0	-1	0	0						0	0	0	0	0	0
2014-06-23 20:20:33	800101875	2		1960-08-18	吉林大学白求恩第一医院	胃肠外科	2014-03-18		0	0	0	0	0	0	0	0	0	0	0	0	0	0	0	0	0	0	0	0	0	0	0	0	0	-1	0	0						0	0	0	0	0	0
2016-05-13 09:24:56	1300200199	2		1945-05-25	福建省肿瘤医院	二区 胸部肿瘤外科	2014-04-14		0	0	0	0	0	0	1	0	0	0	0	0	0	0	0	0	0	0	0	0	0	0	0	0	0		0	0						0	0	0	0	0	0
2015-05-04 14:49:57	100200105	1		1945-06-30	北京肿瘤医院	消化肿瘤内科	2015-03-27	-1	0	0	0	1	0	0	0	1	0	0	0	0	0	0	0	0	0	0	0	0	0	0	0	0	0		0	0						0	0	0	0	0	0
2016-05-13 10:32:59	1300200770	1		1966-11-24	福建省肿瘤医院	三十一区 腹部肿瘤内科	2015-02-25		0	0	0	0	0	0	0	0	0	0	0	0	0	0	0	0	0	0	0	0	0	1	0	0	0		0	0						0	0	0	0	0	0
2016-05-13 15:03:12	1300201199	1		1990-06-24	福建省肿瘤医院	干部保健特需病房	2015-12-23		0	0	0	0	0	0	0	0	0	0	0	0	0	0	0	0	1	0	0	0	0	0	0	0	0		0	0						0	0	0	0	1	7		1
2016-01-20 10:43:34	400200325	2		1950-08-27	重庆市第三人民医院	普外科	2015-12-08	-1	0	0	0	1	0	0	0	1	1	0	0	0	0	0	0	0	0	0	0	0	0	0	0	0	0	-1	0	0						0	0	0	0	0	0
2016-05-10 10:19:09	1300200718	2		1973-04-18	福建省肿瘤医院	三十一区 腹部肿瘤内科	2014-11-26		0	0	0	0	0	0	0	0	0	0	0	0	0	0	0	0	0	0	0	0	0	0	0	0	0		0	0						0	0	0	0	0	0
2016-05-10 09:52:02	1300200690	1		1981-07-22	福建省肿瘤医院	干部保健特需病房	2014-12-03		0	0	0	0	0	0	0	0	0	0	0	0	0	0	0	0	0	0	0	0	0	0	0	0	0		0	0						0	0	0	0	0	0
2016-03-25 12:19:19	800105228	1		1948-07-28	吉林大学白求恩第一医院	肿瘤中心	2015-08-17		0	0	0	0	0	0	0	0	0	0	0	0	0	0	0	0	0	0	0	0	0	0	0	0	0		0	0						0	0	0	0	1	3	1
2016-05-12 10:34:11	1300201085	1		1945-12-27	福建省肿瘤医院	干部保健特需病房	2015-07-21		0	0	0	0	0	0	0	0	0	0	0	0	0	0	0	0	0	0	0	0	0	0	0	0	0		0	0						0	0	0	0	0	0
2016-06-27 14:59:55	1300201287	1		1950-04-24	福建省肿瘤医院	干部保健特需病房	2016-04-18		0	0	0	0	0	0	0	1	0	0	0	0	0	0	0	0	0	0	0	0	0	0	0	0	0		0	0						0	0	0	0	0	0
2016-12-19 11:40:04	1300201448	1		1951-09-24	福建省肿瘤医院	干部保健特需病房	2016-10-17		0	0	0	0	0	0	0	0	0	0	0	0	0	0	0	0	0	0	0	0	1	0	0	0	0		1	5			1			2.5	0	0	0	1	7	1	1
2017-10-20 15:21:37	1300201808	2	1	1948-11-11	福建省肿瘤医院	干部保健特需病房	2017-09-18		0	0	0	0	0	0	0	0	0	0	0	0	0	0	0	0	0	0	0	0	1	0	0	0	0	4	0	0						0	0	0	0	0	0
2018-06-15 15:31:30	1300202369	1		1952-10-09	福建省肿瘤医院	干部保健特需病房	2018-06-14	-1	0	0	0	0	0	0	0	0	0	0	0	0	0	0	0	0	0	0	0	0	1	0	0	0	0	4	0	0						0	0	0	0	0	0
2019-04-01 14:00:43	800108199	2	1	1963-02-28	吉林大学白求恩第一医院	肿瘤中心	2018-12-26	-1	0	0	0	0	0	0	0	0	0	0	0	0	0	0	0	0	0	0	0	0	1	0	0	0	0	4	0	0						0	0	0	0	0	0
2019-11-15 15:39:09	800108984	1		1969-09-11	吉林大学白求恩第一医院	肿瘤中心	2019-02-27	-1	0	0	0	0	0	0	0	0	0	0	0	0	0	0	0	0	0	0	0	0	1	0	0	0	0	4	0	0						0	0	0	0	0	0
2019-12-15 19:39:33	2800400294	1		1981-06-02	广西医科大学一附院	胃肠腺体外科	2019-11-19	-1	0	0	0	0	0	0	0	0	0	0	0	0	0	0	0	0	0	0	0	0	1	1	0	0	0	4	0	0						0	0	0	0	0	0
2016-05-12 21:12:16	2800400026	2		1983-12-22	广西医科大学一附院	胃肠腺体外科	2015-05-26	-1	0	0	0	0	0	0	0	0	0	0	0	0	0	0	0	0	0	0	0	0	1	1	0	0	0	-1	0	0						0	0	0	0	0	0
2017-03-28 15:20:22	1300201523	2		1980-01-20	福建省肿瘤医院	干部保健特需病房	2017-03-15		0	0	0	0	0	0	0	0	0	0	0	0	0	0	0	0	0	0	0	0	1	0	0	0	0	4	0	0						0	0	0	0	0	0
2014-10-16 10:10:01	2800100628	1		1953-06-04	广西医科大学附属肿瘤医院	胃肠一区	2014-08-25	-1	0	0	0	0	0	0	0	0	0	0	0	0	0	0	0	0	0	0	0	0	0	0	0	0	0	-1	0	0						0	0	0	0	0	0
2015-08-11 18:57:02	800104321	1		1951-10-11	吉林大学白求恩第一医院	胃肠外科	2015-05-28		0	0	0	0	0	0	0	0	0	0	0	0	0	0	0	0	0	0	0	0	0	0	0	0	0	-1	0	0						0	0	0	0	0	0
2015-09-07 20:06:18	800104718	1		1949-10-23	吉林大学白求恩第一医院	胃肠外科	2015-07-10		0	0	0	0	0	0	1	0	0	0	0	0	0	0	0	0	0	0	0	0	0	0	0	0	0	-1	0	0						0	0	0	0	0	0
2016-05-06 15:24:56	1300200535	2		1966-08-08	福建省肿瘤医院	干部保健特需病房	2014-07-29		0	0	0	0	0	0	0	0	0	0	0	0	0	0	0	0	0	0	0	0	0	1	0	0	0		0	0						0	0	0	0	1	7
2016-06-21 16:41:36	1300201268	1		1946-12-20	福建省肿瘤医院	干部保健特需病房	2016-04-21		0	0	0	0	0	0	0	0	0	0	0	0	0	0	0	0	0	0	0	0	1	0	0	0	0		0	0						0	0	0	0	0	0
2017-09-21 09:24:37	1300201736	2	1	1956-04-23	福建省肿瘤医院	干部保健特需病房	2017-09-15		0	0	0	0	0	0	0	0	0	0	0	0	0	0	0	0	0	0	0	0	1	0	0	0	0	4	0	0						0	0	0	0	0	0
2018-10-24 15:19:39	100900420	1		1965-04-24	首都医科大学附属北京世纪坛医院	结直肠肿瘤外科	2018-10-08	-1	0	0	0	0	0	0	0	1	0	0	0	0	0	0	0	0	0	0	0	0	0	0	0	0	0	4	0	0						0	0	0	0	0	0
2015-07-29 16:32:03	1901300118	2		1974-11-15	佛山市第一人民医院	肿瘤内科	2013-07-09		0	0	0	0	0	0	0	0	0	0	0	0	0	0	0	0	0	0	0	0	0	0	0	0	0		0	0						0	0	0	0	0	0
2019-10-21 21:42:52	800108627	1		1973-02-16	吉林大学白求恩第一医院	肿瘤中心	2019-05-30	-1	0	0	0	0	0	0	0	0	0	0	0	0	0	0	0	0	0	0	0	0	1	0	0	0	0	4	0	0						0	0	0	0	0	0
2014-02-26 14:12:10	800100430	2		1989-09-24	吉林大学白求恩第一医院	肿瘤中心	2013-06-28		0	0	0	0	0	0	0	0	0	0	0	0	0	0	0	0	0	0	0	0	0	0	0	0	0	-1	0	0						0	0	0	0	0	0
2016-05-13 15:03:57	1300201201	1		1987-05-13	福建省肿瘤医院	干部保健特需病房	2015-12-22		0	1	0	0	0	0	0	0	0	0	0	0	0	0	0	0	0	0	0	0	0	0	0	0	0		0	0						0	0	0	0	0	0
2017-11-28 10:40:12	1300201907	1		1956-06-11	福建省肿瘤医院	干部保健特需病房	2017-11-08		0	0	0	0	0	0	0	0	0	0	0	0	0	0	0	0	0	0	0	0	1	0	0	0	0	4	1	7			1			0	3	0	0	0	0
2016-05-13 15:15:20	1300200062	2		1949-11-24	福建省肿瘤医院	七区 胃肠肿瘤外科	2014-03-17		0	0	0	0	0	0	0	0	0	0	0	0	0	0	0	0	0	0	0	0	0	0	0	0	0		0	0						0	0	0	0	0	0
2016-05-13 10:57:12	1300201236	1		1958-11-09	福建省肿瘤医院	七区 胃肠肿瘤外科	2016-01-27		0	0	0	0	0	0	0	0	0	0	0	0	0	0	0	0	0	0	0	0	0	0	0	0	0		0	0						0	0	0	0	0	0
2017-03-31 10:27:08	1300201532	1		1953-12-05	福建省肿瘤医院	干部保健特需病房	2016-12-22		0	0	0	0	0	0	0	1	0	0	0	0	0	0	0	0	0	0	0	0	0	0	0	0	0	4	0	0						0	0	0	0	1	7	1	1
2014-07-06 20:10:33	800102038	1		1957-05-12	吉林大学白求恩第一医院	胃肠外科	2014-05-07		0	0	0	0	0	0	0	1	0	0	0	0	0	0	0	0	0	0	0	0	0	0	0	0	0	-1	0	0						0	0	0	0	0	0
2014-12-22 16:01:47	100400056	2		1965-07-08	中国医学科学院肿瘤医院	综合科	2014-12-03		0	0	0	0	0	0	0	0	0	0	0	0	0	0	0	0	0	0	0	0	0	0	0	0	0	-1	0	0						0	0	0	0	0	0
2016-05-10 10:35:41	1300200742	2		1997-03-01	福建省肿瘤医院	干部保健特需病房	2015-01-09		0	0	0	0	0	0	0	0	0	0	0	0	0	0	0	0	0	0	0	0	0	0	0	0	0		0	0						0	0	0	0	0	0
2016-05-12 10:09:49	1300201050	1		1968-07-01	福建省肿瘤医院	干部保健特需病房	2015-09-06		0	0	0	0	0	0	0	0	0	0	0	0	0	0	0	0	0	0	0	0	0	0	0	0	0		0	0						0	0	0	0	0	0
2015-10-20 16:33:42	400200239	1		1963-12-15	重庆市第三人民医院	胸外科	2015-10-08	-1	0	0	0	0	0	0	0	0	0	0	0	0	0	0	0	0	0	0	0	0	0	1	0	0	0	-1	0	0						0	0	0	0	0	0
2017-01-20 10:34:43	1300201486	2	1	1966-12-08	福建省肿瘤医院	干部保健特需病房	2017-01-05		0	0	0	0	0	0	0	0	0	0	0	0	0	0	0	0	0	0	0	0	1	0	0	0	0		0	0						0	0	0	0	0	0
2017-05-26 15:48:10	1300201581	2	1	1963-09-18	福建省肿瘤医院	干部保健特需病房	2017-05-18		0	0	0	0	0	0	0	1	0	0	0	0	0	0	0	0	0	0	0	0	0	0	0	0	0	4	0	0						0	0	0	0	0	0
2018-03-16 11:09:45	1300202223	2		1991-08-01	福建省肿瘤医院	三十一区 腹部肿瘤内科	2018-02-26	-1	0	0	0	0	0	0	0	0	0	0	0	0	0	0	0	0	0	0	0	0	1	0	0	0	0	4	0	0						0	0	0	0	0	0
2018-12-14 10:27:57	1300202617	2		1971-09-26	福建省肿瘤医院	干部保健特需病房	2018-11-26	-1	0	0	0	0	0	0	0	0	0	0	0	0	0	0	0	0	0	0	0	0	1	0	0	0	0	4	0	0						0	0	0	0	0	0
2016-05-13 09:21:26	1300200169	1		1955-12-11	福建省肿瘤医院	二区 胸部肿瘤外科	2014-04-02		0	0	0	0	0	0	0	1	0	0	0	0	0	0	0	0	0	0	0	0	0	0	0	0	0		0	0						0	0	0	0	0	0
2014-02-26 10:56:23	800100352	2		1952-05-20	吉林大学白求恩第一医院	肿瘤中心	2014-01-02		0	0	0	0	0	0	0	0	0	0	0	0	0	0	0	0	0	0	0	0	0	0	0	0	0	-1	0	0						0	0	0	0	0	0
2016-05-13 15:18:44	1300200089	2		1952-01-15	福建省肿瘤医院	七区 胃肠肿瘤外科	2014-02-10		0	0	0	0	0	0	0	1	0	0	0	0	0	0	0	0	0	0	0	0	0	0	0	0	0		0	0						0	0	0	0	0	0
2016-05-11 09:11:17	1300200885	2		1970-01-24	福建省肿瘤医院	三十一区 腹部肿瘤内科	2015-03-26		0	0	0	0	0	0	0	0	0	0	0	0	0	0	0	0	0	0	0	0	0	0	0	0	0		0	0						0	0	0	0	0	0
2016-03-17 10:51:36	400200394	1		1946-09-16	重庆市第三人民医院	肿瘤血液科	2016-02-16	-1	0	0	0	0	0	0	0	1	0	0	0	0	0	0	0	0	0	0	0	0	0	1	0	0	0	-1	1	14	1					0	0	35	0	0	0
2014-12-22 21:55:53	100400052	2		1958-01-03	中国医学科学院肿瘤医院	综合科	2014-12-15		0	0	0	0	0	0	0	0	0	0	0	0	0	0	0	0	0	0	0	0	0	0	0	0	0	-1	0	0						0	0	0	0	0	0
2015-02-16 18:14:41	400100515	2		1967-06-24	重庆大坪医院	胃结直肠外科	2015-01-19	-1	0	0	0	0	0	0	0	0	0	0	0	0	0	0	0	0	0	0	0	0	0	1	0	0	0		0	0						0	0	0	0	0	0
2016-08-24 08:54:59	1300201375	2		1965-06-01	福建省肿瘤医院	干部保健特需病房	2016-08-02		0	0	0	0	0	0	0	0	0	0	0	0	0	0	0	0	0	0	0	0	1	0	0	0	0		0	0						0	0	0	0	0	0
2014-03-03 21:04:01	800100925	1		1953-05-13	吉林大学白求恩第一医院	肿瘤中心	2013-07-01		0	0	0	0	0	0	0	0	0	0	0	0	0	0	0	0	0	0	0	0	0	0	0	0	0	-1	0	0						0	0	0	0	0	0
2016-05-10 11:16:13	1300200771	2		1955-07-11	福建省肿瘤医院	干部保健特需病房	2015-01-15		0	1	0	0	0	0	0	0	0	0	0	0	0	0	0	0	0	0	0	0	0	1	0	0	0		0	0						0	0	0	0	0	0
2016-05-16 16:03:57	1900101273	1		1950-03-18	中山大学第一附属医院	胃肠外科	2015-04-21		0	0	0	0	0	0	0	0	1	0	0	0	0	0	0	0	0	0	0	0	0	0	0	0	0		1	7	1					0	0	10.5	0	0	0
2017-10-27 10:11:18	1300201833	1		1955-11-07	福建省肿瘤医院	干部保健特需病房	2017-08-28		0	0	0	0	0	0	0	0	0	0	0	0	0	0	0	0	1	0	0	0	0	0	0	0	0	4	0	0						0	0	0	0	1	14	1
2018-06-15 16:08:51	1300202373	2		1966-11-01	福建省肿瘤医院	干部保健特需病房	2018-06-12	-1	0	1	0	0	0	0	0	0	0	0	0	0	0	0	0	0	0	0	0	0	0	0	0	0	0	4	0	0						0	0	0	0	0	0
2018-11-19 15:28:13	1300202585	1		1958-05-29	福建省肿瘤医院	干部保健特需病房	2018-11-19	-1	0	0	0	0	0	0	0	0	0	0	0	0	0	0	0	0	0	0	0	0	1	0	0	0	0	4	1	7				1		0	0	7	0	1	1	1
2019-11-23 18:11:35	800109352	2		1974-10-12	吉林大学白求恩第一医院	肿瘤中心	2019-06-14	-1	0	0	0	0	0	0	0	0	0	0	0	0	0	0	0	0	0	0	0	0	1	0	0	0	0	4	0	0						0	0	0	0	0	0
2014-12-04 17:34:53	800102795	1		1960-03-20	吉林大学白求恩第一医院	肿瘤中心	2014-08-07		0	0	0	0	0	0	0	0	0	0	0	0	0	0	0	0	0	0	0	0	0	0	0	0	0	-1	0	0						0	0	0	0	1	7	1
2019-12-01 11:14:10	800109461	2		1983-06-09	吉林大学白求恩第一医院	肿瘤中心	2019-07-03	-1	0	0	0	0	0	0	0	0	0	0	0	0	0	0	0	0	0	0	0	0	1	0	0	0	0	4	0	0						0	0	0	0	0	0
2014-08-10 16:39:05	800102370	2		1955-04-13	吉林大学白求恩第一医院	肿瘤中心	2014-06-15		0	0	0	0	0	0	0	0	0	1	0	0	0	0	0	0	0	0	0	0	0	1	0	0	0	-1	0	0						0	0	0	0	0	0
2016-05-13 15:18:24	1300200087	2		1953-02-16	福建省肿瘤医院	七区 胃肠肿瘤外科	2014-02-14		0	0	0	0	0	0	0	0	0	0	0	0	0	0	0	0	0	0	0	0	0	0	0	0	0		0	0						0	0	0	0	0	0
2016-05-11 16:20:21	1300201012	1		1950-09-25	福建省肿瘤医院	干部保健特需病房	2015-07-20		0	0	0	0	0	0	0	0	0	0	0	0	0	0	0	0	0	0	0	0	0	0	0	0	0		1	7	1					0	0	14	0	1	7	1
2018-12-09 22:00:54	2800400275	1		1964-11-20	广西医科大学一附院	胃肠腺体外科	2018-10-12	-1	0	0	0	0	0	0	0	0	0	0	0	0	0	0	0	0	0	0	0	0	1	0	0	0	0	4	0	0						0	0	0	0	0	0
2015-08-20 12:25:33	1901300131	2		1963-08-20	佛山市第一人民医院	肿瘤内科	2013-06-24		0	0	0	0	0	0	0	0	0	0	0	0	0	0	0	0	0	0	0	0	0	0	0	0	0		0	0						0	0	0	0	0	0
2016-05-10 08:32:33	1300200598	2		1960-04-05	福建省肿瘤医院	二十三区 中西医结合科	2014-09-10		0	0	0	0	0	0	0	0	0	0	0	0	0	0	0	0	0	0	0	0	0	0	0	0	0		0	0						0	0	0	0	0	0
2019-11-22 10:22:06	800109272	2		1981-05-15	吉林大学白求恩第一医院	肿瘤中心	2019-10-14	-1	0	0	0	0	0	0	0	1	0	0	0	0	0	0	0	0	0	0	0	0	0	1	0	0	0	4	0	0						0	0	0	0	0	0
2014-02-26 13:31:20	800100410	1		1945-10-15	吉林大学白求恩第一医院	肿瘤中心	2013-10-22		0	0	0	0	0	0	0	0	0	0	0	0	0	0	0	0	0	0	0	0	0	1	1	3	8	2	0	0						0	0	0	0	0	0
2016-05-12 23:36:25	2800400058	1		1963-05-19	广西医科大学一附院	胃肠腺体外科	2015-08-17	-1	0	0	0	0	0	0	0	0	0	0	0	0	0	0	0	0	0	0	0	0	0	0	1	4	30	1	1	3	1		1			2	0	6	0	0	0
2017-03-03 10:39:40	2400100242	1		1955-08-16	西京医院	胃肠外科	2016-06-22	-1	0	0	0	0	0	0	1	0	0	0	0	0	0	0	0	0	0	0	0	0	0	0	1	7	3	2	0	0						0	0	0	0	0	0
2016-12-22 17:42:22	400101828	1		1955-12-18	重庆大坪医院	胸外科	2016-09-18	-1	0	0	0	0	0	0	0	0	0	0	0	0	0	0	0	0	0	0	0	0	1	0	1	3	40	2	0	0						0	0	0	0	0	0
2017-02-21 09:46:26	2400100167	1		1962-03-28	西京医院	胃肠外科	2016-07-23	-1	0	0	0	0	0	0	0	1	0	0	0	0	0	0	0	0	0	0	0	0	0	0	1	6	20	3	0	0						0	0	0	0	1	2
2017-03-02 18:05:26	2400100233	1		1972-05-03	西京医院	胃肠外科	2016-12-19	-1	0	0	0	0	0	0	0	0	0	0	0	0	0	0	0	0	0	0	0	0	1	0	1	8	24	1	0	0						0	0	0	0	0	0
2017-01-22 10:31:22	2400100110	1		1968-01-28	西京医院	胃肠外科	2016-09-06	-1	0	0	0	0	0	0	0	0	0	0	0	0	0	0	0	0	0	0	0	0	0	0	1	7	20	2	0	0						0	0	0	0	1	3	1
2017-02-23 15:59:31	2400100177	1		1953-12-21	西京医院	胃肠外科	2016-07-11	-1	0	0	0	0	0	0	0	1	0	0	0	0	0	0	0	0	0	0	0	0	0	1	1	3	20	2	0	0						0	0	0	0	0	0
2017-02-27 16:41:00	2400100195	1		1945-02-20	西京医院	胃肠外科	2016-06-27	-1	0	0	0	0	0	0	0	0	0	0	0	0	0	0	0	0	0	0	0	0	0	0	1	3	30	2	0	0						0	0	0	0	0	0
2017-03-02 17:45:31	2400100232	1		1967-02-20	西京医院	胃肠外科	2016-11-08	-1	0	0	0	0	0	0	0	0	0	0	0	0	0	0	0	0	0	0	0	0	1	0	1	1	2	3	0	0						0	0	0	0	1	1
2017-03-03 15:50:02	2400100246	1		1952-04-02	西京医院	胃肠外科	2016-05-06	-1	0	0	0	0	0	0	0	0	0	0	0	0	0	0	0	0	0	0	0	0	1	1	1	7	30	3	0	0						0	0	0	0	1	7	1
2017-02-27 18:25:55	2400100201	1		1966-11-25	西京医院	胃肠外科	2016-06-17	-1	0	1	0	0	0	0	0	0	0	0	0	0	0	0	0	0	0	0	0	0	0	1	1	7	25	2	0	0						0	0	0	0	1	7	1
2017-03-03 15:35:57	2400100245	1		1952-05-29	西京医院	胃肠外科	2016-06-22	-1	0	0	0	0	0	0	0	0	0	0	0	0	0	0	0	0	0	0	0	0	1	0	1	7	40	3	0	0						0	0	0	0	1	7	1
2015-04-17 11:20:23	2400100004	1		1976-08-28	西京医院	胃肠外科	2014-08-28	-1	0	0	0	0	0	0	0	0	0	0	0	0	0	0	0	0	0	0	0	0	0	0	1	7	15	2	1	2			1			9	0	0	0	1	7	1
2021-01-26 09:49:36	2300104288	1		1948-02-19	昆明医科大学第一附属医院	普外一科（胃肠与疝外科）	2021-01-05	-1	0	0	0	0	0	0	0	0	0	0	0	0	0	0	0	0	0	0	0	0	1	0	1	7	25	1	1	7	1					0	0	14	0	1	7	1	1
2020-09-28 19:30:36	2300104080	1		1968-09-21	昆明医科大学第一附属医院	肿瘤外科	2020-08-02	-1	0	0	0	0	0	0	0	0	0	0	0	0	0	0	0	0	0	0	0	0	1	0	1	7	30	2	0	0						0	0	0	0	0	0
2015-03-17 09:05:06	2100100907	1		1969-01-17	四川大学华西医院	肿瘤二	2014-09-22	-1	0	0	0	0	0	0	0	0	0	0	0	0	0	0	0	0	0	0	0	0	0	0	1	7	30		1	7	1					0	0	14	0	0	0
2016-05-13 15:29:01	1300200162	1		1942-12-20	福建省肿瘤医院	干部保健特需病房	2014-04-13		0	0	0	0	0	0	0	0	0	0	0	0	0	0	0	0	1	0	0	0	0	0	1	14	10	3	0	0						0	0	0	0	0	0
2015-03-19 16:04:54	2100101017	1		1955-12-25	四川大学华西医院	肿瘤二	2014-09-01	-1	0	0	0	0	0	0	0	0	0	0	0	0	0	0	0	0	0	0	0	0	0	0	1	14	40		0	0						0	0	0	0	0	0
2017-02-20 10:45:29	2300100861	1		1983-02-13	昆明医科大学第一附属医院	胸外科	2017-02-13	-1	0	0	0	0	0	0	0	0	0	0	0	0	0	0	0	0	0	0	0	0	1	0	1	4	15	2	0	0						0	0	0	0	0	0
2018-08-13 11:07:38	2300102199	1		1955-07-17	昆明医科大学第一附属医院	肿瘤外科	2018-07-17	-1	0	0	0	0	0	0	0	0	0	0	0	0	0	0	0	0	0	0	0	0	1	0	1	1	50	2	0	0						0	0	0	0	0	0
2015-01-15 10:45:24	800103121	1		1963-12-14	吉林大学白求恩第一医院	肿瘤中心	2014-11-10		0	0	0	0	0	0	0	0	0	0	0	0	0	0	0	0	0	0	0	0	0	0	1	2	40	1	1	3	1					0	0	12	0	0	0
2017-03-09 09:26:31	400101956	1		1959-03-01	重庆大坪医院	胸外科	2016-12-08	-1	0	0	0	0	0	0	0	1	0	0	0	0	0	0	0	0	0	0	0	0	0	0	1	4	40	1	1	3	1					0	0	12	0	1	7	1
2018-10-30 11:31:55	2300102431	1		1972-02-28	昆明医科大学第一附属医院	普外一科（胃肠与疝外科）	2018-10-05	-1	0	0	0	0	0	0	0	0	0	0	0	0	0	0	0	0	0	0	0	0	1	0	1	6	15	3	0	0						0	0	0	0	1	7		1
2018-06-09 16:53:57	400102741	1		1954-12-27	重庆大坪医院	胸外科	2018-01-22	-1	0	0	0	0	0	0	0	0	0	0	0	0	0	0	0	0	0	0	0	0	1	0	1	10	40	1	0	0						0	0	0	0	0	0
2014-10-22 14:31:55	2100100453	1		1948-06-26	四川大学华西医院	肿瘤三	2014-07-18	-1	0	0	0	0	0	0	0	0	0	0	0	0	0	0	0	0	0	0	0	0	0	0	1	1	40		0	0						0	0	0	0	0	0
2016-05-03 10:06:39	1300200216	1		1954-12-22	福建省肿瘤医院	七区 胃肠肿瘤外科	2014-04-21		0	0	0	0	0	0	0	1	0	0	0	0	0	0	0	0	0	0	0	0	0	0	1	7	20	1	1	1	1					0	0	3	0	1	7		1
2016-05-03 10:34:14	1300200232	1		1960-09-25	福建省肿瘤医院	七区 胃肠肿瘤外科	2014-04-28		0	0	0	0	0	0	0	0	0	0	0	0	0	0	0	0	0	0	0	0	0	0	1	8	30	1	0	0						0	0	0	0	1	7	1	1
2016-05-13 09:33:59	1300200235	1		1954-06-12	福建省肿瘤医院	七区 胃肠肿瘤外科	2014-04-25		0	0	0	0	0	0	0	0	0	0	0	0	0	0	0	0	0	0	0	0	0	1	1	7	40	2	1	7			1			28	0	0	0	1	7	1
2016-05-03 10:36:18	1300200240	1		1954-05-25	福建省肿瘤医院	七区 胃肠肿瘤外科	2014-04-23		0	0	0	0	0	0	0	0	0	0	0	0	0	0	0	0	0	0	0	0	0	0	1	3	20	2	0	0						0	0	0	0	1	7		1
2016-05-13 10:06:00	1300200471	1		1943-01-01	福建省肿瘤医院	七区 胃肠肿瘤外科	2014-07-01		0	0	0	0	0	0	0	1	0	0	0	0	0	0	0	0	0	0	0	0	0	0	1	1	50	1	0	0						0	0	0	0	0	0
2014-01-18 14:42:58	2800100090	1		1944-02-08	广西医科大学附属肿瘤医院	胃肠二区	2013-04-20	-1	0	0	0	0	0	0	0	1	0	0	0	0	0	0	0	0	1	0	0	0	0	0	1	14	30	2	1	1	1					0	0	2	0	0	0
2015-11-12 12:39:43	800105064	1		1978-11-29	吉林大学白求恩第一医院	肿瘤中心	2015-04-16		0	0	0	0	0	0	0	0	0	0	0	0	0	0	0	0	0	0	0	0	0	0	1	7	17	1	0	0						0	0	0	0	0	0
2014-02-26 13:38:10	800100413	1		1958-03-21	吉林大学白求恩第一医院	肿瘤中心	2013-10-28		0	0	0	0	0	0	0	0	0	0	0	0	0	0	0	0	1	0	0	0	0	0	1	7	23	1	1	7	1		1			7	0	21	0	0	0
2014-02-26 12:45:29	800100383	2		1968-10-16	吉林大学白求恩第一医院	肿瘤中心	2013-11-27		0	1	0	0	0	0	0	0	0	0	0	0	0	0	0	0	0	0	0	0	0	1	1	4	14	1	0	0						0	0	0	0	1	7	1
2015-04-17 11:35:58	2400100019	1		1966-04-13	西京医院	胃肠外科	2014-10-31	-1	0	0	0	0	0	0	0	0	0	0	0	0	0	0	0	0	0	0	0	0	1	0	1	7	25	2	1	3	1		1			3	0	2	0	1	7	1
2014-02-26 13:17:46	800100400	1		1969-03-04	吉林大学白求恩第一医院	肿瘤中心	2013-11-06		0	0	0	0	0	0	0	0	0	0	0	0	0	0	0	0	0	0	0	0	0	0	1	7	25	1	0	0						0	0	0	0	1	7	1	1
2015-03-18 23:16:46	300100021	1		1949-06-11	上海瑞金医院	外科三病区	2014-09-05	-1	0	0	0	0	0	0	0	1	0	0	0	0	0	0	0	0	0	0	0	0	0	0	1	14	40		1	14	1					0	0	0	0	1	7		1
2014-06-19 14:28:53	2800100468	1		1969-10-06	广西医科大学附属肿瘤医院	胃肠一区	2014-06-19	-1	0	0	0	0	0	0	0	0	0	0	0	0	0	0	0	0	0	0	0	0	0	0	1	1	20	2	1	1	1					0	0	3	0	0	0
2014-11-21 15:43:22	2400100015	1		1956-01-10	西京医院	胃肠外科	2014-10-29	-1	0	0	0	0	0	0	0	0	0	0	0	0	0	0	0	0	0	0	0	0	0	0	1	14	20	2	0	0						0	0	0	0	1	1	1	1
2015-04-01 10:07:29	2400100032	1		1958-09-01	西京医院	胃肠外科	2014-11-24	-1	0	0	0	0	0	0	0	0	0	0	0	0	0	0	0	0	0	0	0	0	1	0	1	21	30	2	0	0						0	0	0	0	1	21	1
2015-05-04 10:21:43	2400100051	1		1956-03-27	西京医院	胃肠外科	2014-10-28	-1	0	0	0	0	0	0	0	0	0	0	0	0	0	0	0	0	0	0	0	0	0	0	1	14	18	2	0	0						0	0	0	0	0	0
2015-03-01 21:12:43	1200100095	1		1953-12-25	安徽省肿瘤医院	肿三	2015-02-23	-1	0	0	0	0	0	0	0	0	0	0	0	0	0	0	0	0	0	0	0	0	0	0	1	21	37	2	1	7	1					0	0	21	0	1	35	1
2013-09-22 09:24:52	1900100195	1		1948-01-04	中山大学第一附属医院	胃肠外科	2013-01-04	-1	0	0	0	0	0	0	0	0	0	0	0	0	0	0	0	0	0	0	0	0	0	0	1	2	2	3	0	0						0	0	0	0	0	0
2015-03-16 10:43:58	2100100879	1		1954-07-07	四川大学华西医院	肿瘤二	2014-09-01	-1	0	0	0	0	0	0	0	0	0	0	0	0	0	0	0	0	0	0	0	0	0	0	1	7	20		0	0						0	0	0	0	1	14	1
2015-03-11 14:48:28	300100124	1		1945-12-03	上海瑞金医院	外科三病区	2014-11-11	-1	0	0	0	0	0	0	0	1	0	0	0	0	0	0	0	0	0	0	0	0	0	0	1	2	30		0	0						0	0	0	0	0	0
2015-03-19 09:49:49	300100130	1		1961-11-14	上海瑞金医院	外科三病区	2014-11-16	-1	0	0	0	0	0	0	0	0	0	0	0	0	0	0	0	0	0	0	0	0	0	0	1	5	30		0	0						0	0	0	0	0	0
2015-03-30 17:01:57	2400100028	1		1993-08-09	西京医院	胃肠外科	2014-11-27	-1	0	0	0	0	0	0	0	0	0	0	0	0	0	0	0	0	0	0	0	0	1	0	1	7	30	2	0	0						0	0	0	0	0	0
2015-03-11 14:47:18	300100117	1		1948-06-10	上海瑞金医院	外科三病区	2014-11-07	-1	0	0	0	0	0	0	0	1	0	0	0	0	0	0	0	0	0	0	0	0	0	0	1	5	50		1	7						0	7	0	0	1	7	1
2013-10-09 16:14:14	1900100263	1		1953-07-15	中山大学第一附属医院	胃肠外科	2013-02-23	-1	0	0	0	0	0	0	0	0	0	0	0	0	0	0	0	0	0	0	0	0	0	0	1	4	30	1	0	0						0	0	0	0	1	20
2015-03-11 15:08:51	300100154	1		1944-04-14	上海瑞金医院	外科四病区	2014-11-24	-1	0	0	0	0	0	0	0	1	0	0	0	0	0	0	0	0	0	0	0	0	0	0	1	7	45		0	0						0	0	0	0	1	7	1
2015-03-11 11:04:16	300100189	1		1959-09-02	上海瑞金医院	外科三病区	2014-12-26	-1	0	0	0	0	0	0	0	0	0	0	0	0	0	0	0	0	0	0	0	0	0	0	1	2	35		1	2	1					0	0	4	0	1	7	1	1
2015-01-08 11:26:19	2400100022	1		1950-12-30	西京医院	胃肠外科	2014-12-23	-1	0	0	0	0	0	0	0	0	0	0	0	0	0	0	0	0	0	0	0	0	0	0	1	7	40	2	1	2	1					0	0	2	0	1	7	1
2014-02-26 14:28:19	800100438	1		1968-03-26	吉林大学白求恩第一医院	肿瘤中心	2013-10-23		0	0	0	0	0	0	0	0	0	0	0	0	0	0	0	0	0	0	0	0	0	1	1	7	25	1	1	7	1					0	0	20	0	0	0
2014-05-20 20:15:33	800101450	1		1963-09-27	吉林大学白求恩第一医院	胃肠外科	2014-03-02		0	0	0	0	0	0	0	0	0	1	0	0	0	0	0	0	0	0	0	0	0	1	1	2	30	1	1	3	1					0	0	5	0	1	7	1
2014-07-25 20:40:02	800102226	1		1959-01-01	吉林大学白求恩第一医院	胃肠外科	2014-03-06	-1	0	0	0	0	0	0	0	1	0	0	0	0	0	0	0	0	0	0	0	0	0	0	1	7	6	2	0	0						0	0	0	0	0	0
2017-06-29 15:29:38	800105952	1		1967-11-28	吉林大学白求恩第一医院	肿瘤中心	2015-10-15	-1	0	0	0	0	0	0	0	0	0	0	0	0	0	0	0	0	0	0	0	0	1	0	1	7	20	3	0	0						0	0	0	0	0	0
2014-04-12 19:34:53	800101163	1		1961-01-07	吉林大学白求恩第一医院	胃肠外科	2014-03-28	-1	0	0	0	0	0	0	0	0	0	0	1	0	0	0	0	0	0	0	0	0	0	0	1	3	30	1	1	2	1		1			1	0	4	0	1	3	1	1
2014-06-26 18:59:02	800101895	1		1953-11-15	吉林大学白求恩第一医院	胃肠外科	2014-04-07		0	0	0	0	0	0	0	0	0	0	0	0	0	0	0	0	0	0	0	0	0	0	1	7	30	1	0	0						0	0	0	0	0	0
2014-07-05 17:20:00	800102017	1		1962-02-18	吉林大学白求恩第一医院	胃肠外科	2014-05-06		0	0	0	0	0	0	0	0	0	0	0	0	0	0	0	0	0	0	0	0	0	0	1	7	25	1	1	7			1			7	0	0	0	0	0
2014-09-09 15:55:13	800102558	1		1952-05-21	吉林大学白求恩第一医院	胃肠外科	2014-04-29		0	0	0	0	0	0	0	0	0	0	0	0	0	0	0	0	0	0	0	0	0	0	1	2	18	1	0	0						0	0	0	0	0	0
2016-05-06 17:46:30	1200100297	1		1948-12-05	安徽省肿瘤医院	肿三	2015-07-04	-1	0	0	0	0	0	0	0	0	1	0	0	0	0	0	0	0	0	0	0	0	0	1	1	7	40	3	0	0						0	0	0	0	0	0
2015-09-15 17:25:38	2400100067	1		1951-06-17	西京医院	胃肠外科	2015-06-10	-1	0	0	0	0	0	0	0	0	0	0	0	0	0	0	0	0	0	0	0	0	1	0	1	3	30	2	0	0						0	0	0	0	1	7	1	1
2015-09-15 17:42:59	2400100068	1		1958-12-06	西京医院	胃肠外科	2015-09-15	-1	0	0	0	0	0	0	0	0	0	0	0	0	0	0	0	0	0	0	0	0	0	0	1	7	30	1	0	0						0	0	0	0	0	0
2015-02-04 20:19:43	800103196	1		1960-06-18	吉林大学白求恩第一医院	胃肠外科	2014-07-23	-1	0	0	0	0	0	0	0	1	0	0	0	0	0	0	0	0	0	0	0	0	0	1	1	7	20	1	1	7	1					0	0	42	0	0	0
2016-01-27 22:21:30	2800400106	1		1952-06-20	广西医科大学一附院	胃肠腺体外科	2015-10-26	-1	0	0	0	0	0	0	0	0	0	0	0	0	0	0	0	0	0	0	0	0	1	0	1	4	40	2	1	7	1					0	0	30	0	0	0
2015-01-06 15:58:54	800103056	1		1957-08-23	吉林大学白求恩第一医院	胃肠外科	2014-09-02		0	0	0	0	0	0	0	0	0	0	0	0	0	0	0	0	0	0	0	0	0	0	1	7	40	1	1	7	1					0	0	42	0	0	0
2015-03-22 20:14:40	800103266	1		1954-08-26	吉林大学白求恩第一医院	胃肠外科	2014-09-22	-1	0	0	0	0	0	0	0	0	0	0	0	0	0	0	0	0	0	0	0	0	0	0	1	7	20	1	0	0						0	0	0	0	0	0
2014-07-05 14:28:53	800102012	1		1960-04-01	吉林大学白求恩第一医院	肿瘤中心	2014-01-12	-1	0	0	0	0	0	0	1	0	0	0	0	0	0	0	0	0	0	0	0	0	0	0	1	14	30	1	1	7	1		1			3	0	14	0	0	0
2014-07-12 17:28:47	800102143	1		1953-03-12	吉林大学白求恩第一医院	胃肠外科	2014-03-24		0	0	0	0	0	0	1	0	1	0	0	0	0	0	0	0	0	0	0	0	0	0	1	3	40	1	0	0						0	0	0	0	0	0
2015-08-27 15:20:39	400200057	1		1948-08-01	重庆市第三人民医院	普外科	2015-05-13	-1	0	0	0	0	0	0	0	1	0	0	0	0	0	0	0	0	0	0	0	0	0	0	1	7	43	2	1	7	1		1			15	0	20	0	0	0
2016-05-19 12:31:53	500700116	1		1963-04-02	邢台市人民医院	肿瘤外科	2014-11-25	-1	0	0	0	0	0	0	0	0	0	0	0	0	0	0	0	0	0	0	0	0	0	0	1	5	20	2	0	0						0	0	0	0	0	0
2016-05-13 15:19:51	1300200097	1		1943-05-23	福建省肿瘤医院	干部保健特需病房	2014-03-24		0	0	0	0	0	0	0	1	1	0	0	0	0	0	1	0	0	0	0	0	0	0	1	7	50	2	0	0						0	0	0	0	1	7		1
2014-04-29 20:33:20	800101356	1		1977-01-01	吉林大学白求恩第一医院	胃肠外科	2014-03-23		0	0	0	0	0	0	0	0	0	0	0	0	0	0	0	0	0	0	0	0	0	0	1	7	10	3	0	0						0	0	0	0	0	0
2014-12-27 18:09:33	800102972	1		1955-07-21	吉林大学白求恩第一医院	胃肠外科	2014-11-16		0	0	0	0	0	0	0	0	0	0	0	0	0	0	0	0	0	0	0	0	0	0	1	10	30	1	1	7	1					0	0	35	0	0	0
2016-03-29 15:59:10	1200100744	1		1957-01-20	安徽省肿瘤医院	肿三	2016-03-23	-1	0	0	0	0	0	0	0	0	0	0	0	0	0	0	0	0	0	0	0	0	0	0	1	7	35	2	1	7	1					0	0	35	0	0	0
2014-07-21 15:28:08	1900100983	1		1986-02-12	中山大学第一附属医院	胃肠外科	2014-07-02		0	0	0	0	0	0	0	0	0	0	0	0	0	0	0	0	0	0	0	0	0	0	1	7	11	3	0	0						0	0	0	0	0	0
2016-05-13 10:01:47	2300100288	1		1960-09-16	昆明医科大学第一附属医院	普外一科（胃肠与疝外科）	2015-09-16	-1	0	0	0	0	0	0	0	0	0	0	0	0	0	0	0	0	0	0	0	0	0	0	1	7	40	2	0	0						0	0	0	0	0	0
2015-04-12 22:17:14	800103492	1		1951-02-11	吉林大学白求恩第一医院	胃肠外科	2015-01-15	-1	0	0	0	0	0	0	0	0	0	0	0	0	1	0	0	0	0	0	0	0	0	1	1	1	20	1	1	7	1					0	0	21	0	1	2	1
2015-05-10 23:39:21	800103726	1		1960-05-20	吉林大学白求恩第一医院	胃肠外科	2015-01-08	-1	0	0	0	0	0	0	0	0	0	0	0	0	0	0	0	0	0	0	0	0	0	0	1	11	40	1	0	0						0	0	0	0	1	14
2015-03-19 09:14:35	300100053	1		1962-01-04	上海瑞金医院	外科三病区	2014-09-20	-1	0	0	0	0	0	0	0	1	0	0	0	0	0	0	0	0	0	0	0	0	0	0	1	9	30		1	14	1					0	0	40	0	0	0
2015-08-27 14:54:30	400200061	1		1946-05-04	重庆市第三人民医院	普外科	2015-05-13	-1	0	0	0	0	0	0	1	1	0	0	0	0	0	0	0	0	0	0	0	0	0	1	1	7	14	3	0	0						0	0	0	0	1	7	1
2015-02-03 16:48:18	800103174	1		1956-02-24	吉林大学白求恩第一医院	胃肠外科	2014-07-22	-1	0	0	0	0	0	0	0	1	0	0	0	0	0	0	0	0	0	0	0	0	0	0	1	7	40	1	1	7	1					0	0	35	0	0	0
2015-05-30 23:29:51	800103744	1		1962-04-23	吉林大学白求恩第一医院	胃肠外科	2015-03-05	-1	0	0	0	0	0	0	0	0	0	0	0	0	0	0	0	0	0	0	0	0	0	0	1	14	20	1	1	3	1					5	0	10	0	0	0
2015-07-21 19:35:04	800103865	1		1972-03-14	吉林大学白求恩第一医院	胃肠外科	2015-03-19		0	0	0	0	0	0	0	1	0	0	0	0	0	0	0	0	0	0	0	0	0	0	1	7	30	1	1	7	1					0	0	56	0	0	0
2016-04-19 16:39:14	1200100829	1		1957-09-10	安徽省肿瘤医院	肿四	2016-04-10	-1	0	0	0	0	0	0	0	1	0	0	0	0	0	0	0	0	0	0	0	0	0	1	1	7	15	2	0	0						0	0	0	0	1	14	1
2017-03-06 09:11:32	2400100253	1		1963-11-01	西京医院	胃肠外科	2016-06-06	-1	0	0	0	0	0	0	0	0	0	0	0	0	0	0	0	0	0	0	0	0	0	0	1	7	30	4	0	0						0	0	0	0	0	0
2014-02-26 11:19:35	800100364	1		1953-02-14	吉林大学白求恩第一医院	肿瘤中心	2013-12-20		0	0	0	0	0	0	0	0	0	0	0	0	0	0	0	0	0	0	0	0	0	0	1	3	25	1	0	0						0	0	0	0	1	7	1
2015-07-20 22:13:48	800103840	1		1956-04-28	吉林大学白求恩第一医院	胃肠外科	2015-03-31	-1	0	0	0	0	0	0	0	0	0	0	0	0	1	0	0	0	0	0	0	0	0	0	1	2	40	1	1	7	1					0	0	14	0	1	7
2014-12-31 15:44:16	400100331	1		1953-01-19	重庆大坪医院	肿瘤科	2014-12-16		0	0	0	0	0	0	0	0	0	0	0	0	0	0	0	0	0	0	0	0	0	0	1	7	30	3	0	0						0	0	0	0	1	1	1
2015-09-23 12:57:51	800104779	1		1964-02-19	吉林大学白求恩第一医院	胃肠外科	2015-05-24		0	0	0	0	0	0	0	0	0	0	0	0	0	0	0	0	0	0	0	0	0	0	1	7	40	1	0	0						0	0	0	0	0	0
2015-08-02 03:57:17	800104004	1		1950-08-11	吉林大学白求恩第一医院	胃肠外科	2015-05-10		0	0	0	1	0	0	0	0	0	0	0	0	0	0	0	0	0	0	0	0	0	0	1	20	30	1	0	0						0	0	0	0	1	4	1
2015-11-05 12:55:54	800105016	1		1945-04-17	吉林大学白求恩第一医院	胃肠外科	2015-06-16	-1	0	0	0	1	0	0	0	0	0	0	0	0	0	0	0	0	0	0	0	0	0	0	1	4	35	1	1	1	1					0	0	2	0	1	3		1
2015-09-23 13:05:53	800104780	1		1948-09-10	吉林大学白求恩第一医院	胃肠外科	2015-06-01	-1	0	0	0	1	0	0	0	0	0	0	0	0	0	0	0	0	0	0	0	0	0	0	1	7	40	1	0	0						0	0	0	0	0	0
2016-07-01 17:36:59	400101340	1		1955-12-29	重庆大坪医院	胃结直肠外科	2016-03-12	-1	0	0	0	0	0	0	0	0	0	0	0	0	0	0	0	0	0	0	0	0	0	0	1	7	15	2	0	0						0	0	0	0	0	0
2017-02-04 16:30:28	2400100151	1		1977-08-06	西京医院	胃肠外科	2016-08-04	-1	0	0	0	0	0	0	0	0	0	0	0	0	0	0	0	0	0	0	0	0	0	0	1	4	16	2	0	0						0	0	0	0	0	0
2017-02-23 16:32:18	2400100178	1		1949-07-12	西京医院	胃肠外科	2016-07-19	-1	0	0	0	0	0	0	0	0	0	0	0	0	0	0	0	0	0	0	0	0	0	1	1	7	40	2	0	0						0	0	0	0	1	3
2017-02-03 15:51:02	2400100136	1		1955-05-14	西京医院	胃肠外科	2016-08-06	-1	0	0	0	0	0	0	0	1	1	0	0	0	0	0	0	0	0	0	0	0	0	1	1	1	3	3	0	0						0	0	0	0	0	0
2015-09-28 20:27:02	800104832	1		1948-04-17	吉林大学白求恩第一医院	胃肠外科	2015-05-04		0	0	0	0	0	0	0	0	0	0	0	0	0	0	0	0	0	0	0	0	0	0	1	5	10	3	0	0						0	0	0	0	0	0
2015-11-08 21:48:18	800105044	1		1953-06-23	吉林大学白求恩第一医院	胃肠外科	2015-05-22	-1	0	0	0	0	0	0	0	0	0	0	0	0	0	0	0	0	0	0	0	0	0	0	1	3	40	1	1	6	1					0	0	12	0	0	0
2014-06-03 19:11:18	800101600	1		1945-05-20	吉林大学白求恩第一医院	肿瘤中心	2014-01-07		0	0	0	0	0	0	0	0	0	0	0	0	0	0	0	0	0	0	0	0	0	0	1	7	40	1	1	4	1					0	0	16	0	1	14	1
2015-05-31 00:13:45	800103748	1		1956-03-08	吉林大学白求恩第一医院	胃肠外科	2014-09-24	-1	0	0	0	0	0	0	0	0	0	0	0	0	0	0	0	0	0	0	0	0	0	0	1	7	45	1	1	14	1					0	0	42	0	0	0
2015-08-03 00:46:09	800104038	1		1969-08-06	吉林大学白求恩第一医院	胃肠外科	2015-05-23	-1	0	0	0	0	0	0	0	0	0	0	0	0	0	0	0	0	0	0	0	0	0	0	1	7	25	1	1	14	1					0	0	28	0	0	0
2015-08-07 17:04:15	800104243	1		1958-07-11	吉林大学白求恩第一医院	胃肠外科	2015-06-29		0	0	0	0	0	0	0	0	0	0	0	0	0	0	0	0	0	0	0	0	0	0	1	7	35	1	1	14	1					0	0	14	0	0	0
2015-08-11 23:51:34	800104341	1		1970-08-24	吉林大学白求恩第一医院	胃肠外科	2015-06-18		0	0	0	0	0	0	0	0	0	0	0	0	0	0	0	0	0	0	0	0	0	0	1	7	30	1	0	0						0	0	0	0	0	0
2015-10-29 11:41:38	800104961	1		1957-07-14	吉林大学白求恩第一医院	胃肠外科	2015-06-16	-1	0	0	0	0	0	0	0	1	1	0	0	0	0	0	0	0	0	0	0	0	0	0	1	5	43	1	0	0						0	0	0	0	1	3
2017-03-12 15:14:09	800105750	1		1955-12-06	吉林大学白求恩第一医院	胸外科	2015-10-04		0	0	0	0	0	0	0	0	0	0	0	0	0	0	0	0	0	0	0	0	0	0	1	7	45	1	1	7	1					0	0	50	0	0	0
2017-02-23 15:11:53	2400100174	1		1982-02-26	西京医院	胃肠外科	2016-07-10	-1	0	0	0	0	0	0	0	0	0	0	0	0	0	0	0	0	0	0	0	0	0	1	1	1	20	2	0	0						0	0	0	0	0	0
2016-08-05 17:31:00	400101441	1		1969-05-06	重庆大坪医院	胃结直肠外科	2016-03-21	-1	0	0	0	0	0	0	0	0	0	0	0	0	0	0	0	0	0	0	0	0	0	0	1	4	15	2	0	0						0	0	0	0	0	0
2015-04-24 13:03:44	800103676	1		1947-04-04	吉林大学白求恩第一医院	胃肠外科	2015-01-21	-1	0	0	0	0	0	0	1	0	0	1	0	0	0	0	0	0	0	0	0	0	0	1	1	7	40	1	1	3	1					0	0	3	0	1	7	1
2015-08-06 11:49:49	800104186	1		1951-06-17	吉林大学白求恩第一医院	胃肠外科	2015-07-12		0	0	0	0	0	0	0	0	0	0	0	0	0	0	0	0	0	0	0	0	0	0	1	7	46	1	0	0						0	0	0	0	0	0
2015-08-16 22:28:07	800104458	1		1961-06-15	吉林大学白求恩第一医院	胃肠外科	2015-06-29		0	0	0	0	0	0	0	0	0	0	0	0	0	0	0	0	0	0	0	0	0	0	1	2	10	3	0	0						0	0	0	0	0	0
2017-02-21 11:05:32	800105590	1		1966-05-06	吉林大学白求恩第一医院	胃肠外科	2015-07-09	-1	0	0	0	0	0	0	0	0	0	0	0	0	0	0	0	0	0	0	0	0	1	0	1	6	30	1	1	5	1		1			0	0	25	0	1	7	1	1
2017-02-23 18:04:30	2400100185	1		1952-10-05	西京医院	胃肠外科	2016-07-04	-1	0	0	0	0	0	0	0	1	0	0	0	0	0	0	0	0	0	0	0	0	0	0	1	14	40	2	1	6	1					0	0	18	0	1	7		1
2017-02-04 10:10:23	2400100142	1		1952-09-19	西京医院	胃肠外科	2016-07-27	-1	0	0	0	0	0	0	0	0	0	0	0	0	0	0	0	0	0	0	0	0	0	0	1	1	20	2	0	0						0	0	0	0	1	7	1
2017-02-07 10:21:06	2400100162	1		1953-01-17	西京医院	胃肠外科	2016-02-23	-1	0	0	0	0	0	0	0	0	0	0	0	0	0	0	0	0	0	0	0	0	0	0	1	4	1	2	0	0						0	0	0	0	0	0
2017-03-06 10:24:46	2400100255	2		1966-03-28	西京医院	胃肠外科	2016-07-27	-1	0	0	0	0	0	0	0	0	0	0	0	0	0	0	0	0	0	0	0	0	0	1	1	7	15	3	1	1	1		1			1	0	1	0	1	10	1
2014-05-19 19:44:51	800101432	1		1963-10-04	吉林大学白求恩第一医院	胃肠外科	2014-03-13		0	0	0	0	0	0	0	0	0	0	0	0	0	0	0	0	0	0	0	0	0	0	1	7	30	1	0	0						0	0	0	0	0	0
2015-10-25 22:19:35	800104941	2		1958-12-30	吉林大学白求恩第一医院	胃肠外科	2015-07-02	-1	0	0	0	0	0	0	0	0	0	0	0	0	0	0	0	0	0	0	0	0	0	0	1	2	20	1	0	0						0	0	0	0	0	0
2015-09-14 12:42:55	800104759	1		1948-03-23	吉林大学白求恩第一医院	胃肠外科	2015-07-13	-1	0	0	0	0	0	0	0	0	0	0	0	0	0	0	0	0	0	0	0	0	0	0	1	7	25	1	0	0						0	0	0	0	1	21		1
2016-05-10 09:54:32	1300200694	1		1946-07-03	福建省肿瘤医院	七区 胃肠肿瘤外科	2014-10-27		0	0	0	0	0	0	0	1	0	0	0	0	0	0	0	0	0	0	0	0	0	0	1	2	20	1	0	0						0	0	0	0	0	0
2015-10-16 20:57:43	800104899	1		1950-11-28	吉林大学白求恩第一医院	胃肠外科	2015-07-31	-1	0	0	0	0	0	0	0	0	0	0	0	0	0	0	0	0	1	0	0	0	0	0	1	7	40	1	0	0						0	0	0	0	1	3
2015-11-04 22:18:14	800105006	1		1960-02-16	吉林大学白求恩第一医院	胃肠外科	2015-08-01	-1	0	0	0	0	0	0	1	0	0	0	0	0	0	0	0	0	0	0	0	0	0	0	1	14	30	1	0	0						0	0	0	0	0	0
2016-03-25 23:36:29	800105263	1		1946-05-13	吉林大学白求恩第一医院	胃肠外科	2015-07-24		0	0	0	0	0	0	0	0	0	0	0	0	0	0	0	0	0	0	0	0	0	0	1	7	50	1	0	0						0	0	0	0	0	0
2017-01-24 10:59:05	2400100133	1		1965-02-01	西京医院	胃肠外科	2016-08-16	-1	0	0	0	0	0	0	0	0	0	0	0	0	0	0	0	0	0	0	0	0	0	0	1	10	30	2	1	3	1		1			0	0	2	0	0	0
2017-01-23 15:35:52	2400100127	1		1954-09-20	西京医院	胃肠外科	2016-08-24	-1	0	0	0	0	0	0	0	0	0	0	0	0	0	0	0	0	0	0	0	0	1	0	1	4	40	2	1	5	1					0	0	10	0	0	0
2017-01-22 17:17:23	2400100120	1		1952-04-15	西京医院	胃肠外科	2016-09-03	-1	0	0	0	0	0	0	0	0	0	0	0	0	0	0	0	0	0	0	0	0	1	0	1	2	30	1	1	1	1					0	0	0.1	0	1	7
2016-05-13 09:45:30	2300100278	1		1974-12-16	昆明医科大学第一附属医院	普外一科（胃肠与疝外科）	2015-08-20	-1	0	0	0	0	0	0	0	0	0	0	0	0	0	0	0	0	0	0	0	0	0	0	1	7	20	2	1	7	1					0	0	17.5	0	0	0
2017-01-11 11:15:19	2400100099	1		1961-11-13	西京医院	胃肠外科	2016-09-09	-1	0	0	0	0	0	0	0	0	0	0	0	0	0	0	0	0	0	0	0	0	1	0	1	2	25	2	1	2	1					0	0	6	0	1	7	1
2016-05-16 16:15:54	1900101253	1		1975-12-05	中山大学第一附属医院	胃肠外科	2014-12-01	-1	0	0	0	0	0	0	0	0	0	0	0	0	0	0	0	0	0	0	0	0	0	1	1	5	16	1	1	7				1		0	0	14	0	0	0
2015-04-19 10:20:59	800103614	1		1962-08-16	吉林大学白求恩第一医院	胃肠外科	2015-01-18		0	0	0	0	0	0	0	0	0	0	0	1	0	0	0	0	0	0	0	0	0	1	1	7	30	1	0	0						0	0	0	0	0	0
2017-02-20 23:08:42	800105578	1		1963-08-22	吉林大学白求恩第一医院	胃肠外科	2015-12-10	-1	0	0	0	0	0	0	0	0	0	0	0	0	0	0	0	0	0	0	0	0	1	0	1	7	30	1	1	7	1		1			0	0	14	0	1	3	1	1
2017-02-19 23:17:44	800105553	1		1963-07-18	吉林大学白求恩第一医院	肿瘤中心	2015-10-27		0	0	0	0	0	0	0	0	0	0	0	0	0	0	0	0	0	0	0	0	0	0	1	7	35	1	0	0						0	0	0	0	0	0
2015-01-05 17:33:21	800103028	1		1963-04-23	吉林大学白求恩第一医院	胃肠外科	2014-07-21		0	0	0	0	0	0	0	0	0	0	0	0	0	0	0	0	0	0	0	0	0	0	1	1	20	2	0	0						0	0	0	0	0	0
2016-05-10 16:38:45	1300200863	1		1958-09-15	福建省肿瘤医院	七区 胃肠肿瘤外科	2015-02-25		0	0	0	0	0	0	0	0	0	0	0	0	0	0	0	0	0	0	0	0	0	0	1	10	40	2	0	0						0	0	0	0	0	0
2016-05-16 16:32:17	1900101236	1		1954-12-01	中山大学第一附属医院	胃肠外科	2015-01-12	-1	0	0	0	0	0	0	0	0	0	0	0	0	0	0	0	0	0	0	0	0	0	0	1	6	12	3	0	0						0	0	0	0	0	0
2014-06-15 10:30:04	800101748	1		1958-04-26	吉林大学白求恩第一医院	肿瘤中心	2014-03-14		0	0	0	0	0	0	0	0	0	0	0	0	0	0	0	0	0	0	0	0	0	0	1	13	40	1	1	7	1					0	0	15	0	0	0
2016-05-13 15:30:20	1300200176	1		1965-05-28	福建省肿瘤医院	干部保健特需病房	2014-04-09		0	0	0	0	0	0	0	0	0	0	0	0	0	0	0	0	0	0	0	0	0	0	1	3	30	2	0	0						0	0	0	0	1	14
2015-07-21 12:01:50	800103849	1		1951-02-09	吉林大学白求恩第一医院	胃肠外科	2015-04-01		0	0	0	0	0	0	0	0	0	0	0	0	0	0	0	0	0	0	0	0	0	0	1	14	50	1	1	7	1					0	0	49	0	0	0
2015-07-24 19:46:48	800103918	1		1952-04-05	吉林大学白求恩第一医院	胃肠外科	2015-04-05		0	0	1	0	0	0	1	1	0	0	0	0	0	0	0	0	0	0	0	0	0	0	1	7	40	1	1	14	1					0	0	14	0	1	7	1	1
2017-03-03 09:59:19	2400100240	1		1953-05-06	西京医院	胃肠外科	2016-12-29	-1	0	0	0	0	0	0	0	0	0	0	0	0	0	0	0	0	0	0	0	0	0	1	1	5	25	1	0	0						0	0	0	0	1	7	1
2016-05-16 16:12:47	1900101260	2		1956-12-31	中山大学第一附属医院	胃肠外科	2015-03-02		0	0	0	0	0	0	0	0	0	0	0	0	0	0	0	0	0	0	0	0	0	0	1	10	40	1	0	0						0	0	0	0	0	0
2016-03-27 22:23:01	800105298	1		1957-10-09	吉林大学白求恩第一医院	胃肠外科	2015-05-08		0	0	0	0	0	0	0	1	0	0	0	0	0	0	0	0	0	0	0	0	0	0	1	4	45	1	1	7	1					0	0	14	0	1	7	1
2016-05-16 16:08:02	1900101269	1		1963-01-01	中山大学第一附属医院	胃肠外科	2015-03-09	-1	0	0	0	0	0	0	0	0	0	0	0	0	0	0	0	0	0	0	0	0	0	1	1	4	35	1	0	0						0	0	0	0	0	0
2016-05-11 09:24:51	1300200901	1		1956-11-12	福建省肿瘤医院	干部保健特需病房	2015-04-20		0	0	0	0	0	0	0	0	0	0	0	0	0	0	0	0	0	0	0	0	0	0	1	14	40	1	0	0						0	0	0	0	0	0
2017-01-23 18:12:47	2400100129	1		1955-12-08	西京医院	胃肠外科	2016-08-24	-1	0	0	0	0	0	0	0	0	0	0	0	0	0	0	0	0	0	0	0	0	1	0	1	2	3	3	1	1	1					0	0	3	0	0	0
2015-08-29 22:47:14	800104659	1		1950-10-22	吉林大学白求恩第一医院	胃肠外科	2015-06-15		0	0	0	0	0	0	0	1	1	0	0	0	0	0	0	0	0	0	0	0	0	0	1	2	40	1	1	3	1					0	0	6	0	1	7
2016-01-13 21:18:30	2300100426	1		1977-01-21	昆明医科大学第一附属医院	普外一科（胃肠与疝外科）	2014-11-06	-1	0	0	0	0	0	0	0	0	0	0	0	0	0	0	0	0	0	0	0	0	0	0	1	3	10	1	0	0						0	0	0	0	0	0
2017-02-16 15:39:09	2400100164	1		1956-03-01	西京医院	胃肠外科	2017-02-16	-1	0	0	0	0	0	0	0	0	0	0	0	0	0	0	0	0	0	0	0	0	0	0	1	4	30	2	0	0						0	0	0	0	1	2	1
2017-02-24 11:19:13	2400100189	1		1992-02-28	西京医院	胃肠外科	2016-06-30	-1	0	0	0	0	0	0	0	0	0	0	0	0	0	0	0	0	0	0	0	0	0	0	1	3	2	4	0	0						0	0	0	0	1	3
2016-05-16 15:29:24	1900101314	1		1951-05-29	中山大学第一附属医院	胃肠外科	2015-04-27		0	0	0	0	0	0	0	0	0	0	0	0	0	0	0	0	0	0	0	0	0	0	1	9	20	1	0	0						0	0	0	0	0	0
2017-04-17 16:17:32	400102008	1		1950-01-05	重庆大坪医院	胃结直肠外科	2017-02-16	-1	0	0	0	0	0	0	0	1	0	0	0	0	0	0	0	0	0	0	0	0	0	0	1	7	40	1	1	7	1					0	0	30	0	0	0
2014-04-07 10:14:33	800101125	1		1965-01-09	吉林大学白求恩第一医院	肿瘤中心	2014-03-19		0	0	0	0	0	0	0	0	0	0	0	0	0	0	0	0	0	0	0	0	0	0	1	7	30	1	0	0						0	0	0	0	0	0
2016-05-19 14:05:48	500700220	1		1953-08-08	邢台市人民医院	肿瘤内科	2014-11-24	-1	0	0	0	0	0	0	0	0	0	0	0	0	0	0	0	0	0	0	0	0	0	1	1	7	30	2	0	0						0	0	0	0	1	7
2016-05-13 14:33:08	1900101317	1		1950-11-28	中山大学第一附属医院	胃肠外科	2015-05-31	-1	0	0	0	0	0	0	0	0	0	0	0	0	0	0	0	0	0	0	0	0	0	0	1	7	15	2	0	0						0	0	0	0	0	0
2016-05-13 14:52:26	1300201223	1		1960-01-04	福建省肿瘤医院	七区 胃肠肿瘤外科	2015-07-10		0	0	0	0	0	0	0	0	0	0	0	0	0	0	0	0	0	0	0	0	0	0	1	7	30	1	0	0						0	0	0	0	0	0
2017-09-10 19:16:47	800105982	1		1952-04-19	吉林大学白求恩第一医院	胃肠外科	2015-10-19	-1	0	0	0	0	0	0	0	0	0	0	0	0	0	0	0	0	0	0	0	0	1	0	1	10	50	1	0	0						0	0	0	0	0	0
2016-05-13 10:14:36	1300200696	1		1958-12-23	福建省肿瘤医院	七区 胃肠肿瘤外科	2014-09-09		0	0	0	0	0	0	0	0	0	0	0	0	0	0	0	0	0	0	0	0	0	0	1	2	20	2	0	0						0	0	0	0	0	0
2016-05-11 15:54:37	400200476	1		1948-01-01	重庆市第三人民医院	普外科	2016-04-16	-1	0	0	0	0	0	0	0	0	0	0	0	0	0	0	0	0	0	0	0	0	0	1	1	7	35	2	1	2	1					0	0	5	0	0	0
2014-05-24 18:32:46	800101487	2		1955-10-21	吉林大学白求恩第一医院	胃肠外科	2014-03-03		0	0	0	0	0	0	0	0	0	0	0	0	0	0	0	0	0	0	0	0	0	0	1	3	10	2	0	0						0	0	0	0	0	0
2016-05-12 10:30:22	1300201077	1		1958-04-01	福建省肿瘤医院	干部保健特需病房	2015-10-26		0	0	0	0	0	0	0	0	0	0	0	0	0	0	0	0	0	0	0	0	0	0	1	7	8	2	1	4			1			7	0	0	0	1	7		1
2014-07-12 13:14:34	800102114	1		1962-02-28	吉林大学白求恩第一医院	胃肠外科	2014-03-24		0	0	0	0	0	0	0	0	0	0	0	0	0	0	0	0	0	0	0	0	0	1	1	5	25	1	0	0						0	0	0	0	1	7	1
2014-11-08 20:41:00	800102631	1		1957-04-20	吉林大学白求恩第一医院	肿瘤中心	2014-08-15		0	0	0	0	0	0	0	0	0	0	0	0	0	0	0	0	0	0	0	0	0	0	1	1	10	3	0	0						0	0	0	0	0	0
2016-05-10 16:21:17	1300200842	1		1954-04-05	福建省肿瘤医院	七区 胃肠肿瘤外科	2014-12-16		0	0	0	0	0	0	0	0	0	0	0	0	0	0	0	0	0	0	0	0	0	0	1	1	35	2	1	7	1					0	0	3.5	0	0	0
2016-05-12 11:04:39	1300201098	1		1968-12-13	福建省肿瘤医院	干部保健特需病房	2015-11-03		0	0	0	0	0	0	0	1	0	0	0	0	0	0	0	0	0	0	0	0	0	0	1	4	27	2	1	1			1		1	0	7	0	0	1	7	1	1
2017-03-20 10:02:48	400200549	1		1956-05-20	重庆市第三人民医院	肿瘤血液科	2016-05-31	-1	0	0	0	0	0	0	0	1	1	0	0	0	0	0	0	0	0	0	0	0	0	0	1	7	40	1	0	0						0	0	0	0	0	0
2017-03-23 22:36:58	800105824	1		1950-12-09	吉林大学白求恩第一医院	胃肠外科	2016-01-02		0	0	0	0	0	0	0	1	0	0	0	0	0	0	0	0	0	0	0	0	0	0	1	4	20	3	1	21	1					0	0	14	0	1	7		1
2015-04-17 12:58:12	800103548	2		1955-09-23	吉林大学白求恩第一医院	肿瘤中心	2015-01-17		0	0	0	1	0	0	0	1	0	0	0	0	0	0	0	0	0	0	0	0	0	0	1	7	30	1	0	0						0	0	0	0	1	15		1
2016-05-13 10:49:17	1300201255	1		1950-10-19	福建省肿瘤医院	干部保健特需病房	2016-03-02		0	0	0	0	0	0	0	1	1	0	0	0	0	0	0	0	0	0	0	0	0	0	1	2	4	3	0	0						0	0	0	0	1	7	1
2015-04-19 19:45:47	800103630	1		1957-08-25	吉林大学白求恩第一医院	肿瘤中心	2015-03-10		0	0	0	0	0	0	0	0	0	0	0	0	0	0	0	0	0	0	0	0	0	0	1	7	33	1	1	7	1					0	0	21	0	1	7	1
2019-03-08 10:00:59	800108016	1		1972-01-27	吉林大学白求恩第一医院	肿瘤中心	2018-04-23	-1	0	0	0	0	0	0	0	0	0	0	0	0	0	0	0	0	0	0	0	0	1	0	1	5	10	1	1	3	1					0	0	15	0	1	7
2018-10-05 13:25:38	2800400260	1		1967-09-09	广西医科大学一附院	胃肠腺体外科	2018-05-11	-1	0	0	0	0	0	0	0	0	0	0	0	0	0	0	0	0	0	0	0	0	0	0	1	14	23	3	0	0						0	0	0	0	0	0
2018-04-18 16:09:12	2400100294	1		1963-08-09	西京医院	胃肠外科	2018-04-17	-1	0	0	0	0	0	0	0	0	0	0	0	0	0	0	0	0	0	0	0	0	1	0	1	5	10	1	1	7	1					0	0	5	0	1	14	1
2018-04-19 16:08:43	2400100295	1		1964-02-16	西京医院	胃肠外科	2018-04-18	-1	0	0	0	0	0	0	0	0	0	0	0	0	0	0	0	0	0	0	0	0	1	0	1	7	30	1	0	0						0	0	0	0	1	7
2014-03-18 10:23:18	800101059	1		1967-06-20	吉林大学白求恩第一医院	肿瘤中心	2014-01-09		0	0	0	0	0	0	0	0	0	0	0	0	0	0	0	0	0	0	0	0	0	0	1	7	20	1	1	2	1		1			3	0	2	0	0	0
2017-11-17 14:27:25	800106158	1		1956-08-17	吉林大学白求恩第一医院	肿瘤中心	2017-07-06	-1	0	0	0	0	0	0	0	0	0	0	0	0	0	0	0	0	0	0	0	0	1	1	1	9	30	1	1	7	1		1			2	0	30	0	1	4	1
2018-10-23 21:15:00	800106623	1		1960-10-22	吉林大学白求恩第一医院	肿瘤中心	2017-07-10	-1	0	0	0	0	0	0	0	0	0	0	0	0	0	0	0	0	0	0	0	0	1	0	1	16	20	1	0	0						0	0	0	0	1	1	1
2014-03-19 10:18:39	800101074	1		1956-05-09	吉林大学白求恩第一医院	肿瘤中心	2014-02-11		0	0	0	0	0	0	0	0	0	0	0	0	0	0	0	0	0	0	0	0	0	0	1	7	40	1	1	3	1					0	0	20	0	1	5
2016-05-13 15:06:40	1300200008	1		1970-12-05	福建省肿瘤医院	干部保健特需病房	2014-01-20		0	0	0	0	0	0	0	0	0	0	0	0	0	0	0	0	0	0	0	0	0	1	1	15	5	2	0	0						0	0	0	0	1	2		1
2019-10-27 20:34:13	800108716	1		1960-02-10	吉林大学白求恩第一医院	肿瘤中心	2019-05-31	-1	0	0	0	0	0	0	0	0	0	0	0	0	0	0	0	0	0	0	0	0	1	0	1	4	40	1	0	0						0	0	0	0	0	0
2017-02-24 10:55:55	1300201499	1		1960-07-12	福建省肿瘤医院	干部保健特需病房	2017-02-20		0	0	0	0	0	0	0	0	0	0	0	0	0	0	0	0	0	0	0	0	1	0	1	7	35	2	0	0						0	0	0	0	1	7		1
2018-12-26 09:24:55	1300202660	1		1962-06-16	福建省肿瘤医院	干部保健特需病房	2018-12-20	-1	0	0	0	0	0	0	0	0	0	0	0	0	0	0	0	0	0	0	0	0	1	0	1	7	30	2	1	5			1			2	0	0	0	0	0
2019-04-16 13:48:30	800108268	1		1955-09-02	吉林大学白求恩第一医院	肿瘤中心	2018-06-20	-1	0	0	0	0	0	0	0	0	0	0	0	0	0	0	0	0	1	0	0	0	0	0	1	3	16	1	0	0						0	0	0	0	0	0
2018-12-30 17:39:28	800107630	1		1960-02-16	吉林大学白求恩第一医院	肿瘤中心	2018-12-05	-1	0	0	0	0	0	0	0	0	0	0	0	0	0	0	0	0	0	0	0	0	1	0	1	7	30	2	0	0						0	0	0	0	0	0
2019-12-20 21:32:07	800109724	1		1960-11-02	吉林大学白求恩第一医院	肿瘤中心	2018-08-20	-1	0	0	0	0	0	0	0	0	0	0	0	0	0	0	0	0	0	0	0	0	1	0	1	7	30	2	1	21	1					0	0	35	0	0	0
2015-11-25 12:25:47	800105098	2		1968-05-03	吉林大学白求恩第一医院	胃肠外科	2015-07-18	-1	0	0	0	0	0	0	0	0	0	0	0	0	0	0	0	0	0	0	0	0	0	0	1	7	20	1	1	3	1					0	0	10	0	1	7		1
2020-01-08 20:01:14	800110036	1		1956-12-25	吉林大学白求恩第一医院	肿瘤中心	2018-12-17	-1	0	0	0	0	0	0	0	0	0	0	0	0	0	0	0	0	0	0	0	0	1	1	1	5	30	2	0	0						0	0	0	0	0	0
2014-02-26 13:34:22	800100411	1		1949-08-14	吉林大学白求恩第一医院	肿瘤中心	2014-01-22		0	0	0	0	0	0	0	0	0	0	0	0	0	0	0	0	0	0	0	0	0	0	1	10	25	1	1	1	1					0	0	2	0	0	0
2014-06-15 11:12:03	800101753	1		1944-01-06	吉林大学白求恩第一医院	肿瘤中心	2014-05-04		0	0	0	0	0	0	0	0	0	0	0	0	0	0	0	0	0	0	0	0	0	0	1	10	40	1	0	0						0	0	0	0	0	0
2019-04-03 08:33:30	800108208	1		1967-11-10	吉林大学白求恩第一医院	肿瘤中心	2019-01-07	-1	0	0	0	0	0	0	0	0	0	0	0	0	0	0	0	0	0	0	0	0	1	0	1	10	35	2	0	0						0	0	0	0	1	7
2017-05-25 15:50:59	1300201569	1		1948-07-28	福建省肿瘤医院	干部保健特需病房	2017-04-28		0	0	0	0	0	0	1	1	0	0	0	0	0	0	0	0	0	0	0	0	0	0	1	14	30	3	1	7	1					0	0	14	0	1	7	1	1
2018-04-19 13:21:46	100900233	1		1952-08-08	首都医科大学附属北京世纪坛医院	胃肠外科	2018-04-17	-1	0	0	0	0	0	0	0	0	0	0	0	0	0	0	0	0	0	0	0	0	1	0	1	2	10	2	0	0						0	0	0	0	0	0
2017-07-13 08:35:38	1300201610	1		1973-08-03	福建省肿瘤医院	干部保健特需病房	2017-07-10	-1	0	0	0	0	0	0	0	0	0	0	0	0	0	0	0	0	0	0	0	0	1	0	1	7	30	2	1	7	1		1			7	0	14	0	1	7		1
2018-07-02 17:25:26	400102774	1		1956-12-08	重庆大坪医院	胃结直肠外科	2017-12-18	-1	0	0	0	0	0	0	0	1	0	0	0	0	0	0	0	0	0	0	0	0	0	0	1	7	20	2	0	0						0	0	0	0	0	0
2019-10-14 15:29:10	800108573	1		1988-04-28	吉林大学白求恩第一医院	肿瘤中心	2019-05-23	-1	0	1	0	0	0	0	0	0	0	0	0	0	0	0	0	0	0	0	0	0	0	0	1	7	11	1	0	0						0	0	0	0	0	0
2019-05-28 16:17:07	800108332	1		1962-11-02	吉林大学白求恩第一医院	肿瘤中心	2019-03-18	-1	0	0	0	0	0	0	0	0	0	1	0	0	0	0	0	0	0	0	0	0	0	1	1	4	35	1	0	0						0	0	0	0	1	7
2021-05-04 20:56:39	800110780	1		1985-03-15	吉林大学白求恩第一医院	肿瘤中心	2020-07-27	-1	0	0	0	0	0	0	0	0	0	0	0	0	0	0	0	0	0	0	0	0	1	0	1	7	40	2	1	7	1					0	0	14	40	0	0
2017-10-10 11:18:36	1300201773	1		1952-11-10	福建省肿瘤医院	七区 胃肠肿瘤外科	2017-09-25	-1	0	0	0	0	0	0	0	0	0	0	0	0	0	0	0	0	0	0	0	0	1	0	1	7	40	2	0	0						0	0	0	0	0	0
2017-12-06 10:37:32	1300201931	1		1948-09-07	福建省肿瘤医院	干部保健特需病房	2017-11-27	-1	0	0	0	0	0	0	0	0	0	0	0	0	0	0	0	0	0	0	0	0	1	0	1	7	30	2	0	0						0	0	0	0	0	0
2017-12-22 10:17:50	1300201964	1		1953-01-07	福建省肿瘤医院	干部保健特需病房	2017-12-18	-1	0	0	0	0	0	0	0	0	0	0	0	0	0	0	0	0	0	0	0	0	1	0	1	7	40	2	1	14					1	0	14	0	0	1	7	1
2015-11-06 16:43:09	200100277	1		1958-06-09	天津医科大学肿瘤医院	疼痛治疗科	2014-08-05		0	0	0	0	0	0	0	0	0	0	0	0	0	0	0	0	0	0	0	0	0	1	1	3	3	2	1	7	1					0	0	40	0	1	7
2018-02-01 11:33:45	1300202119	1		1950-04-15	福建省肿瘤医院	干部保健特需病房	2018-01-22	-1	0	0	0	0	0	0	0	0	0	0	0	0	0	0	0	0	0	0	0	0	1	0	1	5	40	2	0	0						0	0	0	0	1	7	1
2019-12-16 14:22:10	800109598	1		1955-03-27	吉林大学白求恩第一医院	肿瘤中心	2019-11-19	-1	0	0	0	0	0	0	0	0	0	0	0	0	0	0	0	0	0	0	0	0	1	0	1	3	20	2	1	7			1			20	0	0	0	0	0
2018-04-17 16:23:27	1300202281	1		1947-01-28	福建省肿瘤医院	干部保健特需病房	2018-03-27	-1	0	0	0	0	0	0	0	0	0	0	0	0	0	0	0	0	0	0	0	0	1	0	1	13	20	3	0	0						0	0	0	0	0	0
2015-12-19 21:20:15	800105118	1		1960-05-04	吉林大学白求恩第一医院	肿瘤中心	2015-08-10		0	0	0	0	0	0	0	1	0	0	0	0	0	0	0	0	0	0	0	0	0	0	1	7	20	1	1	7	1					0	0	14	0	0	0
2018-03-14 15:56:40	1300202204	1		1966-08-14	福建省肿瘤医院	干部保健特需病房	2018-02-27	-1	0	1	0	0	0	0	0	0	0	0	0	0	0	0	0	0	0	0	0	0	0	0	1	10	20	1	0	0						0	0	0	0	1	7	1	1
2017-05-25 16:22:20	1300201571	1		1971-05-20	福建省肿瘤医院	干部保健特需病房	2017-04-24		0	0	0	0	0	0	0	0	0	0	0	0	0	0	0	0	0	0	0	0	1	0	1	7	25	2	1	7	1					0	0	14	0	0	0
2015-08-16 17:57:57	800104152	1		1962-05-06	吉林大学白求恩第一医院	肿瘤中心	2015-06-11		0	0	0	0	0	0	0	0	0	0	0	0	0	0	0	0	0	0	0	0	0	0	1	3	35	1	0	0						0	0	0	0	0	0
2018-08-10 16:58:25	100900381	1		1950-02-02	首都医科大学附属北京世纪坛医院	胃肠外科	2018-05-10	-1	0	0	0	0	0	0	0	0	0	0	0	0	0	0	0	0	0	0	0	0	1	0	1	14	50	2	0	0						0	0	0	0	1	7	1
2019-05-31 15:32:48	800108359	1		1956-05-24	吉林大学白求恩第一医院	肿瘤中心	2019-01-21	-1	0	0	0	0	0	0	0	0	0	0	0	0	0	0	0	0	0	0	0	0	1	0	1	14	35	1	0	0						0	0	0	0	0	0
2019-06-18 21:59:53	800108428	1		1965-07-12	吉林大学白求恩第一医院	肿瘤中心	2019-01-04	-1	0	0	0	0	0	0	0	0	0	1	0	0	0	0	0	0	0	0	0	0	0	0	1	10	30	2	1	4	1		1			0	0	10	0	0	0
2014-08-01 16:24:58	1900101030	1		1954-07-05	中山大学第一附属医院	胃肠外科	2014-07-25		0	0	0	0	0	0	0	0	0	0	0	0	0	0	0	0	0	0	0	0	0	0	1	7	30	1	0	0						0	0	0	0	1	7
2018-12-20 17:32:49	2300102604	1		1949-08-14	昆明医科大学第一附属医院	普外一科（胃肠与疝外科）	2018-11-21	-1	0	0	0	0	0	0	0	0	1	0	0	0	0	0	0	0	0	0	0	0	0	0	1	7	15	3	1	14				1		0	0	20	0	0	0
2019-11-16 15:42:53	800109043	1		1975-09-08	吉林大学白求恩第一医院	肿瘤中心	2019-02-27	-1	0	0	0	0	0	0	0	0	0	0	0	0	0	0	0	0	0	0	0	0	1	1	1	1	10	1	0	0						0	0	0	0	0	0
2019-12-24 20:35:46	800109839	1		1966-10-17	吉林大学白求恩第一医院	肿瘤中心	2019-11-24	-1	0	0	0	0	0	0	0	0	0	0	0	0	0	0	0	0	0	0	0	0	1	0	1	1	20	2	0	0						0	0	0	0	1	3		1
2017-06-29 09:14:59	1300201599	1		1948-05-11	福建省肿瘤医院	干部保健特需病房	2017-06-12		0	1	0	0	0	0	0	0	0	0	0	0	0	0	0	0	0	0	0	0	0	0	1	7	8	3	0	0						0	0	0	0	0	0
2019-02-11 17:14:20	2300102765	1		1961-08-13	昆明医科大学第一附属医院	普外一科（胃肠与疝外科）	2019-01-12	-1	0	0	0	0	0	0	0	0	0	0	0	0	0	0	0	0	0	0	0	0	1	0	1	4	30	1	0	0						0	0	0	0	0	0
2019-05-28 17:42:49	800108335	1		1957-08-12	吉林大学白求恩第一医院	肿瘤中心	2019-05-28	-1	0	0	0	0	0	0	1	0	0	0	0	0	0	0	0	0	0	0	0	0	1	0	1	7	40	2	1	2	1					0	0	4	0	1	7
2019-05-20 15:53:25	800108293	1		1967-12-13	吉林大学白求恩第一医院	肿瘤中心	2019-03-25	-1	0	0	0	0	0	0	0	0	0	0	0	0	0	0	0	0	0	0	0	0	1	0	1	10	30	1	1	14	1					0	0	42	0	0	0
2019-05-27 21:41:36	800108324	1		1952-07-11	吉林大学白求恩第一医院	肿瘤中心	2019-03-25	-1	0	0	0	0	0	0	0	0	0	0	0	0	0	0	0	0	0	0	0	0	1	0	1	2	10	3	1	7	1					0	0	14	0	0	0
2016-05-16 15:08:46	1900101114	1		1949-08-08	中山大学第一附属医院	胃肠外科	2014-09-12		0	0	0	0	0	0	0	1	0	0	0	0	0	0	0	0	0	0	0	0	0	0	1	2	10	1	0	0						0	0	0	0	0	0
2018-11-27 13:46:43	100900443	1		1966-12-25	首都医科大学附属北京世纪坛医院	胃肠外科	2018-11-22	-1	0	0	0	0	0	0	0	0	0	0	0	0	0	0	0	0	0	0	0	0	1	0	1	5	15	4	0	0						0	0	0	0	0	0
2019-01-02 15:07:58	2300102667	1		1968-08-15	昆明医科大学第一附属医院	普外一科（胃肠与疝外科）	2018-12-13	-1	0	0	0	0	0	0	0	0	0	0	0	0	0	0	0	0	0	0	0	0	1	0	1	14	35	2	0	0						0	0	0	0	0	0
2019-12-16 20:26:21	800109631	1		1957-08-02	吉林大学白求恩第一医院	肿瘤中心	2019-10-20	-1	0	0	0	0	0	0	0	1	0	0	0	0	0	0	0	0	0	0	0	0	0	0	1	5	20	3	1	21	1					0	0	42	0	1	7
2015-08-20 23:01:12	800104521	1		1978-10-27	吉林大学白求恩第一医院	胃肠外科	2015-06-10		0	0	0	0	0	0	0	0	0	0	0	0	0	0	0	0	0	0	0	0	0	0	1	7	15	1	0	0						0	0	0	0	0	0
2018-09-29 23:45:19	2300102320	1		1977-09-12	昆明医科大学第一附属医院	普外一科（胃肠与疝外科）	2018-09-04	-1	0	0	0	0	0	0	0	0	0	0	0	0	0	0	0	0	0	0	0	0	1	0	1	7	20	1	1	1	1					1	0	0	0	1	14	1	1
2019-11-23 17:36:57	800109346	1		1949-07-18	吉林大学白求恩第一医院	肿瘤中心	2019-05-20	-1	0	0	0	0	0	0	0	0	0	0	0	0	0	0	0	0	0	0	0	0	1	1	1	7	40	3	0	0						0	0	0	0	0	0
2019-12-21 22:14:00	800109742	1		1955-03-29	吉林大学白求恩第一医院	肿瘤中心	2019-07-30	-1	0	0	0	0	0	0	0	0	0	0	0	0	0	0	0	0	0	0	0	0	1	0	1	10	40	1	0	0						0	0	0	0	0	0
2020-09-28 08:47:47	2300104070	1		1967-09-16	昆明医科大学第一附属医院	肿瘤外科	2020-07-08	-1	0	0	0	0	0	0	0	0	0	0	0	0	0	0	0	0	0	0	0	0	1	0	1	4	20	2	0	0						0	0	0	0	0	0
2019-12-29 12:28:55	800109976	1		1952-02-27	吉林大学白求恩第一医院	肿瘤中心	2019-10-31	-1	0	0	0	0	0	0	0	0	0	0	0	0	0	0	0	0	0	0	0	0	1	1	1	2	34	3	1	2	1		1			2	0	4	0	1	5	1
2016-05-16 17:55:28	3200100286	1		1952-12-17	新疆喀什地区第一人民医院	消化腹部肿瘤外一科	2015-04-09		0	0	0	0	0	0	0	0	0	0	0	0	0	0	0	0	0	0	0	0	0	0	1	4	30	4	0	0						0	0	0	0	0	0
2020-11-15 10:53:05	2300104141	1		1952-05-15	昆明医科大学第一附属医院	肿瘤外科	2020-11-03	-1	0	0	0	0	0	0	0	1	0	0	0	0	0	0	0	0	1	0	0	0	0	0	1	7	30	2	1	5	1					0	0	4	0	1	7	1	1
2020-09-28 15:07:23	2300104077	1		1969-09-11	昆明医科大学第一附属医院	普外一科（胃肠与疝外科）	2020-08-22	-1	0	0	0	0	0	0	0	1	0	0	0	0	0	0	0	0	0	0	0	0	0	0	1	7	40	1	0	0						0	0	0	0	1	7	1
2018-07-22 16:59:11	200101312	1		1955-12-06	天津医科大学肿瘤医院	消化肿瘤内科	2018-07-02		0	0	0	0	0	0	0	0	0	0	0	0	0	0	0	0	0	0	0	0	1	0	1	7	20	2	0	0						0	0	0	0	1	7	1
2021-03-19 11:20:16	2300104359	1		1952-07-05	昆明医科大学第一附属医院	普外一科（胃肠与疝外科）	2021-03-08	-1	0	0	0	0	0	0	0	1	0	0	0	0	0	0	0	0	0	0	0	0	0	0	1	1	20	3	1	5	1					0	0	5	1	0	0
2020-11-20 17:48:31	2300104163	1		1957-05-04	昆明医科大学第一附属医院	普外一科（胃肠与疝外科）	2020-11-10	-1	0	0	0	0	0	0	0	0	0	0	0	0	0	0	0	0	0	0	0	0	1	0	1	7	30	3	0	0						0	0	0	0	1	20	1	1
2019-07-02 18:12:13	400103580	1		1951-03-21	重庆大坪医院	胃结直肠外科	2019-04-06	-1	0	0	0	0	0	0	0	0	0	0	0	0	0	0	0	0	0	0	0	0	1	0	1	10	40	1	1	14	1					0	0	70	0	1	7	1
2019-01-09 20:05:36	400103143	1		1949-12-07	重庆大坪医院	心外科	2018-10-22	-1	0	0	0	0	0	0	0	0	0	0	0	0	0	0	0	0	0	0	0	0	1	0	1	7	40	2	1	7	1					0	0	7	0	0	0
2016-05-19 14:10:38	500700231	1		1954-10-06	邢台市人民医院	肿瘤内科	2014-02-07	-1	0	0	0	0	0	0	0	0	0	0	0	0	0	0	0	0	0	0	0	0	0	0	1	4	30	2	0	0						0	0	0	0	0	0
2017-09-26 15:06:33	1300201753	1		1968-01-08	福建省肿瘤医院	干部保健特需病房	2017-08-30		0	0	0	0	0	0	0	0	0	0	0	0	0	0	0	0	0	0	0	0	1	0	1	7	30	2	0	0						0	0	0	0	0	0
2017-03-07 16:05:49	2400100267	1		1957-12-09	西京医院	胃肠外科	2017-02-15	-1	0	0	0	0	0	0	0	0	0	0	0	0	0	0	0	0	0	0	0	0	1	0	1	1	30	3	0	0						0	0	0	0	0	0
2014-02-26 13:08:52	800100395	1		1952-02-12	吉林大学白求恩第一医院	肿瘤中心	2013-11-04		0	0	0	0	0	0	0	0	0	0	0	0	0	0	0	0	0	0	0	0	0	1	1	7	40	1	0	0						0	0	0	0	1	7	1	1
2016-07-19 16:27:00	400101363	1		1962-06-25	重庆大坪医院	胃结直肠外科	2016-03-23		0	0	0	0	0	0	1	1	0	0	0	0	0	0	0	0	0	0	0	0	0	0	1	6	30	1	0	0						0	0	0	0	0	0
2016-08-01 17:16:09	400101427	1		1944-04-11	重庆大坪医院	胃结直肠外科	2016-03-22	-1	0	0	0	0	0	0	0	0	0	0	0	0	0	0	0	0	0	0	0	0	0	0	1	4	40	2	0	0						0	0	0	0	0	0
2016-05-19 14:07:01	500700224	1		1946-06-03	邢台市人民医院	肿瘤内科	2013-12-06	-1	0	0	0	0	0	0	0	0	0	0	0	0	0	0	0	0	0	0	0	0	0	1	1	6	40	2	0	0						0	0	0	0	1	3		1
2016-05-17 17:24:11	1200100884	1		1948-01-08	安徽省肿瘤医院	肿三	2016-05-05	-1	0	0	0	0	0	0	0	0	0	0	0	0	0	0	0	0	0	0	0	0	0	1	1	10	45		0	0						0	0	0	0	1	14	1
2016-05-10 10:35:04	1300200741	1		1952-09-17	福建省肿瘤医院	干部保健特需病房	2015-01-09		0	1	0	0	0	0	0	0	0	0	0	0	0	0	0	0	0	0	0	0	0	0	1	7	20	3	0	0						0	0	0	0	0	0
2016-05-12 21:43:45	2800400035	1		1958-12-06	广西医科大学一附院	胃肠腺体外科	2015-05-28	-1	0	0	0	0	0	0	0	1	0	0	0	0	0	0	0	0	0	0	0	0	0	0	1	5	40	1	0	0						0	0	0	0	0	0
2016-05-05 10:09:19	1300200412	1		1944-09-01	福建省肿瘤医院	三十一区 腹部肿瘤内科	2014-06-10		0	0	0	0	0	0	0	0	0	0	0	0	0	0	0	0	0	0	0	0	0	1	1	10	20	3	0	0						0	0	0	0	0	0
2016-05-13 15:40:40	1300200185	1		1964-02-28	福建省肿瘤医院	干部保健特需病房	2014-04-25		0	0	0	0	0	0	0	0	0	0	0	0	0	0	0	0	0	0	0	0	0	0	1	10	22	3	0	0						0	0	0	0	0	0
2016-05-19 13:57:19	500700207	1		1955-10-01	邢台市人民医院	肿瘤内科	2014-12-18	-1	0	1	0	0	0	0	0	0	0	0	0	0	0	0	0	0	0	0	0	0	0	0	1	1	30	2	0	0						0	0	0	0	0	0
2014-07-05 18:50:38	800102019	1		1960-09-07	吉林大学白求恩第一医院	胃肠外科	2014-05-07	-1	0	0	0	0	0	0	0	0	0	0	0	0	0	0	0	0	0	0	0	0	0	0	1	7	20	1	1	7	1		1			7	0	0	0	1	7
2016-05-19 12:40:29	500700132	1		1954-03-14	邢台市人民医院	肿瘤内科	2013-12-19	-1	0	0	0	0	0	0	0	0	0	0	0	0	0	0	0	0	0	0	0	0	0	0	1	3	30	2	0	0						0	0	0	0	0	0
2016-05-19 13:53:58	500700195	1		1957-10-25	邢台市人民医院	肿瘤内科	2014-01-03	-1	0	0	0	0	0	0	0	0	0	0	0	0	0	0	0	0	0	0	0	0	0	0	1	3	20	2	0	0						0	0	0	0	0	0
2015-09-15 10:54:07	400200074	2		1969-08-17	重庆市第三人民医院	肿瘤血液科	2015-05-21	-1	0	0	0	0	0	0	0	0	0	0	0	0	0	0	0	0	0	0	0	0	0	0	1	5	15	2	1	3			1			11	0	0	0	0	0
2016-05-13 15:12:45	1300200048	1		1957-09-14	福建省肿瘤医院	干部保健特需病房	2014-03-18		0	0	0	0	0	0	0	0	0	0	0	0	0	0	0	0	0	0	0	0	0	1	1	2	15	3	0	0						0	0	0	0	0	0
2016-05-06 15:26:39	1300200538	1		1949-10-01	福建省肿瘤医院	干部保健特需病房	2014-08-11		0	0	0	0	0	0	0	0	0	0	0	0	0	0	0	0	0	0	0	0	0	1	1	2	15	3	1	7					1	0	10	0	0	1	7		1
2015-11-17 11:01:12	400200271	1		1947-09-01	重庆市第三人民医院	肝胆外科	2015-10-08	-1	0	0	0	0	0	0	0	0	0	0	0	0	0	0	0	0	0	0	0	0	0	0	1	7	20	3	0	0						0	0	0	0	0	0
2016-03-28 18:41:10	800105305	1		1958-06-04	吉林大学白求恩第一医院	胃肠外科	2015-08-10	-1	0	0	0	0	0	0	0	0	0	0	0	0	0	0	0	0	0	0	0	0	0	0	1	7	45	1	1	3	1					0	0	6	0	0	0
2016-05-19 13:52:55	500700191	1		1949-08-20	邢台市人民医院	肿瘤内科	2014-07-13	-1	0	0	0	0	0	0	0	0	0	0	0	0	0	0	0	0	0	0	0	0	0	0	1	2	20	2	0	0						0	0	0	0	0	0
2014-12-28 17:09:29	400100375	1		1944-04-12	重庆大坪医院	胃结直肠外科	2014-12-10	-1	0	0	0	0	0	0	0	0	0	0	0	0	0	0	0	0	0	0	0	0	0	0	1	1	30	3	1	2	1					0	0	5	0	1	3	1
2016-05-03 17:19:22	1300200318	1		1959-12-13	福建省肿瘤医院	三十一区 腹部肿瘤内科	2014-05-23		0	0	0	0	0	0	0	0	0	0	0	0	0	0	0	0	0	0	0	0	0	0	1	5	7	1	0	0						0	0	0	0	0	0
2016-05-11 16:15:07	1300201007	1		1965-12-08	福建省肿瘤医院	干部保健特需病房	2015-07-13		0	1	0	0	0	0	0	0	0	0	0	0	0	0	0	0	0	0	0	0	0	0	1	7	20	2	0	0						0	0	0	0	0	0
2014-12-05 10:25:14	2800100719	1		1953-04-10	广西医科大学附属肿瘤医院	胃肠一区	2014-10-13	-1	0	0	0	0	0	0	0	0	0	0	0	0	0	0	0	0	0	0	0	0	0	0	1	2	10	2	1	6				1		0	0	500	0	0	0
2016-05-03 19:51:41	400100982	2		1973-09-02	重庆大坪医院	胃结直肠外科	2015-11-03	-1	0	0	0	0	0	0	0	0	0	0	0	0	0	0	0	0	0	0	0	0	0	0	1	7	20	1	0	0						0	0	0	0	0	0
2015-02-03 14:43:51	800103168	1		1955-03-01	吉林大学白求恩第一医院	胃肠外科	2014-11-10		0	0	0	0	0	0	0	0	1	1	0	0	0	0	0	0	0	0	0	0	0	0	1	1	30	1	0	0						0	0	0	0	1	7	1
2015-04-09 15:58:58	800103371	1		1955-02-02	吉林大学白求恩第一医院	胃肠外科	2014-07-28	-1	0	0	0	0	0	0	0	0	0	0	0	0	0	0	0	0	0	0	0	0	0	0	1	7	40	1	0	0						0	0	0	0	0	0
2017-10-23 15:46:34	2400100291	1		1958-03-27	西京医院	胃肠外科	2017-03-06	-1	0	0	0	0	0	0	0	0	0	1	0	0	0	0	1	0	0	0	0	0	0	1	1	15	30	2	0	0						0	0	0	0	1	14	1
2016-05-13 15:09:29	1300200027	1		1964-08-13	福建省肿瘤医院	干部保健特需病房	2014-03-11		0	0	0	0	0	0	0	0	0	0	0	0	0	0	0	0	0	0	0	0	0	0	1	7	25	2	0	0						0	0	0	0	1	7		1
2015-09-28 19:39:24	800104826	2		1948-12-30	吉林大学白求恩第一医院	胃肠外科	2015-07-23	-1	0	0	0	0	0	0	0	0	0	0	0	0	0	0	0	0	0	0	0	0	0	0	1	7	40	1	1	7	1					0	0	14	0	0	0
2016-01-11 16:18:43	400101064	1		1965-10-09	重庆大坪医院	胃结直肠外科	2015-11-09	-1	0	0	0	0	0	0	0	0	0	0	0	0	0	0	0	0	0	0	0	0	0	0	1	7	30	1	0	0						0	0	0	0	1	7	1
2015-04-16 23:05:16	800103541	1		1953-01-14	吉林大学白求恩第一医院	胃肠外科	2015-01-28		0	0	0	0	0	0	0	1	0	0	0	0	0	0	0	0	0	0	0	0	0	0	1	2	20	1	1	7	1					0	0	21	0	0	0
2016-05-16 14:51:48	1900101352	1		1953-02-04	中山大学第一附属医院	胃肠外科	2015-05-28		0	0	0	0	0	0	0	0	0	0	0	0	0	0	0	0	0	0	0	0	0	0	1	7	25	3	0	0						0	0	0	0	1	70
2015-01-16 15:19:11	500700109	1		1966-07-04	邢台市人民医院	肿瘤外科	2014-11-24	-1	0	0	0	0	0	0	0	0	0	0	0	0	0	0	0	0	0	0	0	0	0	1	1	8	20		0	0						0	0	0	0	0	0
2015-04-17 16:18:26	800103570	1		1954-04-22	吉林大学白求恩第一医院	肿瘤中心	2015-01-20		0	0	0	0	0	0	0	0	0	0	0	0	0	0	0	0	0	0	0	0	0	1	1	7	40	1	1	14	1					0	0	30	0	0	0
2015-10-15 08:56:21	400200222	1		1948-07-13	重庆市第三人民医院	肝胆外科	2015-09-06	-1	0	0	0	0	0	0	1	0	1	0	0	0	0	0	0	0	0	0	0	0	0	0	1	7	30	3	0	0						0	0	0	0	1	7	1
2014-02-26 11:11:11	800100360	1		1953-11-11	吉林大学白求恩第一医院	肿瘤中心	2013-12-22		0	0	0	0	0	0	0	0	0	0	0	0	0	0	0	0	0	0	0	0	0	1	1	3	40	1	1	14	1					0	0	28	0	0	0
2019-01-01 19:19:46	800107801	1		1968-08-06	吉林大学白求恩第一医院	肿瘤中心	2018-02-22	-1	0	0	0	0	0	0	0	0	0	0	0	0	0	0	0	0	0	0	0	0	1	1	1	7	30	3	0	0						0	0	0	0	0	0
2014-02-26 11:03:33	800100356	1		1953-07-20	吉林大学白求恩第一医院	肿瘤中心	2013-12-08		0	0	0	0	1	0	0	0	0	0	0	0	0	0	0	0	0	0	0	0	0	0	1	4	35	1	0	0						0	0	0	0	1	2		1
2016-05-11 10:09:29	1300200938	1		1952-09-14	福建省肿瘤医院	干部保健特需病房	2015-06-29		0	0	0	0	0	0	0	0	0	0	0	0	0	0	0	0	0	0	0	0	0	0	1	7	15	3	1	7	1					0	0	21	0	1	7	1
2016-05-13 10:12:10	1300201071	1		1951-06-26	福建省肿瘤医院	干部保健特需病房	2015-08-13		0	0	0	0	0	0	0	0	0	0	0	0	0	0	0	0	0	0	0	0	0	0	1	14	12	3	0	0						0	0	0	0	1	1	1
2016-11-28 17:52:17	400101705	1		1963-08-10	重庆大坪医院	消化科	2015-01-12	-1	0	0	0	0	0	0	1	0	0	0	0	0	0	0	0	0	0	0	0	0	0	1	1	10	6	2	1	7			1			15	0	0	0	1	7
2014-09-09 17:43:51	800102568	1		1953-10-07	吉林大学白求恩第一医院	胃肠外科	2014-06-12		0	0	0	0	0	0	0	0	0	0	0	0	0	0	0	0	0	0	0	0	0	0	1	1	40	1	1	1	1					0	0	3	0	0	0
2015-09-06 12:26:18	800104693	1		1962-02-25	吉林大学白求恩第一医院	胃肠外科	2015-03-22		0	0	0	0	0	0	0	0	0	0	0	0	0	0	0	0	0	0	0	0	0	0	1	3	30	1	1	2	1		1			2	0	10	0	0	0
2016-05-06 11:37:49	2800300150	1		1971-10-12	广西壮族自治区人民医院	放疗病区	2015-04-17	-1	0	0	0	0	0	0	0	0	0	0	0	0	0	0	0	0	0	0	0	0	0	1	1	7	20	2	0	0						0	0	0	0	1	7		1
2016-05-11 10:03:30	1300200935	1		1962-11-21	福建省肿瘤医院	干部保健特需病房	2015-06-08		0	0	0	0	0	0	0	0	0	0	0	0	0	0	0	0	0	0	0	0	0	0	1	21	5	3	0	0						0	0	0	0	0	0
2016-05-13 15:28:16	1300200157	1		1950-02-20	福建省肿瘤医院	三十一区 腹部肿瘤内科	2014-04-03		0	0	0	0	0	0	0	0	0	0	0	0	0	0	0	0	0	0	0	0	0	0	1	21	20	2	0	0						0	0	0	0	1	14	1
2015-10-15 17:01:20	400200202	1		1950-08-15	重庆市第三人民医院	普外科	2015-09-10	-1	0	0	0	1	0	0	1	0	0	0	0	0	0	0	0	0	0	0	0	0	0	0	1	5	50	2	0	0						0	0	0	0	1	7	1
2016-05-05 10:01:39	1300200402	1		1963-06-27	福建省肿瘤医院	干部保健特需病房	2014-06-20		0	0	0	0	0	0	0	0	0	0	0	0	0	0	0	0	0	0	0	0	0	0	1	7	30	2	0	0						0	0	0	0	0	0
2016-05-13 13:41:04	1900101353	1		1947-08-12	中山大学第一附属医院	胃肠外科	2015-05-20		0	0	0	0	0	0	0	0	0	0	0	0	0	0	0	0	0	0	0	0	0	0	1	7	8	2	0	0						0	0	0	0	0	0
2019-02-15 09:24:17	800107969	1		1956-03-05	吉林大学白求恩第一医院	肿瘤中心	2018-05-09	-1	0	0	0	0	0	0	0	0	0	0	0	0	0	0	0	0	0	0	0	0	1	1	1	7	40	1	0	0						0	0	0	0	0	0
2014-08-22 21:59:18	800102442	2		1959-04-17	吉林大学白求恩第一医院	胃肠外科	2014-06-04		0	0	0	0	0	0	0	0	0	0	0	0	0	0	0	0	0	0	0	0	0	0	1	1	5	2	0	0						0	0	0	0	0	0
2014-09-10 20:29:36	400100232	1		1961-02-02	重庆大坪医院	肿瘤科	2014-08-07	-1	0	0	0	0	0	0	0	0	0	0	0	0	0	0	0	0	0	0	0	0	0	0	1	1	25	1	0	0						0	0	0	0	0	0
2015-07-27 11:47:50	800103947	1		1971-05-23	吉林大学白求恩第一医院	肿瘤中心	2015-01-22		0	0	0	0	0	0	0	1	0	0	0	0	0	0	0	0	0	0	0	0	0	1	1	7	30	1	0	0						0	0	0	0	1	7
2017-12-29 12:58:08	100900159	2	1	1959-06-16	首都医科大学附属北京世纪坛医院	结直肠肿瘤外科	2017-12-18	-1	0	0	0	0	0	0	0	0	0	0	0	0	0	0	0	0	0	0	0	0	1	0	1	4	45	2	0	0						0	0	0	0	1	3	1
2019-01-01 21:02:37	800107826	1		1953-07-09	吉林大学白求恩第一医院	肿瘤中心	2018-04-03	-1	0	0	0	0	0	0	0	0	0	0	0	0	0	0	0	0	0	0	0	0	1	0	1	7	35	3	0	0						0	0	0	0	1	7
2019-06-29 15:31:08	800108452	1		1965-11-23	吉林大学白求恩第一医院	肿瘤中心	2019-04-15	-1	0	0	0	0	0	0	0	0	0	0	0	0	0	0	0	0	0	0	0	0	1	0	1	8	20	3	0	0						0	0	0	0	0	0
2015-01-14 11:44:18	800103112	2		1950-05-24	吉林大学白求恩第一医院	胃肠外科	2014-09-05	-1	0	0	0	0	0	0	0	0	0	0	0	0	0	0	0	0	0	0	0	0	0	0	1	5	40	1	0	0						0	0	0	0	0	0
2014-07-26 11:38:18	800102238	1		1953-05-01	吉林大学白求恩第一医院	胃肠外科	2014-03-25		0	0	0	0	0	0	0	0	0	0	0	0	0	0	0	0	0	0	0	0	0	0	1	7	10	3	1	7	1					0	0	14	0	0	0
2014-11-26 17:41:24	800102750	1		1954-10-03	吉林大学白求恩第一医院	胃肠外科	2014-08-12		0	0	0	0	0	0	0	0	0	0	0	0	0	0	0	0	0	0	0	0	0	0	1	3	40	1	0	0						0	0	0	0	0	0
2018-04-18 15:55:19	2400100293	1		1958-09-13	西京医院	胃肠外科	2018-04-17	-1	0	0	0	0	0	0	1	0	0	0	0	0	0	0	0	0	0	0	0	0	0	1	1	2	30	3	0	0						0	0	0	0	0	0
2014-02-26 15:30:45	800100451	1		1955-09-09	吉林大学白求恩第一医院	肿瘤中心	2013-08-26		0	0	0	0	0	0	0	0	0	0	0	0	0	0	0	0	0	0	0	0	0	0	1	1	30	1	0	0						0	0	0	0	0	0
2019-11-17 10:56:53	800109092	1		1958-01-26	吉林大学白求恩第一医院	肿瘤中心	2019-06-21	-1	0	0	0	0	0	0	0	0	0	0	0	0	0	0	0	0	0	0	0	0	1	0	1	7	30	1	0	0						0	0	0	0	1	6	1
2014-02-26 15:08:14	800100447	1		1955-09-04	吉林大学白求恩第一医院	肿瘤中心	2013-09-08		0	0	0	0	0	0	0	0	0	0	0	0	0	0	0	0	0	0	0	0	0	1	1	7	20	1	0	0						0	0	0	0	0	0
2015-09-25 12:13:47	400200095	1		1954-06-27	重庆市第三人民医院	肿瘤血液科	2015-05-28	-1	0	0	0	0	0	0	0	0	0	0	0	0	0	0	0	0	0	0	0	0	0	0	1	7	15	3	0	0						0	0	0	0	0	0
2019-11-13 15:32:08	800108946	1		1957-04-30	吉林大学白求恩第一医院	肿瘤中心	2019-05-29	-1	0	0	0	0	0	0	0	0	0	0	0	0	0	0	0	0	0	0	0	0	1	0	1	7	40	1	1	3	1					0	0	12	0	0	0
2014-09-01 08:27:59	800102539	1		1970-04-30	吉林大学白求恩第一医院	胃肠外科	2014-05-23		0	0	0	0	0	0	0	0	0	0	0	0	0	0	0	0	0	0	0	0	0	0	1	11	20	1	1	3	1					0	0	12	0	0	0
2016-05-11 16:12:58	1300201005	1		1949-04-27	福建省肿瘤医院	三十一区 腹部肿瘤内科	2015-05-25		0	0	0	0	0	0	0	0	0	0	0	0	0	0	0	0	0	0	0	0	0	0	1	7	30	2	1	5			1			5	0	0	0	1	3	1	1
2017-10-19 18:22:03	400102348	1		1960-09-06	重庆大坪医院	肿瘤科	2017-05-24	-1	0	0	0	0	0	0	1	0	0	0	0	0	0	0	0	0	0	0	0	0	0	1	1	7	30	3	1	7	1					14	0	25	0	0	0
2016-05-12 11:09:29	1300201107	1		1950-02-06	福建省肿瘤医院	干部保健特需病房	2015-08-21		0	0	0	0	0	0	0	0	0	0	0	0	0	0	0	0	0	0	0	0	0	0	1	7	25	2	0	0						0	0	0	0	0	0
2014-11-12 10:18:52	800102682	1		1947-05-12	吉林大学白求恩第一医院	肿瘤中心	2014-08-05		0	0	0	0	0	0	0	0	0	0	0	0	0	0	0	0	0	0	0	0	0	0	1	3	50	1	0	0						0	0	0	0	1	7
2016-05-10 11:16:49	1300200772	1		1957-10-29	福建省肿瘤医院	三十一区 腹部肿瘤内科	2015-01-12		0	0	0	0	0	0	0	0	1	0	0	0	0	0	0	0	0	0	0	0	0	0	1	7	30	2	1	14	1		1	1		28	0	5	0	0	0
2016-05-10 11:19:02	1300200775	1		1946-01-08	福建省肿瘤医院	干部保健特需病房	2014-11-26		0	0	0	0	0	0	0	1	0	0	0	0	0	0	0	0	0	0	0	0	0	0	1	14	40	1	0	0						0	0	0	0	1	7	1
2016-05-16 14:59:54	1900101337	1		1958-03-18	中山大学第一附属医院	胃肠外科	2015-05-19		0	0	0	0	0	0	0	0	0	0	0	0	0	0	0	0	0	0	0	0	0	0	1	20	30	1	0	0						0	0	0	0	1	7	1
2019-10-26 19:03:56	800108691	2	1	1952-10-25	吉林大学白求恩第一医院	肿瘤中心	2019-02-11	-1	0	0	0	0	0	0	0	0	0	0	1	0	0	0	0	0	0	0	0	0	0	1	1	7	10	3	0	0						0	0	0	0	0	0
2015-10-14 11:15:57	400200226	1		1949-06-16	重庆市第三人民医院	肿瘤血液科	2015-09-14	-1	0	0	0	0	0	0	0	1	0	0	0	0	0	0	0	0	0	0	0	0	0	0	1	7	18	2	1	7	1					0	0	35	0	0	0
2016-05-13 15:07:17	1300200013	1		1947-01-22	福建省肿瘤医院	干部保健特需病房	2014-02-14		0	0	0	0	0	0	0	1	0	0	0	0	0	0	0	0	0	0	0	0	0	0	1	14	30	2	0	0						0	0	0	0	1	7	1
2019-12-06 13:35:24	800109494	1		1960-06-27	吉林大学白求恩第一医院	肿瘤中心	2019-08-05	-1	0	0	0	0	0	0	1	1	0	0	0	0	0	0	0	0	0	0	0	0	0	0	1	7	30	2	0	0						0	0	0	0	0	0
2014-07-07 19:32:26	800102050	1		1953-12-05	吉林大学白求恩第一医院	肿瘤中心	2014-04-03		0	0	0	0	0	0	0	1	0	0	0	0	0	0	0	0	0	0	0	0	0	0	1	7	13	3	0	0						0	0	0	0	0	0
2016-05-19 13:47:22	500700177	1		1950-11-27	邢台市人民医院	肿瘤内科	2014-12-10	-1	0	0	0	0	0	0	0	0	0	0	0	0	0	0	0	0	0	0	0	0	0	0	1	7	30	2	0	0						0	0	0	0	0	0
2016-06-27 16:49:21	1300201294	1		1952-06-05	福建省肿瘤医院	干部保健特需病房	2016-04-23		0	0	0	0	0	0	1	0	1	0	0	0	0	0	0	0	0	0	0	0	0	0	1	14	50	3	0	0						0	0	0	0	0	0
2017-03-22 22:19:37	800105807	1		1951-11-19	吉林大学白求恩第一医院	胃肠外科	2015-07-03		0	0	0	0	0	0	0	0	0	0	0	0	0	0	0	0	0	0	0	0	1	0	1	7	30	1	0	0						0	0	0	0	0	0
2019-12-23 16:55:51	800109793	1		1982-10-22	吉林大学白求恩第一医院	肿瘤中心	2019-10-31	-1	0	1	0	0	0	0	0	0	0	0	0	0	0	0	0	0	0	0	0	0	0	0	1	2	10	3	0	0						0	0	0	0	0	0
2014-02-25 16:55:54	800100296	1		1943-05-15	吉林大学白求恩第一医院	肿瘤中心	2013-11-03		0	1	0	0	0	0	0	0	0	0	0	0	0	0	0	0	0	0	0	0	0	0	1	7	30	1	0	0						0	0	0	0	1	10
2014-11-23 15:59:43	800102741	1		1945-01-05	吉林大学白求恩第一医院	胃肠外科	2014-05-15		0	0	0	0	0	0	0	0	0	0	0	0	0	0	0	0	0	0	0	0	0	0	1	3	30	1	0	0						0	0	0	0	0	0
2017-02-04 16:41:24	2400100152	1		1965-04-19	西京医院	胃肠外科	2016-08-03	-1	0	0	0	0	0	0	1	0	0	0	0	0	0	0	0	0	0	0	0	0	0	0	1	3	15	3	0	0						0	0	0	0	0	0
2016-07-21 10:02:35	1300201346	1		1955-09-11	福建省肿瘤医院	干部保健特需病房	2016-06-12		0	0	0	0	0	0	0	0	0	0	0	0	0	0	0	0	0	0	0	0	1	0	1	14	30	3	0	0						0	0	0	0	0	0
2016-05-03 11:19:50	400200098	1		1957-04-14	重庆市第三人民医院	普外科	2015-06-04	-1	0	0	0	0	0	0	1	0	0	0	0	0	0	0	0	0	0	0	0	0	0	1	1	7	30	2	1	5	1		1			30	0	25	0	1	7	1
2015-09-25 11:06:29	400200195	1		1957-04-14	重庆市第三人民医院	普外科	2015-06-04	-1	0	0	0	0	0	0	1	0	0	0	0	0	0	0	0	0	0	0	0	0	0	1	1	7	30	2	1	5	1		1			30	0	25	0	1	7	1
2014-02-26 14:24:28	800100436	1		1953-07-28	吉林大学白求恩第一医院	肿瘤中心	2013-11-04		0	0	0	0	0	0	0	0	0	0	0	0	0	0	0	0	0	0	0	0	0	0	1	7	30	1	1	10	1					0	0	30	0	0	0
2015-05-04 17:02:22	2400100050	1		1953-11-16	西京医院	胃肠外科	2014-10-29	-1	0	0	0	0	0	0	0	0	0	0	0	0	0	0	0	0	0	0	0	0	1	0	1	7	30	2	1	3	1					0	0	5	0	1	7	1	1
2017-12-03 09:31:53	800106209	1		1949-10-18	吉林大学白求恩第一医院	胃肠外科	2015-10-09	-1	0	0	0	0	0	0	0	1	0	0	0	0	0	0	0	0	0	0	0	0	0	0	1	7	40	3	1	7	1					0	0	7	0	0	0
2019-06-29 15:20:44	800108451	1		1971-01-04	吉林大学白求恩第一医院	肿瘤中心	2019-04-22	-1	0	0	0	0	0	0	0	0	0	0	0	0	0	0	0	0	0	0	0	0	1	1	1	10	25	1	1	2			1			14	0	0	0	0	0
2014-11-25 19:13:40	800102747	1		1950-02-16	吉林大学白求恩第一医院	胃肠外科	2014-06-20	-1	0	0	0	0	0	0	0	0	0	0	0	0	0	0	0	0	0	0	0	0	0	1	1	11	47	1	1	14	1					0	0	28	0	1	7	1	1
2014-04-17 15:06:53	800101197	1		1951-01-17	吉林大学白求恩第一医院	胃肠外科	2014-03-05		0	0	0	0	0	0	0	0	0	0	0	0	0	0	0	0	0	0	0	0	0	0	1	7	40	1	1	7	1					0	0	21	0	0	0
2016-12-21 20:27:24	800105410	1		1946-12-24	吉林大学白求恩第一医院	胃肠外科	2015-07-21		0	0	0	0	0	0	0	0	0	0	0	0	0	0	0	0	0	0	0	0	1	0	1	3	50	1	0	0						0	0	0	0	1	7	1
2016-05-12 11:10:05	1300201108	1		1955-03-10	福建省肿瘤医院	干部保健特需病房	2015-08-20		0	0	0	0	0	0	0	0	0	0	0	0	0	0	0	0	0	0	0	0	0	0	1	14	15	2	1	7	1		1			5	0	14	0	1	7	1
2015-09-16 11:07:42	400200143	1		1953-11-24	重庆市第三人民医院	普外科	2015-07-14	-1	0	0	0	0	0	0	0	1	0	0	0	0	0	0	0	0	0	0	0	0	0	0	1	7	50	2	0	0						0	0	0	0	1	7	1
2017-08-11 20:20:39	2200100534	1		1956-12-07	贵州省遵义市医学院附属肿瘤医院（一附院）	胸部肿瘤科	2017-07-31	-1	0	0	0	0	0	0	0	0	0	0	0	0	0	0	0	0	0	0	0	0	1	0	1	7	40	1	1	7	1					0	0	35	0	1	7	1
2016-05-10 09:39:39	1300200675	1		1970-02-10	福建省肿瘤医院	干部保健特需病房	2014-11-17		0	0	0	0	0	0	0	0	0	0	0	0	0	0	0	0	0	0	0	0	0	0	1	14	30	2	1	7	1					0	0	70	0	1	3		1
2016-01-16 00:39:54	800105141	1		1955-03-27	吉林大学白求恩第一医院	胃肠外科	2015-07-17	-1	0	0	0	0	0	0	0	0	0	0	0	0	0	0	0	0	0	0	0	0	0	0	1	7	30	1	1	14	1					0	0	50	0	0	0
2017-01-10 10:28:43	400200539	1		1957-02-09	重庆市第三人民医院	普外科	2016-05-30	-1	0	0	0	0	0	0	0	0	0	0	0	0	0	0	0	0	0	0	0	0	0	0	1	7	30	2	0	0						0	0	0	0	0	0
2016-06-21 16:47:21	1300201269	1		1967-07-20	福建省肿瘤医院	干部保健特需病房	2016-05-25		0	0	0	0	0	0	0	1	0	0	0	0	0	0	0	0	0	0	0	0	0	0	1	3	15	1	1	7			1			14	0	0	0	1	7	1
2019-03-18 09:47:59	2300102834	1		1966-01-01	昆明医科大学第一附属医院	普外一科（胃肠与疝外科）	2018-12-25	-1	0	0	0	0	0	0	0	0	0	0	0	0	0	0	0	0	0	0	0	0	1	0	1	14	40	2	0	0						0	0	0	0	1	14	1	1
2019-12-16 20:06:05	800109626	1		1950-04-25	吉林大学白求恩第一医院	肿瘤中心	2019-10-11	-1	0	0	0	0	0	0	1	1	0	0	0	0	0	0	0	0	0	0	0	0	0	0	1	7	40	2	1	14	1					0	0	14	0	1	14	1
2019-10-23 10:27:41	800108654	1		1963-04-02	吉林大学白求恩第一医院	肿瘤中心	2019-05-29	-1	0	0	0	0	0	0	0	0	0	0	0	0	0	0	0	0	0	0	0	0	1	0	1	7	30	3	0	0						0	0	0	0	0	0
2017-02-24 10:35:05	1300201498	1		1961-12-30	福建省肿瘤医院	干部保健特需病房	2017-02-13		0	0	0	0	0	0	0	0	0	0	0	0	0	0	0	0	0	0	0	0	1	0	1	7	20	2	0	0						0	0	0	0	1	7		1
2016-05-06 15:32:29	1300200547	1		1970-02-20	福建省肿瘤医院	干部保健特需病房	2014-08-06		0	0	0	0	0	0	0	0	0	0	0	0	0	0	0	0	0	0	0	0	0	1	1	7	20	2	0	0						0	0	0	0	1	4
2018-10-03 22:42:01	2800400238	1		1947-08-15	广西医科大学一附院	胃肠腺体外科	2018-02-27	-1	0	0	0	0	0	0	1	1	0	0	0	0	0	0	0	0	0	0	0	0	0	0	1	2	22	2	0	0						0	0	0	0	0	0
2016-01-24 21:28:04	800105150	1		1984-03-13	吉林大学白求恩第一医院	肿瘤中心	2015-07-08		0	0	0	0	0	0	0	0	0	0	0	0	0	0	0	0	0	0	0	0	0	0	1	7	15	1	0	0						0	0	0	0	0	0
2019-11-23 20:38:04	800109364	1		1966-09-28	吉林大学白求恩第一医院	肿瘤中心	2019-05-29	-1	0	1	0	0	0	0	0	0	0	0	0	0	0	0	0	0	0	0	0	0	0	0	1	7	30	2	1	14			1			14	0	0	0	1	7		1
2014-02-26 15:39:34	800100453	1		1967-08-18	吉林大学白求恩第一医院	肿瘤中心	2013-07-10		0	0	0	0	0	0	0	0	0	0	0	0	0	0	0	0	0	0	0	0	0	1	1	1	26	1	1	2	1					0	0	5	0	0	0
2017-03-23 22:56:18	800105828	1		1951-03-10	吉林大学白求恩第一医院	胃肠外科	2016-01-11		0	0	0	0	0	0	1	0	0	0	0	0	0	0	0	0	0	0	1	0	0	0	1	4	40	1	0	0						0	0	0	0	1	7	1
2016-05-13 15:01:37	1300201194	1		1970-01-05	福建省肿瘤医院	干部保健特需病房	2016-02-14		0	0	0	0	0	0	0	0	0	0	0	0	0	0	0	0	0	0	0	0	0	0	1	7	10	2	0	0						0	0	0	0	1	7		1
2018-07-15 19:40:38	100900324	1		1951-09-12	首都医科大学附属北京世纪坛医院	腹膜外科	2018-01-31	-1	0	0	0	0	0	0	0	0	0	0	0	0	0	0	0	0	0	0	0	0	1	0	1	7	30	3	1	7	1					1	0	0	0	0	0
2016-05-13 15:24:29	1300200133	1		1963-04-19	福建省肿瘤医院	三十一区 腹部肿瘤内科	2014-03-31		0	0	0	0	0	0	0	0	0	0	0	0	0	0	0	0	0	0	0	0	0	0	1	7	30	3	0	0						0	0	0	0	0	0
2016-05-10 12:00:07	1300200814	1		1951-12-18	福建省肿瘤医院	干部保健特需病房	2015-02-08		0	0	0	0	0	0	1	1	0	0	0	0	0	0	0	0	0	0	0	0	0	0	1	10	20	3	0	0						0	0	0	0	1	7	1	1
2015-08-16 21:52:53	800104457	1		1955-11-28	吉林大学白求恩第一医院	胃肠外科	2015-06-25		0	0	0	0	0	0	0	0	0	0	0	0	0	0	1	0	0	0	0	0	0	1	1	7	40	1	1	7	1					0	0	14	0	0	0
2016-05-10 11:46:17	1300200798	1		1959-02-02	福建省肿瘤医院	三十一区 腹部肿瘤内科	2015-02-27		0	0	0	0	0	0	0	0	0	0	0	0	0	0	0	0	0	0	0	0	0	0	1	7	20	3	1	7			1		1	8	3	0	0	0	0
2017-11-24 16:11:47	1300201898	1		1952-10-22	福建省肿瘤医院	干部保健特需病房	2017-11-21		0	0	0	0	0	0	0	0	0	0	0	0	0	0	0	0	0	0	0	0	1	0	1	3	30	2	0	0						0	0	0	0	1	5	1
2016-05-10 16:04:49	1300200819	1		1970-02-26	福建省肿瘤医院	干部保健特需病房	2015-02-27		0	0	0	0	0	0	0	0	0	0	0	0	0	0	0	0	0	0	0	0	0	0	1	4	23	2	0	0						0	0	0	0	1	7		1
2017-03-27 13:20:25	800105881	1		1960-09-19	吉林大学白求恩第一医院	胃肠外科	2015-08-12		0	0	0	0	0	0	0	0	0	0	0	0	0	0	0	0	0	0	0	0	1	0	1	10	40	2	1	1	1					0	0	20	0	1	10	1	1
2016-05-13 09:06:22	1300201242	1		1957-08-24	福建省肿瘤医院	七区 胃肠肿瘤外科	2015-10-09		0	0	0	0	0	0	0	0	0	0	0	0	0	0	0	0	0	0	0	0	0	0	1	7	30	1	1	7				1		0	0	35	0	0	0
2015-10-19 18:38:16	1901300152	1		1970-12-02	佛山市第一人民医院	肿瘤内科	2013-08-05		0	0	0	0	0	0	0	0	0	0	0	0	0	0	0	0	0	0	0	0	0	0	1	7	20	1	0	0						0	0	0	0	0	0
2016-03-22 19:26:26	400100977	1		1945-08-13	重庆大坪医院	胃结直肠外科	2015-10-07		0	0	0	0	0	0	0	1	0	0	0	0	0	0	0	0	1	0	0	0	0	0	1	7	40	1	1	7	1					0	0	35	0	0	0
2016-05-12 11:42:52	1300201139	1		1954-05-22	福建省肿瘤医院	干部保健特需病房	2015-12-07		0	0	0	0	0	0	1	0	0	0	0	0	0	0	0	0	0	0	0	0	0	0	1	7	30	2	0	0						0	0	0	0	0	0
2014-12-27 10:43:39	800102950	1		1958-06-08	吉林大学白求恩第一医院	胃肠外科	2014-10-25		0	0	0	0	0	0	0	0	0	0	0	0	0	0	0	0	0	0	0	0	0	0	1	7	39	1	1	8	1					0	0	25	0	0	0
2014-03-28 16:09:04	1900100358	1		1948-03-02	中山大学第一附属医院	胃肠外科	2013-10-09	-1	0	0	0	0	0	0	1	1	1	0	0	0	0	0	0	0	0	0	0	0	0	0	1	3	40	1	0	0						0	0	0	0	1	7
2018-09-14 16:44:47	400102857	1		1956-10-11	重庆大坪医院	肿瘤科	2018-03-15	-1	0	0	0	0	0	0	0	0	0	0	0	0	0	0	0	0	0	0	1	0	0	0	1	1	40	1	0	0						0	0	0	0	0	0
2018-11-19 15:49:53	1300202587	1		1964-12-04	福建省肿瘤医院	干部保健特需病房	2018-11-19	-1	0	0	0	0	0	0	0	1	0	0	0	0	0	0	0	0	0	0	0	0	0	1	1	10	30	2	1	4			1			1	0	0	0	1	7		1
2016-12-27 11:19:12	400101879	1		1953-04-24	重庆大坪医院	肿瘤科	2016-11-15	-1	0	0	0	0	0	0	0	1	0	0	0	0	0	0	0	0	0	0	0	0	0	0	1	7	30	2	1	10	1					0	0	35	0	1	7	1	1
2016-05-10 10:59:39	1300200745	1		1950-04-01	福建省肿瘤医院	三十一区 腹部肿瘤内科	2015-01-16		0	0	0	0	0	0	0	0	0	0	0	0	0	0	0	0	0	0	0	0	0	0	1	7	3	2	0	0						0	0	0	0	0	0
2017-02-17 20:27:18	800105535	1		1954-05-24	吉林大学白求恩第一医院	胃肠外科	2015-08-19	-1	0	0	0	0	0	0	0	0	0	0	0	0	0	0	0	0	0	0	0	0	1	0	1	3	20	2	1	21	1		1			7	0	70	0	0	0
2017-08-01 16:50:26	1300201644	1		1950-04-13	福建省肿瘤医院	干部保健特需病房	2017-07-25		0	0	0	0	0	0	0	0	0	0	0	0	0	0	0	0	0	0	0	0	1	0	1	7	50	2	0	0						0	0	0	0	0	0
2017-03-22 23:03:55	800105810	1		1962-10-06	吉林大学白求恩第一医院	胃肠外科	2015-01-02		0	0	0	0	0	0	0	0	0	1	0	0	0	0	0	0	0	0	0	0	0	1	1	7	40	1	0	0						0	0	0	0	0	0
2014-05-17 23:39:09	800101411	1		1953-11-25	吉林大学白求恩第一医院	肿瘤中心	2014-01-09		0	0	0	0	0	0	0	0	0	0	0	0	0	0	0	0	0	0	0	0	0	0	1	7	35	1	1	7	1					0	0	14	0	0	0
2016-05-13 10:48:21	1300201253	2		1970-03-28	福建省肿瘤医院	干部保健特需病房	2016-03-04		0	0	0	0	0	0	0	0	0	0	0	0	0	0	0	0	0	0	0	0	0	0	0	0	0		0	0						0	0	0	0	0	0
2016-05-10 09:18:11	1300200659	2		1963-04-17	福建省肿瘤医院	干部保健特需病房	2014-10-25		0	0	0	0	0	0	0	0	0	0	0	0	0	0	0	0	0	0	0	0	0	0	0	0	0		0	0						0	0	0	0	0	0
2017-03-14 08:54:54	2400100280	2		1951-09-25	西京医院	胃肠外科	2017-01-16	-1	0	0	0	0	0	0	0	0	0	0	0	0	0	0	0	0	0	0	0	0	1	0	0	0	0	4	0	0						0	0	0	0	0	0
2017-03-02 17:07:18	2400100230	1		1962-06-20	西京医院	胃肠外科	2016-11-11	-1	0	0	0	0	0	0	0	0	0	0	0	0	0	0	0	0	0	0	0	0	0	0	0	0	0	4	0	0						0	0	0	0	0	0
2017-02-23 17:16:47	2400100181	2		1963-06-15	西京医院	胃肠外科	2016-07-19	-1	0	0	0	0	0	0	0	1	0	0	0	0	0	0	0	0	0	0	0	0	0	0	0	0	0	4	0	0						0	0	0	0	0	0
2015-03-19 10:15:07	300100062	2		1959-03-11	上海瑞金医院	外科三病区	2014-09-24	-1	0	0	0	0	0	0	0	0	0	0	0	0	0	0	0	0	0	0	0	0	0	0	0	0	0		0	0						0	0	0	0	0	0
2018-11-08 10:36:46	2300102445	2		1976-02-03	昆明医科大学第一附属医院	肿瘤外科	2018-10-18	-1	0	0	0	0	0	0	0	0	0	0	0	0	0	0	0	0	0	0	0	0	1	0	0	0	0	4	0	0						0	0	0	0	0	0
2016-05-13 10:30:39	1300200670	1		1944-08-29	福建省肿瘤医院	七区 胃肠肿瘤外科	2014-11-13		0	0	0	0	0	0	0	0	0	0	0	0	0	0	0	0	0	0	0	0	0	0	0	0	0		0	0						0	0	0	0	0	0
2016-05-20 15:04:12	500400015	2		1956-10-23	河北医科大学第二医院（东院）	普通外科	2013-11-04		0	0	0	0	0	0	0	0	0	0	0	0	0	0	0	0	0	0	0	0	0	0	0	0	0	-1	0	0						0	0	0	0	0	0
2014-02-26 14:33:22	800100440	1		1957-06-29	吉林大学白求恩第一医院	肿瘤中心	2013-07-01		0	0	0	0	0	0	0	1	0	0	0	0	0	0	0	0	0	0	0	0	0	0	0	0	0	-1	0	0						0	0	0	0	0	0
2015-04-17 11:24:29	2400100003	2		1969-03-28	西京医院	胃肠外科	2014-09-01	-1	0	0	0	0	0	0	0	0	0	0	0	0	0	0	0	0	0	0	0	0	0	0	0	0	0	-1	1	7	1		1			0.5	0	2	0	1	7	1
2014-09-18 20:16:34	2800100565	2		1950-10-25	广西医科大学附属肿瘤医院	胃肠一区	2014-08-11	-1	0	0	0	0	0	0	0	0	0	0	0	0	0	0	0	0	0	0	0	0	0	0	0	0	0	-1	0	0						0	0	0	0	0	0
2016-05-16 15:44:42	800102886	1		1944-07-18	吉林大学白求恩第一医院	胃肠外科	2014-08-14		0	0	0	0	0	0	0	0	0	0	0	0	0	0	0	0	0	0	0	0	0	0	0	0	0	-1	0	0						0	0	0	0	0	0
2015-03-19 10:21:42	300100119	2		1959-11-21	上海瑞金医院	外科一病区	2014-11-08	-1	0	0	0	0	0	0	0	1	0	0	0	0	0	0	0	0	0	0	0	0	0	0	0	0	0		0	0						0	0	0	0	0	0
2015-10-20 16:31:14	400200240	2		1964-05-27	重庆市第三人民医院	肿瘤血液科	2015-10-08	-1	0	0	0	0	0	0	0	0	0	0	0	0	0	0	0	0	0	0	0	0	0	0	0	0	0	-1	0	0						0	0	0	0	0	0
2014-06-22 20:56:09	800101869	1		1949-07-08	吉林大学白求恩第一医院	胃肠外科	2014-04-08	-1	0	0	0	0	0	0	0	0	0	0	0	0	0	0	0	0	0	0	0	0	0	0	0	0	0	-1	0	0						0	0	0	0	1	7	1
2014-07-04 23:12:28	800101998	2		1954-10-21	吉林大学白求恩第一医院	胃肠外科	2014-05-09		0	0	0	0	0	0	0	0	0	1	0	0	0	0	0	0	0	0	0	0	0	0	0	0	0	-1	0	0						0	0	0	0	0	0
2015-02-04 21:40:53	800103200	1		1951-10-02	吉林大学白求恩第一医院	胃肠外科	2014-07-25		0	0	0	0	0	0	0	0	0	0	0	0	0	0	0	0	0	0	0	0	0	0	0	0	0	-1	0	0						0	0	0	0	0	0
2015-10-29 16:25:41	2400100089	1		1955-08-18	西京医院	胃肠外科	2015-10-15	-1	0	0	0	0	0	0	0	0	0	0	0	0	0	0	0	0	0	0	0	0	0	0	0	0	0	-1	0	0						0	0	0	0	0	0
2015-12-19 22:35:02	800102578	2		1954-11-22	吉林大学白求恩第一医院	肿瘤中心	2014-08-14	-1	0	0	0	0	0	0	0	0	0	0	0	0	0	0	0	0	0	0	0	0	0	0	0	0	0	-1	0	0						0	0	0	0	0	0
2015-03-19 09:15:50	300100059	2		1955-07-12	上海瑞金医院	外科三病区	2014-09-22	-1	0	0	0	0	0	0	0	0	0	0	0	0	0	0	0	0	0	0	0	0	0	0	0	0	0		0	0						0	0	0	0	0	0
2015-08-06 20:55:32	800104207	1		1956-05-12	吉林大学白求恩第一医院	胃肠外科	2015-07-06	-1	0	1	0	0	0	0	0	0	0	0	0	0	0	0	0	0	0	0	0	0	0	0	0	0	0	-1	0	0						0	0	0	0	1	2
2017-02-07 09:22:41	2400100160	2	1	1949-02-06	西京医院	胃肠外科	2016-07-22	-1	0	0	0	0	0	0	1	1	0	0	0	0	0	0	0	0	0	0	0	0	0	0	0	0	0	-1	0	0						0	0	0	0	0	0
2015-10-03 22:24:07	800104864	1		1975-10-28	吉林大学白求恩第一医院	胃肠外科	2015-08-10		0	1	0	0	0	0	0	0	0	0	0	0	0	0	0	0	0	0	0	0	0	0	0	0	0	-1	0	0						0	0	0	0	0	0
2015-10-15 16:43:42	400200204	2		1966-09-10	重庆市第三人民医院	普外科	2015-08-28	-1	0	0	0	0	0	0	0	0	0	0	0	0	0	0	0	0	0	0	0	0	0	1	0	0	0	-1	0	0						0	0	0	0	0	0
2016-05-13 09:18:41	1300200105	2		1955-02-01	福建省肿瘤医院	二区 胸部肿瘤外科	2014-03-31		0	0	0	0	0	0	0	0	0	0	0	0	0	0	0	0	0	0	0	0	0	0	0	0	0		0	0						0	0	0	0	0	0
2017-03-28 23:29:45	800105914	2		1986-03-01	吉林大学白求恩第一医院	胃肠外科	2016-01-08		0	0	0	0	0	0	0	0	0	0	0	0	0	0	0	0	0	0	0	0	1	1	0	0	0	4	0	0						0	0	0	0	0	0
2014-03-18 11:56:09	800101068	2		1965-02-10	吉林大学白求恩第一医院	肿瘤中心	2014-02-20		0	1	0	0	0	0	0	0	0	0	0	0	0	0	0	0	0	0	0	0	0	0	0	0	0	-1	0	0						0	0	0	0	0	0
2019-12-19 18:01:24	800109669	2	1	1955-02-15	吉林大学白求恩第一医院	肿瘤中心	2019-11-08	-1	0	0	0	0	0	0	0	0	0	0	0	0	0	0	0	0	0	0	0	0	1	0	0	0	0	4	0	0						0	0	0	0	0	0
2016-05-10 09:13:54	1300200653	2		1958-11-18	福建省肿瘤医院	干部保健特需病房	2014-10-29		0	0	0	0	0	0	0	0	0	0	0	0	0	0	0	0	0	0	0	0	0	0	0	0	0		0	0						0	0	0	0	1	7
2016-06-24 09:00:26	1300201284	2	1	1949-11-01	福建省肿瘤医院	干部保健特需病房	2016-04-13		0	0	0	0	0	0	1	1	0	0	0	0	0	0	0	0	0	0	0	0	0	0	0	0	0		0	0						0	0	0	0	0	0
2016-07-11 10:16:10	1300201327	2		1961-02-05	福建省肿瘤医院	干部保健特需病房	2016-06-01		0	0	0	0	0	0	0	0	0	0	0	0	0	0	0	0	0	0	0	0	1	0	0	0	0		0	0						0	0	0	0	0	0
2016-06-27 17:20:58	1300201302	2		1981-09-13	福建省肿瘤医院	干部保健特需病房	2016-05-10		0	0	0	0	0	0	0	0	0	0	0	0	0	0	0	0	0	0	0	0	1	0	0	0	0	-1	0	0						0	0	0	0	0	0
2018-06-09 10:24:11	800106574	2	1	1946-12-08	吉林大学白求恩第一医院	肿瘤中心	2017-07-26	-1	0	0	0	0	0	0	0	0	1	1	0	0	0	0	0	0	0	0	0	0	0	0	0	0	0	4	0	0						0	0	0	0	0	0
2019-03-15 20:26:00	800108079	2	1	1965-11-10	吉林大学白求恩第一医院	肿瘤中心	2018-06-26	-1	0	0	0	0	0	0	0	0	0	0	0	0	0	0	0	0	0	0	0	0	1	1	0	0	0	4	0	0						0	0	0	0	0	0
2019-04-01 13:17:55	800108197	2	1	1953-12-12	吉林大学白求恩第一医院	肿瘤中心	2018-12-24	-1	0	1	0	0	0	0	0	1	1	0	0	0	0	0	0	0	0	0	0	0	0	1	0	0	0	4	0	0						0	0	0	0	0	0
2019-01-28 10:31:42	800107944	2	1	1952-10-13	吉林大学白求恩第一医院	肿瘤中心	2018-04-09	-1	0	0	0	0	0	0	0	1	0	0	0	0	0	0	0	0	0	0	0	0	0	0	0	0	0	4	0	0						0	0	0	0	0	0
2016-05-19 13:55:29	500700200	2		1963-06-27	邢台市人民医院	肿瘤内科	2014-10-27	-1	0	0	0	0	0	0	1	1	0	0	0	0	0	0	0	0	0	0	0	0	0	0	0	0	0		0	0						0	0	0	0	0	0
2018-10-26 10:41:34	1300202545	2		1954-08-11	福建省肿瘤医院	干部保健特需病房	2018-10-22	-1	0	0	0	0	0	0	0	0	0	0	0	0	0	0	0	0	0	0	0	0	1	0	0	0	0	4	0	0						0	0	0	0	0	0
2019-12-05 23:42:37	800109483	1		1966-07-07	吉林大学白求恩第一医院	肿瘤中心	2019-02-21	-1	0	0	0	0	0	0	0	1	0	0	0	0	0	0	0	0	0	0	0	0	0	0	0	0	0	4	1	7			1			7	0	14	0	0	0
2016-05-06 11:27:48	3200100010	1		1950-02-05	新疆喀什地区第一人民医院	普外三科	2014-05-09		0	0	0	0	0	0	0	0	0	0	0	0	0	0	0	0	0	0	0	0	0	0	0	0	0		0	0						0	0	0	0	0	0
2016-05-19 13:36:59	500700163	2		1952-05-09	邢台市人民医院	肿瘤内科	2014-06-10	-1	0	0	0	0	0	0	0	0	0	0	0	0	0	0	0	0	0	0	0	0	0	0	0	0	0		0	0						0	0	0	0	0	0
2019-01-03 15:49:39	2300102678	2		1974-07-11	昆明医科大学第一附属医院	普外一科（胃肠与疝外科）	2018-12-13	-1	0	0	0	0	0	0	0	0	0	0	0	0	0	0	0	0	0	0	0	0	1	0	0	0	0	4	0	0						0	0	0	0	0	0
2019-12-26 15:58:08	800109913	1		1952-02-23	吉林大学白求恩第一医院	肿瘤中心	2019-11-04	-1	0	0	0	0	0	0	0	0	0	0	0	0	0	0	0	0	0	0	0	0	1	0	0	0	0	4	0	0						0	0	0	0	0	0
2016-05-13 15:15:12	1300200061	2		1963-09-27	福建省肿瘤医院	七区 胃肠肿瘤外科	2014-03-13		0	0	0	0	0	0	0	0	0	0	0	0	0	0	0	0	0	0	0	0	0	0	0	0	0		0	0						0	0	0	0	0	0
2014-06-26 19:17:40	800101897	1		1952-04-16	吉林大学白求恩第一医院	胃肠外科	2014-03-28		0	0	0	0	0	0	0	0	0	0	0	0	0	0	0	0	0	0	0	0	0	0	0	0	0	-1	1	4	1					0	0	8	0	1	5	1	1
2016-05-13 15:14:08	1300200057	1		1956-08-07	福建省肿瘤医院	七区 胃肠肿瘤外科	2014-02-07		0	0	0	0	0	0	0	0	0	0	0	0	0	0	0	0	0	0	0	0	0	0	0	0	0		0	0						0	0	0	0	0	0
2016-05-13 10:56:04	1300201238	2		1976-11-15	福建省肿瘤医院	七区 胃肠肿瘤外科	2016-01-25		0	0	0	0	0	0	0	0	0	0	0	0	0	0	0	0	0	0	0	0	0	0	0	0	0		0	0						0	0	0	0	0	0
2016-05-06 11:47:10	3200100140	1		1970-03-07	新疆喀什地区第一人民医院	心胸外科	2014-08-25		0	0	0	0	0	0	0	0	0	0	0	0	0	0	0	0	0	0	0	0	0	0	0	0	0		0	0						0	0	0	0	0	0
2017-08-16 09:36:03	1300201692	2	1	1965-04-14	福建省肿瘤医院	二区 胸部肿瘤外科	2017-08-01	-1	0	0	0	0	0	0	0	0	0	0	0	0	0	0	0	0	0	0	0	0	1	0	0	0	0	4	0	0						0	0	0	0	0	0
2019-12-08 20:31:30	800109522	2	1	1958-08-26	吉林大学白求恩第一医院	肿瘤中心	2019-07-15	-1	0	0	0	0	0	0	0	0	0	0	0	0	0	0	0	0	0	0	0	0	1	1	0	0	0	4	0	0						0	0	0	0	0	0
2018-09-30 11:06:00	100900406	1		1958-02-03	首都医科大学附属北京世纪坛医院	胃肠外科	2018-09-03	-1	0	0	0	0	0	0	0	0	0	0	0	0	0	0	0	0	0	0	0	0	1	0	0	0	0	4	0	0						0	0	0	0	0	0
2019-02-14 10:47:22	2300102779	1		1952-09-23	昆明医科大学第一附属医院	普外一科（胃肠与疝外科）	2018-11-02	-1	0	0	0	0	0	0	0	1	0	0	0	0	0	0	0	0	0	0	0	0	0	0	0	0	0	4	0	0						0	0	0	0	0	0
2017-02-21 16:38:22	2400100168	1		1951-01-27	西京医院	胃肠外科	2016-07-25	-1	0	0	0	0	0	0	0	0	0	0	0	0	0	0	0	0	0	0	0	0	1	0	0	14	15	3	1	1	1					1	0	0	0	0	0
2016-05-04 10:28:23	1300200324	2		1960-02-09	福建省肿瘤医院	干部保健特需病房	2014-06-06		0	0	0	0	0	0	0	0	0	0	0	0	0	0	0	0	0	0	0	0	0	0	0	0	0		0	0						0	0	0	0	0	0
2018-11-19 09:40:43	2300102464	2	1	1961-03-14	昆明医科大学第一附属医院	肿瘤外科	2018-10-25	-1	0	0	0	0	0	0	0	0	0	0	1	0	0	0	0	0	0	0	0	0	0	0	0	0	0	4	0	0						0	0	0	0	0	0
2014-08-10 15:33:44	800102357	1		1950-11-05	吉林大学白求恩第一医院	肿瘤中心	2013-11-20		1	1	0	0	0	0	0	0	0	0	0	0	0	0	0	0	0	0	0	0	0	0	0	0	0	-1	0	0						0	0	0	0	0	0
2016-05-19 13:51:35	500700187	1		1943-05-19	邢台市人民医院	肿瘤内科	2014-08-07	-1	0	0	0	0	0	0	0	0	0	0	0	0	0	0	0	0	0	0	0	0	0	0	0	0	0		0	0						0	0	0	0	0	0
2016-05-13 15:01:17	1300201193	1		1946-08-04	福建省肿瘤医院	干部保健特需病房	2016-01-22		0	0	0	0	0	0	1	0	0	0	0	0	0	0	0	0	0	0	0	0	0	0	0	0	0		0	0						0	0	0	0	0	0
2016-05-11 16:33:43	1300201023	2		1956-08-21	福建省肿瘤医院	干部保健特需病房	2015-07-27		0	0	0	0	0	0	1	0	0	0	0	0	0	0	0	0	0	0	0	0	0	0	0	0	0		0	0						0	0	0	0	0	0
2017-03-02 20:47:52	2400100236	2	1	1974-09-27	西京医院	胃肠外科	2016-12-14	-1	0	0	0	0	0	0	0	0	0	0	0	0	0	0	0	0	0	0	0	0	1	0	0	0	0	4	0	0						0	0	0	0	0	0
2015-04-10 23:40:02	800103393	2		1950-04-08	吉林大学白求恩第一医院	胃肠外科	2014-09-15		0	0	0	0	0	0	0	0	0	0	0	0	0	0	0	0	0	0	0	0	0	0	0	0	0	-1	0	0						0	0	0	0	0	0
2016-05-13 14:52:50	1300201222	2		1959-05-02	福建省肿瘤医院	七区 胃肠肿瘤外科	2015-08-26		0	0	0	0	0	0	0	0	0	0	0	0	0	0	0	0	0	0	0	0	0	0	0	0	0		0	0						0	0	0	0	0	0
2015-08-03 00:28:51	800104036	2		1954-12-18	吉林大学白求恩第一医院	肿瘤中心	2015-05-03		0	0	0	0	0	0	0	0	0	0	0	0	0	0	0	0	0	0	0	0	0	0	0	0	0	-1	0	0						0	0	0	0	0	0
2016-05-12 10:34:41	1300201086	2		1997-01-10	福建省肿瘤医院	干部保健特需病房	2015-10-19		0	0	0	0	0	0	0	0	0	0	0	0	0	0	0	0	0	0	0	0	0	0	0	0	0		0	0						0	0	0	0	0	0
2016-05-10 16:23:08	1300200845	2		1957-12-07	福建省肿瘤医院	七区 胃肠肿瘤外科	2014-12-11		0	0	0	0	0	0	0	0	0	0	0	0	0	0	0	0	0	0	0	0	0	0	0	0	0		0	0						0	0	0	0	0	0
2019-12-25 23:06:14	800109887	1		1952-02-07	吉林大学白求恩第一医院	肿瘤中心	2019-11-05	-1	0	0	0	0	0	0	0	0	0	0	0	0	0	0	0	0	0	0	0	0	1	0	0	0	0	4	0	0						0	0	0	0	0	0
2016-12-23 09:55:20	400101833	1		1958-03-04	重庆大坪医院	泌尿科	2016-09-30		0	0	0	0	0	0	0	0	0	0	0	0	0	0	0	0	0	0	0	0	1	0	0	0	0	-1	0	0						0	0	0	0	0	0
2017-03-28 16:46:15	1300201530	2	1	1957-04-20	福建省肿瘤医院	干部保健特需病房	2017-03-20		0	0	0	0	0	0	0	1	0	0	0	0	0	0	0	0	0	0	0	0	0	0	0	0	0	4	0	0						0	0	0	0	0	0
2014-08-22 21:21:28	800102438	2		1962-06-06	吉林大学白求恩第一医院	胃肠外科	2014-06-18	-1	0	0	0	0	0	0	0	0	0	0	0	0	0	0	0	0	0	0	0	0	0	0	0	0	0	-1	0	0						0	0	0	0	0	0
2019-01-02 11:56:34	2300102666	1		1968-08-09	昆明医科大学第一附属医院	普外一科（胃肠与疝外科）	2018-12-23	-1	0	0	0	0	0	0	0	0	0	0	0	0	0	0	0	0	0	0	0	0	1	1	0	0	0	4	0	0						0	0	0	0	1	7	1	1
2014-09-19 10:06:35	100400026	1		1981-02-02	中国医学科学院肿瘤医院	综合科	2014-08-21		0	0	0	0	0	0	0	0	0	0	0	0	0	0	0	0	0	0	0	0	0	0	0	0	0	-1	0	0						0	0	0	0	0	0
2016-01-18 15:04:00	400101100	2		1974-11-09	重庆大坪医院	胃结直肠外科	2015-10-29	-1	0	1	0	0	0	0	0	0	0	0	0	0	0	0	0	0	0	0	0	0	0	0	0	0	0	-1	0	0						0	0	0	0	0	0
2016-05-13 10:34:08	1300200721	2		1977-06-08	福建省肿瘤医院	七区 胃肠肿瘤外科	2014-10-08		0	0	0	0	0	0	0	0	0	0	0	0	0	0	0	0	0	0	0	0	0	0	0	0	0		0	0						0	0	0	0	0	0
2014-12-05 15:10:13	800102814	2		1952-09-17	吉林大学白求恩第一医院	胃肠外科	2014-08-07	-1	0	0	0	0	0	0	0	0	0	0	0	0	0	0	0	0	0	0	0	0	0	0	0	0	0	-1	0	0						0	0	0	0	0	0
2014-09-16 12:50:55	800102604	2		1945-07-14	吉林大学白求恩第一医院	胃肠外科	2014-05-16	-1	0	0	0	0	0	0	0	0	0	1	0	0	0	0	0	0	0	0	0	0	0	0	0	0	0	-1	0	0						0	0	0	0	0	0
2016-07-21 15:39:52	400101403	2		1985-08-05	重庆大坪医院	肿瘤科	2016-03-31		0	0	0	0	0	0	0	0	0	0	0	0	0	0	0	0	0	0	0	0	0	0	0	0	0	-1	0	0						0	0	0	0	0	0
2016-06-27 16:58:13	1300201297	2		1966-09-05	福建省肿瘤医院	干部保健特需病房	2016-05-13		0	0	0	0	0	0	0	0	0	0	0	0	0	0	0	0	0	0	0	0	1	0	0	0	0		0	0						0	0	0	0	0	0
2016-05-13 10:37:17	1300200979	1		1957-07-26	福建省肿瘤医院	七区 胃肠肿瘤外科	2015-05-26		0	0	0	0	0	0	0	0	0	0	0	0	0	0	0	0	0	0	0	0	0	0	0	0	0		0	0						0	0	0	0	0	0
2014-08-23 18:23:31	800102476	2		1961-10-04	吉林大学白求恩第一医院	肿瘤中心	2014-06-11		0	0	0	0	0	0	0	1	0	0	0	0	0	0	0	0	0	0	0	0	0	0	0	0	0	-1	0	0						0	0	0	0	1	7
2016-05-13 15:07:49	1300200016	2		1966-05-22	福建省肿瘤医院	干部保健特需病房	2014-01-24		0	0	0	0	0	0	0	0	0	0	0	0	0	0	0	0	0	0	0	0	0	0	0	0	0		0	0						0	0	0	0	0	0
2014-02-25 16:33:28	800100292	1		1967-10-04	吉林大学白求恩第一医院	肿瘤中心	2013-12-10		0	0	0	0	0	0	0	0	0	0	0	0	0	0	0	0	0	0	0	0	0	0	1	10	15	1	0	0						0	0	0	0	0	0
2017-02-28 14:42:59	2400100214	1		1962-05-16	西京医院	胃肠外科	2016-05-23	-1	0	0	0	0	0	0	0	0	0	0	0	0	0	0	0	0	0	0	0	0	0	0	1	7	30	3	1	7	1					0	0	2	0	0	0
2014-11-04 15:42:01	1900500292	1		1952-06-14	广东省人民医院	普外一病区	2013-05-06	-1	0	0	0	0	0	0	0	0	0	0	0	0	0	0	0	0	0	0	0	0	0	0	1	14	40	1	0	0						0	0	0	0	0	0
2015-05-05 15:39:43	100200126	1		1967-06-18	北京肿瘤医院	胃肠外二	2015-03-07	-1	0	0	0	0	0	0	0	0	0	0	0	0	0	0	0	0	0	0	0	0	0	0	1	4	20		0	0						0	0	0	0	0	0
2014-09-01 09:05:08	800102545	2		1965-07-14	吉林大学白求恩第一医院	胃肠外科	2014-05-29	-1	0	0	0	0	0	0	0	0	0	0	0	0	0	0	0	0	0	0	0	0	0	0	1	3	22	1	0	0						0	0	0	0	0	0
2015-07-29 21:40:04	800103954	1		1952-02-03	吉林大学白求恩第一医院	胃肠外科	2015-04-27		0	0	0	0	0	0	0	0	0	0	0	0	0	0	0	0	0	0	0	0	0	0	1	7	35	1	0	0						0	0	0	0	0	0
2016-05-06 11:34:26	3200100050	1		1970-05-15	新疆喀什地区第一人民医院	心胸外科	2014-06-09		0	0	0	0	0	0	0	0	0	1	0	0	0	0	0	0	0	0	0	0	0	1	1	3	10	4	0	0						0	0	0	0	1	1
2014-06-26 18:49:13	800101894	2		1954-11-27	吉林大学白求恩第一医院	胃肠外科	2014-04-10		0	0	1	0	0	0	0	1	0	0	0	0	0	0	0	0	0	0	0	0	0	0	1	1	40	1	0	0						0	0	0	0	0	0
2015-02-04 20:05:36	800103195	1		1952-11-07	吉林大学白求恩第一医院	肿瘤中心	2014-07-22		0	0	0	0	0	0	0	1	0	0	0	0	0	0	0	0	0	0	0	0	0	0	1	7	23	1	0	0						0	0	0	0	1	7	1
2017-03-27 13:01:16	800105879	2	1	1953-11-24	吉林大学白求恩第一医院	肿瘤中心	2015-09-14		0	0	0	0	0	0	0	0	0	0	0	0	0	0	0	0	0	0	0	0	1	0	1	2	20	2	0	0						0	0	0	0	0	0
2017-08-14 16:04:20	1300201687	1		1947-10-11	福建省肿瘤医院	干部保健特需病房	2017-08-09		0	0	0	0	0	0	0	1	0	0	0	0	0	0	0	0	0	0	0	0	0	0	1	7	18	3	0	0						0	0	0	0	1	3
2018-03-23 09:55:03	1300202256	1		1956-10-09	福建省肿瘤医院	干部保健特需病房	2018-03-05	-1	0	0	0	0	0	0	1	1	0	0	0	0	0	0	0	0	0	0	0	0	0	0	1	3	10	3	1	7			1	1		10	0	0	0	0	0
2018-03-13 11:48:01	800106499	1		1955-12-14	吉林大学白求恩第一医院	肿瘤中心	2017-07-30		0	0	0	0	0	0	0	0	0	0	0	0	0	0	0	0	0	0	0	0	1	1	1	6	40	1	1	7	1					0	0	35	0	1	7
2016-05-19 13:52:11	500700189	1		1949-09-10	邢台市人民医院	肿瘤内科	2014-06-02	-1	0	0	0	0	0	0	0	1	0	0	0	0	0	0	0	0	0	0	0	0	0	0	1	3	15	2	0	0						0	0	0	0	0	0
2019-05-27 13:03:33	800108315	1		1949-10-28	吉林大学白求恩第一医院	肿瘤中心	2019-02-18	-1	0	0	0	0	0	0	0	0	0	0	0	0	0	0	0	0	0	0	0	0	1	0	1	6	55	1	0	0						0	0	0	0	0	0
2019-01-08 10:23:44	400103074	1		1966-04-09	重庆大坪医院	肿瘤科	2018-05-21	-1	0	0	0	1	0	0	0	0	0	0	0	0	0	0	0	0	0	0	0	0	0	0	1	7	30	3	0	0						0	0	0	0	0	0
2015-08-18 11:11:49	800104479	1		1954-09-08	吉林大学白求恩第一医院	肿瘤中心	2015-06-09		0	0	0	0	0	0	0	0	0	0	0	0	0	0	0	0	0	0	0	0	0	0	1	4	34	1	1	14	1					0	0	28	0	0	0
2019-12-08 21:08:36	800109524	2		1969-02-05	吉林大学白求恩第一医院	肿瘤中心	2019-10-21	-1	0	0	0	0	0	0	0	0	0	0	0	0	0	0	0	0	0	0	0	0	1	0	1	4	15	2	0	0						0	0	0	0	0	0
2016-05-03 10:35:24	1300200239	1		1951-07-17	福建省肿瘤医院	七区 胃肠肿瘤外科	2014-05-04		0	0	0	0	0	0	0	1	0	0	0	0	0	0	0	0	0	0	0	0	0	0	1	1	40	2	0	0						0	0	0	0	1	7	1
2016-01-08 10:55:31	400200313	1		1949-01-30	重庆市第三人民医院	普外科	2015-12-07	-1	0	0	0	0	0	0	0	0	0	0	0	0	0	0	0	0	0	0	0	0	0	0	1	7	42	2	0	0						0	0	0	0	1	7	1
2017-05-26 11:24:44	400102073	1		1952-12-16	重庆大坪医院	胃结直肠外科	2017-02-20	-1	0	0	0	0	0	0	0	1	0	0	0	0	0	0	0	0	0	0	0	0	0	0	1	7	40	1	0	0						0	0	0	0	0	0
2016-05-19 12:38:20	500700129	1		1948-08-07	邢台市人民医院	肿瘤内科	2014-02-07	-1	0	0	0	0	0	0	0	0	0	0	0	0	0	0	0	0	0	0	0	0	0	0	1	7	7	2	0	0						0	0	0	0	0	0
2018-12-24 10:04:45	800106851	1		1948-08-30	吉林大学白求恩第一医院	肿瘤中心	2018-03-07	-1	0	0	0	0	0	0	0	0	0	0	0	0	0	0	0	0	0	0	0	0	1	0	1	4	45	2	1	6	1					0	0	6	0	1	4	1	1
2019-11-18 14:57:47	800109112	1		1950-09-12	吉林大学白求恩第一医院	肿瘤中心	2018-08-16	-1	0	0	0	0	0	0	0	1	0	0	0	0	0	0	0	0	0	0	0	0	0	0	1	5	30	1	0	0						0	0	0	0	0	0
2019-03-28 09:16:55	2300102898	1		1957-05-11	昆明医科大学第一附属医院	普外一科（胃肠与疝外科）	2019-03-07	-1	0	0	0	0	0	0	0	1	0	0	0	0	0	0	0	0	0	0	0	0	0	0	1	4	35	2	0	0						0	0	0	0	0	0
2018-12-14 09:01:59	1300202615	1		1961-08-14	福建省肿瘤医院	干部保健特需病房	2018-11-29	-1	0	0	0	0	0	0	0	0	0	0	0	0	0	0	0	0	0	0	0	0	1	0	1	4	30	2	1	7	1					0	0	5	0	1	1		1
2017-03-11 22:46:01	800105731	1		1948-07-01	吉林大学白求恩第一医院	胃肠外科	2015-09-08		0	0	0	0	0	0	0	0	0	0	0	0	0	0	0	0	0	0	0	0	1	0	1	7	40	1	1	14	1					0	0	14	0	0	0
2016-05-19 13:52:38	500700190	1		1944-05-25	邢台市人民医院	肿瘤内科	2014-05-19	-1	0	0	0	0	0	0	0	0	0	0	0	0	0	0	0	0	0	0	0	0	0	0	1	3	25	2	0	0						0	0	0	0	0	0
2016-05-19 13:55:15	500700199	1		1946-06-20	邢台市人民医院	肿瘤内科	2014-10-19	-1	0	0	0	0	0	0	1	0	0	0	0	0	0	0	0	0	0	0	0	0	0	0	1	7	16	2	0	0						0	0	0	0	0	0
2016-05-19 12:34:43	500700123	1		1949-08-26	邢台市人民医院	肿瘤外科	2014-12-09	-1	0	0	0	0	0	0	0	1	0	0	0	0	0	0	0	0	0	0	0	0	0	0	1	7	40	2	0	0						0	0	0	0	0	0
2016-05-19 10:53:21	500700104	1		1948-09-30	邢台市人民医院	肿瘤内科	2014-05-10	-1	0	0	0	0	0	0	0	0	0	0	0	0	0	0	0	0	0	0	0	0	0	0	1	2	20	2	1	1	1					0	0	5	0	0	0
2015-10-21 20:38:59	1901300193	1		1947-08-09	佛山市第一人民医院	肿瘤内科	2013-02-25		0	1	0	0	0	0	0	0	0	0	0	0	0	0	0	0	0	0	0	0	0	1	1	7	30	1	0	0						0	0	0	0	0	0
2021-02-08 17:36:08	700200122	1		1966-08-09	辽宁省肿瘤医院	消化内一科	2019-03-15	-1	0	0	0	0	0	0	0	0	0	1	1	0	0	0	0	0	0	0	0	0	0	1	1	11	20	3	0	0						0	0	0	0	0	0
2016-05-11 10:08:10	1300200937	1		1946-01-04	福建省肿瘤医院	干部保健特需病房	2015-06-23		0	0	0	0	0	0	0	0	0	0	0	0	0	0	0	0	0	0	0	0	0	0	1	7	5	3	1	7	1					0	0	15	0	1	15		1
2015-04-27 14:04:20	800103706	1		1952-08-22	吉林大学白求恩第一医院	胃肠外科	2015-01-30		0	0	0	0	0	0	0	0	0	0	0	0	0	0	0	0	0	0	0	0	0	0	1	21	40	1	1	7	1					0	0	14	0	0	0
2019-11-23 20:22:37	800109361	2		1975-01-11	吉林大学白求恩第一医院	肿瘤中心	2019-06-10	-1	0	0	0	0	0	0	0	0	0	0	0	0	0	0	0	0	0	0	0	0	1	1	1	10	20	3	0	0						0	0	0	0	0	0
2014-11-17 15:59:18	800102722	1		1944-12-13	吉林大学白求恩第一医院	胃肠外科	2014-05-22		0	0	0	0	0	0	0	0	0	0	0	0	0	0	0	0	0	0	0	0	0	0	1	7	10	2	0	0						0	0	0	0	0	0
2015-11-19 22:50:46	800105076	2		1964-07-23	吉林大学白求恩第一医院	胃肠外科	2015-07-24	-1	0	0	0	0	0	0	0	0	0	0	0	0	0	0	0	0	0	0	0	0	0	1	1	1	3	3	1	1	1					0	0	2	0	1	14	1	1
2016-05-10 16:19:30	1300200839	1		1953-08-14	福建省肿瘤医院	三十一区 腹部肿瘤内科	2015-05-26		0	0	0	0	0	0	0	0	0	0	0	0	0	0	0	0	0	0	0	0	0	1	1	7	40	2	0	0						0	0	0	0	0	0
2014-07-26 12:53:39	800102254	1		1979-04-29	吉林大学白求恩第一医院	胃肠外科	2014-05-04		0	0	0	0	0	0	0	0	0	0	0	0	0	0	0	0	0	0	0	0	0	0	1	8	15	1	1	7			1			7	0	0	0	0	0
2016-05-13 08:52:44	1300201218	1		1951-10-01	福建省肿瘤医院	七区 胃肠肿瘤外科	2015-09-14		0	0	0	0	0	0	0	0	0	0	0	0	0	0	0	0	0	0	0	0	0	0	1	1	40	1	0	0						0	0	0	0	0	0
2016-05-13 12:10:45	1300201231	1		1955-08-25	福建省肿瘤医院	七区 胃肠肿瘤外科	2015-07-06		0	0	0	0	0	0	0	0	0	0	0	0	0	0	0	0	0	0	0	0	0	0	1	7	20	1	0	0						0	0	0	0	0	0
2014-12-30 21:18:16	400100379	1		1960-03-04	重庆大坪医院	胃结直肠外科	2014-12-18	-1	0	0	0	0	0	0	0	0	0	0	0	0	0	0	0	0	0	0	0	0	0	0	1	10	30	3	1	7	1					0	0	20	0	1	7
2019-11-21 12:17:36	800109248	1		1972-11-02	吉林大学白求恩第一医院	肿瘤中心	2018-11-28	-1	0	0	0	0	0	0	0	0	0	0	0	0	0	0	0	0	0	0	0	0	1	0	1	7	15	3	0	0						0	0	0	0	0	0
2016-05-13 09:06:39	1300201247	1		1982-04-02	福建省肿瘤医院	七区 胃肠肿瘤外科	2015-10-07		0	0	0	0	0	0	0	0	0	0	0	0	0	0	0	0	0	0	0	0	0	0	1	7	10	1	0	0						0	0	0	0	0	0
2017-03-14 11:14:19	2400100285	1		1966-12-09	西京医院	胃肠外科	2017-02-05	-1	0	0	0	0	0	0	0	0	0	0	0	0	0	0	0	0	0	0	0	0	1	0	1	5	30	3	0	0						0	0	0	0	0	0
2016-05-13 15:09:01	1300200024	1		1972-11-17	福建省肿瘤医院	干部保健特需病房	2014-02-10		0	0	0	0	0	0	0	0	0	0	0	0	0	0	0	0	0	0	0	0	0	0	1	14	20	2	0	0						0	0	0	0	0	0
2014-07-05 11:53:09	800102006	1		1956-06-28	吉林大学白求恩第一医院	胃肠外科	2014-05-12		0	0	0	0	0	0	0	0	0	0	0	0	0	0	0	0	0	0	0	0	0	0	1	7	20	1	1	7	1					0	0	42	0	0	0
2014-07-20 21:11:18	800102179	1		1961-01-09	吉林大学白求恩第一医院	胃肠外科	2014-05-09	-1	0	0	0	0	0	0	0	0	1	0	0	0	0	0	0	0	0	0	0	0	0	0	1	7	20	1	1	7	1		1			7	0	7	0	0	0
2019-11-23 21:05:49	800109368	2	1	1963-08-20	吉林大学白求恩第一医院	肿瘤中心	2019-04-08	-1	0	0	0	0	0	0	1	1	0	0	0	1	0	0	0	0	0	0	0	0	0	0	1	6	40	1	0	0						0	0	0	0	0	0
2017-11-14 14:46:04	800106151	2	1	1949-01-26	吉林大学白求恩第一医院	肿瘤中心	2017-06-26	-1	0	0	0	0	0	0	0	1	0	0	0	0	0	0	0	0	0	0	0	0	0	1	0	0	0	4	0	0						0	0	0	0	1	7
2015-03-19 09:47:27	300100121	2		1969-11-10	上海瑞金医院	外科三病区	2014-11-10	-1	0	0	0	0	0	0	0	0	0	0	0	0	0	0	0	0	0	0	0	0	0	0	0	0	0		0	0						0	0	0	0	0	0
2015-04-14 16:13:39	800103517	2		1953-02-19	吉林大学白求恩第一医院	胃肠外科	2015-01-11	-1	0	0	0	0	0	0	0	1	0	0	0	0	0	0	0	0	0	0	0	0	0	0	0	0	0	-1	0	0						0	0	0	0	0	0
2015-02-05 16:08:49	2100100833	2		1970-05-15	四川大学华西医院	胃肠二	2014-09-10	-1	0	0	0	0	0	0	0	0	0	0	0	0	0	0	0	0	0	0	0	0	0	0	0	0	0		0	0						0	0	0	0	0	0
2014-12-04 15:35:23	800102776	1		1948-12-29	吉林大学白求恩第一医院	胃肠外科	2014-06-19		0	0	0	0	0	0	0	0	0	0	0	0	0	0	0	0	0	0	0	0	0	0	0	0	0	-1	0	0						0	0	0	0	1	7	1
2014-12-04 16:55:40	800102789	2		1963-08-19	吉林大学白求恩第一医院	胃肠外科	2014-07-23	-1	0	0	0	0	0	0	0	0	0	0	0	0	0	0	0	0	0	0	0	0	0	1	0	0	0	-1	0	0						0	0	0	0	0	0
2016-03-09 18:14:08	400101118	1		1948-02-24	重庆大坪医院	胃结直肠外科	2015-12-09	-1	0	0	0	0	0	0	0	0	0	0	0	0	0	0	0	0	0	0	0	0	0	0	0	0	0	-1	0	0						0	0	0	0	0	0
2016-05-19 12:37:16	500700127	2		1958-03-15	邢台市人民医院	肿瘤内科	2014-12-08	-1	0	0	0	0	0	0	0	0	0	0	0	0	0	0	0	0	0	0	0	0	0	0	0	0	0		0	0						0	0	0	0	0	0
2016-11-30 19:20:20	400101749	1		1958-06-08	重庆大坪医院	胃结直肠外科	2016-08-24	-1	0	1	0	0	0	0	0	0	0	0	0	0	0	0	0	0	0	0	0	0	0	0	0	0	0	-1	0	0						0	0	0	0	0	0
2017-05-26 12:45:08	400102075	2		1956-08-09	重庆大坪医院	胃结直肠外科	2017-03-01	-1	0	1	0	0	0	0	0	0	0	0	0	0	0	0	0	0	1	0	0	0	0	0	0	0	0	4	0	0						0	0	0	0	0	0
2016-05-19 13:56:11	500700203	2		1948-06-12	邢台市人民医院	肿瘤内科	2013-11-25	-1	0	0	0	0	0	0	0	0	0	0	0	0	0	0	0	0	0	0	0	0	0	0	0	0	0		0	0						0	0	0	0	0	0
2014-07-04 17:02:58	1900100930	2		1963-11-15	中山大学第一附属医院	胃肠外科	2014-06-03		0	0	0	0	0	0	0	0	0	0	0	0	0	0	0	0	0	0	0	0	0	0	0	0	0	-1	0	0						0	0	0	0	0	0
2016-05-19 13:55:44	500700201	2		1952-02-12	邢台市人民医院	肿瘤内科	2014-01-09	-1	0	0	0	0	0	0	0	0	0	0	0	0	0	0	0	0	0	0	0	0	0	0	0	0	0		0	0						0	0	0	0	0	0
2019-11-11 13:05:26	800108903	2	1	1962-09-19	吉林大学白求恩第一医院	肿瘤中心	2019-02-21	-1	0	0	0	1	0	0	1	0	1	0	0	1	0	0	0	0	0	0	0	0	0	0	0	0	0	4	0	0						0	0	0	0	0	0
2016-05-19 13:57:01	500700206	2		1957-01-12	邢台市人民医院	肿瘤内科	2014-07-14	-1	0	0	0	0	0	0	0	0	0	0	0	0	0	0	0	0	0	0	0	0	0	0	0	0	0		0	0						0	0	0	0	0	0
2016-05-10 10:33:41	1300200739	1		1944-08-10	福建省肿瘤医院	干部保健特需病房	2014-12-29		0	0	0	0	0	0	0	0	0	0	0	0	0	0	0	0	0	0	0	0	0	0	0	0	0		0	0						0	0	0	0	1	7	1
2016-05-10 16:32:52	1300200857	1		1945-05-10	福建省肿瘤医院	七区 胃肠肿瘤外科	2015-03-25		0	0	0	0	0	0	0	0	0	0	0	0	0	0	0	0	0	0	0	0	0	0	0	0	0		0	0						0	0	0	0	0	0
2017-03-02 10:25:11	2400100223	1		1951-11-15	西京医院	胃肠外科	2016-05-27	-1	0	0	0	0	0	0	0	0	0	0	0	0	0	0	0	0	0	0	0	0	0	0	0	0	0	4	0	0						0	0	0	0	0	0
2016-05-10 10:31:58	1300200736	1		1958-12-22	福建省肿瘤医院	七区 胃肠肿瘤外科	2014-09-10		0	0	0	0	0	0	0	0	0	0	0	0	0	0	0	0	0	0	0	0	0	0	0	0	0		0	0						0	0	0	0	0	0
2016-01-11 15:07:52	400100889	2		1949-08-28	重庆大坪医院	消化科	2015-06-01		0	0	0	0	0	0	0	0	0	0	0	0	0	0	0	0	0	0	0	0	0	0	0	0	0		0	0						0	0	0	0	0	0
2015-08-04 12:23:50	800104110	1		1947-04-18	吉林大学白求恩第一医院	肿瘤中心	2015-06-05		0	0	0	0	0	0	0	0	0	1	0	0	0	0	0	0	0	0	0	0	0	0	0	0	0	-1	0	0						0	0	0	0	1	7	1
2016-06-24 08:57:28	1300201283	2		1970-02-10	福建省肿瘤医院	干部保健特需病房	2016-04-15		0	0	0	0	0	0	0	0	0	0	0	0	0	0	0	0	0	0	0	0	1	0	0	0	0		0	0						0	0	0	0	0	0
2016-12-19 11:26:14	1300201447	2	1	1954-07-12	福建省肿瘤医院	干部保健特需病房	2016-09-01		0	0	0	0	0	0	0	1	0	0	0	0	0	0	0	0	0	0	0	0	0	0	0	0	0		0	0						0	0	0	0	0	0
2016-05-09 10:05:51	1300200591	2		1990-08-29	福建省肿瘤医院	干部保健特需病房	2014-10-08		0	0	0	0	0	0	0	0	0	0	0	0	0	0	0	0	0	0	0	0	0	0	0	0	0		0	0						0	0	0	0	0	0
2015-04-17 20:25:29	800103582	2		1958-03-24	吉林大学白求恩第一医院	肿瘤中心	2015-04-05		0	0	0	0	0	0	0	1	0	0	0	0	0	0	0	0	0	0	0	0	0	0	0	0	0	-1	0	0						0	0	0	0	0	0
2017-05-27 08:35:52	1300201585	2		1967-12-10	福建省肿瘤医院	干部保健特需病房	2017-05-25		0	0	0	0	0	0	0	0	0	0	0	0	0	0	0	0	0	0	0	0	1	0	0	0	0	4	0	0						0	0	0	0	0	0
2016-03-14 18:59:50	400101173	1		1963-04-12	重庆大坪医院	胃结直肠外科	2016-01-04	-1	0	0	0	0	0	0	0	0	0	0	1	0	0	0	0	0	0	0	0	0	0	0	0	0	0	-1	0	0						0	0	0	0	0	0
2016-05-19 13:55:57	500700202	2		1974-03-06	邢台市人民医院	肿瘤内科	2014-01-07	-1	0	0	0	0	0	0	0	0	0	0	0	0	0	0	0	0	0	0	0	0	0	0	0	0	0		0	0						0	0	0	0	0	0
2016-05-19 13:53:26	500700193	2		1951-11-20	邢台市人民医院	肿瘤内科	2014-06-16	-1	0	0	0	0	0	0	0	0	0	0	0	0	0	0	0	0	0	0	0	0	0	0	0	0	0		0	0						0	0	0	0	0	0
2016-05-10 10:27:07	1300200730	2		1958-07-08	福建省肿瘤医院	干部保健特需病房	2014-12-11		0	0	0	0	0	0	0	0	0	0	0	0	0	0	0	0	0	0	0	0	0	0	0	0	0		0	0						0	0	0	0	1	7		1
2015-05-10 23:17:05	800103722	2		1960-01-01	吉林大学白求恩第一医院	胃肠外科	2015-01-24	-1	0	0	0	0	0	0	0	1	0	1	0	0	0	0	0	0	0	0	0	0	0	0	0	0	0	-1	0	0						0	0	0	0	0	0
2016-05-13 15:05:52	1300200003	1		1954-07-26	福建省肿瘤医院	干部保健特需病房	2013-11-29		0	0	0	0	0	0	1	1	0	0	0	0	0	0	0	0	0	0	0	0	0	0	0	0	0		0	0						0	0	0	0	0	0
2016-08-24 10:22:14	1300201381	2		1962-11-02	福建省肿瘤医院	干部保健特需病房	2016-08-16		0	0	0	0	0	0	0	0	1	0	0	0	0	0	0	0	0	0	0	0	0	0	0	0	0		0	0						0	0	0	0	0	0
2016-12-19 09:43:37	1300201442	1		1958-02-06	福建省肿瘤医院	干部保健特需病房	2016-09-27		0	0	0	0	0	0	0	0	0	0	0	0	0	0	0	0	0	0	0	0	1	0	0	0	0		0	0						0	0	0	0	0	0
2015-08-25 16:02:10	800104423	1		1955-11-25	吉林大学白求恩第一医院	肿瘤中心	2015-05-04		0	0	0	0	0	0	0	1	0	0	0	0	0	0	0	0	0	0	0	0	0	0	1	4	25	1	1	1	1					0	0	3	0	1	7	1
2014-12-26 15:58:21	500400051	1		1966-04-22	河北医科大学第二医院（东院）	普通外科	2014-09-04		0	0	0	0	0	0	0	1	0	0	0	0	0	0	0	0	0	0	0	0	0	0	1	3	30	2	0	0						0	0	0	0	1	14	1
2017-02-27 18:12:54	2400100200	1		1941-04-20	西京医院	胃肠外科	2016-06-18	-1	0	0	0	0	0	0	0	0	0	0	0	0	0	0	0	0	0	0	0	0	0	0	1	7	50	2	1	1	1					0	0	6	0	0	0
2019-07-19 15:13:57	400103609	1		1942-09-19	重庆大坪医院	胸外科	2019-02-10	-1	0	0	0	0	0	0	0	0	0	0	0	0	0	0	0	0	0	0	0	0	1	0	1	7	60	3	0	0						0	0	0	0	0	0
2014-06-06 23:15:23	800101678	2		1968-11-12	吉林大学白求恩第一医院	胃肠外科	2014-04-05		0	0	0	0	0	0	0	0	0	0	0	0	0	0	0	0	0	0	0	0	0	0	1	14	30	1	0	0						0	0	0	0	0	0
2015-05-20 13:05:49	800103735	1		1953-01-11	吉林大学白求恩第一医院	胃肠外科	2015-01-19	-1	0	0	0	0	0	0	0	0	0	1	0	0	0	0	0	0	0	0	0	0	0	0	1	7	30	1	1	7	1					0	0	21	0	0	0
2015-08-10 22:12:56	800104291	1		1951-05-23	吉林大学白求恩第一医院	胃肠外科	2015-04-09		0	0	0	0	0	0	0	0	0	0	0	0	0	0	0	0	0	0	0	0	0	1	1	7	45	1	1	3	1					0	0	70	0	1	7		1
2016-09-27 17:48:40	400101497	1		1964-08-01	重庆大坪医院	胃结直肠外科	2016-07-24		0	0	0	0	0	0	0	0	0	0	0	0	0	0	0	0	0	0	0	0	0	0	1	7	30	1	1	14	1					0	0	20	0	0	0
2017-02-04 17:53:09	2400100156	1		1990-12-16	西京医院	胃肠外科	2016-07-27	-1	0	0	0	0	0	0	0	1	0	0	0	0	0	0	0	0	0	0	0	0	0	1	1	15	33	2	0	0						0	0	0	0	0	0
2016-12-12 10:01:19	800105366	1		1947-11-18	吉林大学白求恩第一医院	胃肠外科	2015-08-20	-1	0	0	0	1	0	0	0	0	0	0	0	0	0	0	0	0	0	0	0	0	0	0	1	7	50	1	1	7	1					0	0	21	0	1	14
2018-10-05 12:20:32	2800400255	1		1949-01-10	广西医科大学一附院	胃肠腺体外科	2018-07-01	-1	0	0	0	0	0	0	0	0	0	0	0	0	0	0	0	0	0	0	0	0	0	0	1	1	15	3	0	0						0	0	0	0	0	0
2017-01-22 16:14:57	400300007	1		1956-12-14	重庆市肿瘤医院	胃肠外科	2017-01-11	-1	0	0	0	0	0	0	0	0	0	0	0	0	0	0	0	0	0	0	0	0	1	0	1	3	40	1	1	1	1					0	0	2	0	0	0
2016-05-18 15:35:02	500700067	1		1956-03-17	邢台市人民医院	肿瘤外科	2014-11-26	-1	0	0	0	0	0	0	0	0	0	0	0	0	0	0	0	0	0	0	0	0	0	1	1	1	20	2	1	7	1					0	0	7	0	1	7
2015-08-04 02:14:53	800104097	2		1965-10-15	吉林大学白求恩第一医院	胃肠外科	2015-05-23		0	0	0	0	0	0	0	0	0	0	0	0	0	0	0	0	0	0	0	0	0	0	1	7	29	1	0	0						0	0	0	0	0	0
2016-01-15 15:58:10	800105124	2		1950-01-10	吉林大学白求恩第一医院	胃肠外科	2015-07-23	-1	0	0	0	0	0	0	0	1	0	0	0	0	0	0	0	0	0	0	0	0	0	0	1	14	20	3	0	0						0	0	0	0	0	0
2016-05-10 16:28:10	1300200851	1		1949-10-22	福建省肿瘤医院	七区 胃肠肿瘤外科	2014-12-08		0	0	0	0	0	0	0	0	0	0	0	0	0	0	0	0	0	0	0	0	0	0	1	2	40	1	0	0						0	0	0	0	0	0
2014-04-01 16:27:17	1900100713	1		1947-11-20	中山大学第一附属医院	胃肠外科	2014-02-28	-1	0	0	1	0	0	0	1	1	1	0	0	0	0	0	0	0	0	0	0	0	0	0	1	14	35	1	0	0						0	0	0	0	1	21
2016-05-18 15:30:16	500700057	1		1946-07-13	邢台市人民医院	肿瘤内科	2014-07-09	-1	0	0	0	0	0	0	0	0	0	0	0	0	0	0	0	0	0	0	0	0	0	1	1	7	50	2	1	7	1					0	0	14	0	1	7	1	1
2016-05-19 13:49:19	500700179	1		1953-02-01	邢台市人民医院	肿瘤内科	2013-08-17	-1	0	0	0	0	0	0	0	1	0	0	0	0	0	0	0	0	0	0	0	0	0	0	1	3	15	2	0	0						0	0	0	0	0	0
2016-05-09 10:05:06	1300200590	1		1949-03-11	福建省肿瘤医院	三十一区 腹部肿瘤内科	2014-09-23		0	0	0	0	0	0	0	0	0	0	0	0	0	0	0	0	0	0	0	0	0	0	1	7	40	2	1	14	1					5	0	30	0	1	7	1
2017-11-17 15:54:48	1300201867	1		1959-02-26	福建省肿瘤医院	干部保健特需病房	2017-11-02		0	0	0	0	0	0	0	0	0	0	0	0	0	0	0	0	0	0	0	0	1	0	1	7	27	2	0	0						0	0	0	0	0	0
2016-05-10 16:16:49	1300200833	1		1963-02-14	福建省肿瘤医院	七区 胃肠肿瘤外科	2014-10-22		0	0	0	0	0	0	0	0	0	0	0	0	0	0	0	0	0	0	0	0	0	0	1	2	20	1	0	0						0	0	0	0	0	0
2016-05-05 10:10:40	1300200418	1		1964-08-16	福建省肿瘤医院	三十一区 腹部肿瘤内科	2014-06-16		0	0	0	0	0	0	0	0	0	0	0	0	0	0	0	0	0	0	0	0	0	0	1	7	35	1	1	7	1					0	0	70	0	1	7	1
2014-04-29 13:50:18	800101325	2		1954-06-27	吉林大学白求恩第一医院	胃肠外科	2014-03-04		0	0	0	0	0	0	0	0	0	0	0	0	0	0	0	0	0	0	0	0	0	0	1	7	30	1	0	0						0	0	0	0	1	14		1
2016-05-10 16:17:36	1300200835	1		1959-06-28	福建省肿瘤医院	七区 胃肠肿瘤外科	2015-03-16		0	0	0	0	0	0	0	0	0	0	0	0	0	0	0	0	0	0	0	0	0	0	1	2	30	1	1	7			1			28	0	0	0	0	0
2017-03-07 10:13:20	2400100263	2		1956-11-05	西京医院	胃肠外科	2017-01-09	-1	0	0	0	0	0	0	0	0	0	0	0	0	0	0	0	0	0	0	0	0	1	0	0	0	0	4	0	0						0	0	0	0	0	0
2017-03-06 09:30:35	400101929	1		1950-04-16	重庆大坪医院	心外科	2016-12-11	-1	0	0	0	0	0	0	0	0	0	0	0	0	0	0	0	0	0	0	0	0	1	0	0	0	0	4	0	0						0	0	0	0	0	0
2014-12-30 15:29:07	400100386	2		1975-11-05	重庆大坪医院	胃结直肠外科	2014-12-07	-1	0	0	0	0	0	0	0	0	0	0	0	0	0	0	0	0	0	0	0	0	0	0	0	0	0	-1	0	0						0	0	0	0	0	0
2016-05-16 15:59:01	800100110	2		1962-05-23	吉林大学白求恩第一医院	肿瘤中心	2013-07-02		0	0	0	0	0	0	0	0	0	0	0	0	0	0	0	0	0	0	0	0	0	0	0	0	0	-1	0	0						0	0	0	0	0	0
2014-09-24 09:22:25	2800100600	1		1963-10-15	广西医科大学附属肿瘤医院	胃肠二区	2014-08-26	-1	0	0	0	0	0	0	0	0	0	0	0	0	0	0	0	0	0	0	0	0	0	0	0	0	0	-1	0	0						0	0	0	0	0	0
2014-04-28 20:17:28	800101311	1		1950-06-14	吉林大学白求恩第一医院	胃肠外科	2014-03-03	-1	0	0	0	0	0	0	0	0	0	0	1	0	0	0	0	0	0	0	0	0	0	0	0	0	0	-1	0	0						0	0	0	0	0	0
2015-03-25 09:54:47	2100101169	2		1963-03-05	四川大学华西医院	肿瘤二	2014-10-10	-1	0	0	0	0	0	0	0	0	0	0	0	0	0	0	0	0	0	0	0	0	0	1	0	0	0		0	0						0	0	0	0	0	0
2015-01-06 20:21:16	500400041	1		1943-05-08	河北医科大学第二医院（东院）	消化内科	2013-11-11		0	0	0	0	0	0	1	0	0	0	0	0	0	0	1	0	0	0	0	0	0	0	0	0	0		0	0						0	0	0	0	0	0
2015-02-07 16:28:10	800103219	2		1966-03-26	吉林大学白求恩第一医院	肿瘤中心	2014-11-18	-1	0	0	0	0	0	0	0	0	0	0	0	0	0	0	0	0	0	0	0	0	0	0	0	0	0	-1	0	0						0	0	0	0	0	0
2016-05-10 16:05:55	1300200820	2		1954-10-02	福建省肿瘤医院	干部保健特需病房	2015-02-26		0	0	0	0	0	0	0	0	0	0	0	0	0	0	0	0	0	0	0	0	0	1	0	0	0		0	0						0	0	0	0	1	7		1
2019-03-25 14:41:50	2300102881	2	1	1950-12-31	昆明医科大学第一附属医院	肿瘤外科	2019-03-14	-1	0	0	0	0	0	0	1	1	1	0	0	0	0	0	0	0	0	0	0	0	0	1	0	0	0	4	0	0						0	0	0	0	0	0
2016-12-29 10:38:18	400101895	2	2	1955-08-29	重庆大坪医院	肿瘤科	2016-11-28	-1	0	0	0	0	0	0	0	0	0	0	0	0	0	0	0	0	0	0	0	0	1	0	0	0	0	-1	0	0						0	0	0	0	0	0
2018-03-23 10:18:40	1300202258	2		1973-04-02	福建省肿瘤医院	干部保健特需病房	2018-02-05	-1	0	0	0	0	0	0	0	0	0	0	0	0	0	0	0	0	0	0	0	0	1	0	0	0	0	4	0	0						0	0	0	0	0	0
2018-12-18 16:02:10	2300102588	1		1962-07-22	昆明医科大学第一附属医院	肿瘤外科	2018-12-05	-1	0	0	0	0	0	0	0	0	0	0	0	0	0	0	0	0	0	0	0	0	1	0	0	0	0	4	0	0						0	0	0	0	0	0
2018-05-24 22:01:31	2300101979	2	1	1949-12-12	昆明医科大学第一附属医院	肿瘤内科	2018-05-11	-1	0	0	0	0	0	0	0	1	0	0	0	0	0	0	0	0	0	0	0	0	0	0	0	0	0	4	0	0						0	0	0	0	1	7	1
2019-06-02 17:23:54	800108379	2	1	1964-03-24	吉林大学白求恩第一医院	肿瘤中心	2019-04-15	-1	0	0	0	0	0	0	0	0	0	1	0	0	0	0	0	0	0	0	0	0	0	0	0	0	0	4	0	0						0	0	0	0	0	0
2019-05-31 22:04:50	800108363	2		1972-10-27	吉林大学白求恩第一医院	肿瘤中心	2019-04-15	-1	0	0	0	0	0	0	0	0	0	0	0	0	0	0	0	0	0	0	0	0	1	0	0	0	0	4	0	0						0	0	0	0	0	0
2019-11-23 10:16:26	800109335	1		1975-09-10	吉林大学白求恩第一医院	肿瘤中心	2019-07-29	-1	0	0	0	0	0	0	0	0	0	0	0	0	0	0	0	0	0	0	0	0	1	0	0	0	0	4	0	0						0	0	0	0	0	0
2019-11-16 15:20:28	800109036	2		1972-12-22	吉林大学白求恩第一医院	肿瘤中心	2019-08-04	-1	0	0	0	0	0	0	0	0	0	1	0	0	0	0	0	0	0	0	0	0	0	0	0	0	0	4	0	0						0	0	0	0	0	0
2019-12-15 12:25:00	800109579	2	1	1965-11-22	吉林大学白求恩第一医院	肿瘤中心	2019-11-04	-1	0	0	0	0	0	0	0	0	0	0	0	0	0	0	0	0	0	0	0	0	1	0	0	0	0	4	0	0						0	0	0	0	1	14	1
2016-07-11 16:28:55	1300201340	1		1951-08-18	福建省肿瘤医院	干部保健特需病房	2016-06-15		0	1	0	0	0	0	0	0	0	0	0	0	0	0	0	0	1	0	0	0	0	0	0	0	0		0	0						0	0	0	0	0	0
2019-01-10 19:36:19	400103202	1		1951-05-23	重庆大坪医院	胃结直肠外科	2018-10-07	-1	0	0	0	1	0	0	0	0	0	0	0	0	0	0	0	0	0	0	0	0	0	0	0	0	0	4	0	0						0	0	0	0	0	0
2017-03-03 16:32:47	2400100249	2	1	1944-04-08	西京医院	胃肠外科	2016-10-08	-1	0	0	0	0	0	0	0	0	0	0	0	0	0	0	0	0	0	0	0	0	1	1	0	0	0	4	0	0						0	0	0	0	0	0
2014-02-26 13:24:59	800100405	1		1962-10-19	吉林大学白求恩第一医院	肿瘤中心	2013-10-08		0	0	0	0	0	0	0	0	0	0	0	0	0	0	0	0	1	0	0	0	0	1	0	0	0	-1	0	0						0	0	0	0	0	0
2016-10-09 09:47:02	1300201397	1		1956-01-22	福建省肿瘤医院	干部保健特需病房	2016-09-06		0	0	0	0	0	0	0	0	0	0	0	0	0	0	0	0	0	0	0	0	1	0	0	0	0		0	0						0	0	0	0	0	0
2015-06-11 15:39:49	400100585	1		1951-04-15	重庆大坪医院	胸外科	2015-03-31		0	0	0	0	0	0	0	0	0	0	0	0	0	0	0	0	0	0	0	0	0	0	0	0	0	-1	0	0						0	0	0	0	0	0
2016-05-05 16:47:17	1200100182	1		1955-10-07	安徽省肿瘤医院	放三	2015-02-26	-1	0	0	0	0	0	0	0	0	0	0	0	0	0	0	0	0	0	0	0	0	0	0	0	0	0		0	0						0	0	0	0	0	0
2014-12-30 18:13:39	400100317	2		1940-01-23	重庆大坪医院	肿瘤科	2014-12-11		0	0	0	0	0	0	0	0	0	0	0	0	0	0	0	0	0	0	0	0	0	0	0	0	0	-1	0	0						0	0	0	0	0	0
2015-10-30 16:38:31	2400100093	2		1978-11-29	西京医院	胃肠外科	2015-10-15	-1	0	0	0	0	0	0	0	0	0	0	0	0	0	0	0	0	0	0	0	0	0	0	0	0	0	-1	0	0						0	0	0	0	0	0
2016-05-13 15:16:09	1300200067	1		1955-09-21	福建省肿瘤医院	干部保健特需病房	2014-02-10		0	1	0	0	0	0	1	0	0	0	0	0	0	0	0	0	0	0	0	0	0	0	0	0	0		0	0						0	0	0	0	0	0
2016-05-13 15:06:20	1300200006	1		1983-11-10	福建省肿瘤医院	干部保健特需病房	2013-12-13		0	0	0	0	0	0	0	0	0	0	0	0	0	0	0	0	0	0	0	0	0	0	0	0	0		1	2			1			3	0	0	0	0	0
2014-01-17 21:50:04	2800100081	1		1979-10-07	广西医科大学附属肿瘤医院	胃肠一区	2013-05-08	-1	0	0	0	0	0	0	0	0	0	0	0	0	0	0	0	0	0	0	0	0	0	0	0	0	0	-1	0	0						0	0	0	0	1	4
2016-07-21 10:28:14	1300201348	2	2	1957-08-25	福建省肿瘤医院	干部保健特需病房	2016-07-12		0	0	0	0	0	0	0	0	0	0	0	0	0	0	0	0	1	0	0	0	0	0	0	0	0		0	0						0	0	0	0	0	0
2016-07-11 11:33:34	1300201336	2	1	1963-05-04	福建省肿瘤医院	干部保健特需病房	2016-06-20		0	0	0	0	0	0	0	0	0	0	0	0	0	0	0	0	0	0	0	0	1	0	0	0	0		0	0						0	0	0	0	0	0
2015-04-27 14:44:02	800103656	1		1966-06-14	吉林大学白求恩第一医院	肿瘤中心	2015-01-18		0	0	0	0	0	0	0	0	0	0	0	0	0	0	0	0	0	0	0	0	0	0	0	0	0	-1	0	0						0	0	0	0	0	0
2019-12-16 17:10:33	800109613	2		1979-06-14	吉林大学白求恩第一医院	肿瘤中心	2019-07-07	-1	0	0	0	0	0	0	0	0	0	0	0	0	0	0	0	0	1	0	0	0	0	0	0	0	0	4	0	0						0	0	0	0	0	0
2014-02-26 13:13:03	800100398	1		1950-12-29	吉林大学白求恩第一医院	肿瘤中心	2013-12-05		0	0	0	0	0	0	0	0	0	0	0	0	0	0	0	0	0	0	0	0	0	0	0	0	0	-1	1	2	1					0	0	6	0	0	0
2019-12-24 15:53:35	800109822	2		1983-06-18	吉林大学白求恩第一医院	肿瘤中心	2019-11-18	-1	0	0	0	0	0	0	0	0	0	0	0	0	0	0	0	0	0	0	0	0	1	0	0	0	0	4	0	0						0	0	0	0	0	0
2016-12-16 11:04:13	1300201439	1		1962-09-24	福建省肿瘤医院	十四区 腹部肿瘤放疗科	2016-08-26		0	0	0	0	0	0	0	0	0	0	0	0	0	0	0	0	0	0	0	0	1	1	0	0	0		0	0						0	0	0	0	0	0
2018-09-02 14:21:55	100900399	1		1962-11-14	首都医科大学附属北京世纪坛医院	胃肠外科	2018-08-27	-1	0	0	0	0	0	0	1	0	0	0	0	0	0	0	0	0	0	0	0	0	0	1	0	0	0	4	0	0						0	0	0	0	1	7		1
2017-01-20 09:41:15	1300201484	2		1970-01-20	福建省肿瘤医院	干部保健特需病房	2017-01-11		0	0	0	0	0	0	0	0	0	0	0	0	0	0	0	0	0	0	0	0	1	0	0	0	0		0	0						0	0	0	0	0	0
2013-09-17 16:04:59	1900100188	1		1959-05-12	中山大学第一附属医院	胃肠外科	2013-05-27		0	0	0	0	0	0	0	0	0	1	0	0	0	0	0	0	0	0	0	0	0	0	0	0	0	-1	0	0						0	0	0	0	0	0
2016-05-14 10:37:31	800103392	1		1967-09-28	吉林大学白求恩第一医院	胃肠外科	2014-09-18	-1	0	0	0	0	0	0	0	0	0	0	0	0	0	0	0	0	0	0	0	0	0	0	0	0	0	-1	1	14	1					0	0	42	0	0	0
2020-12-24 21:27:13	2300104209	2	1	1964-10-03	昆明医科大学第一附属医院	普外一科（胃肠与疝外科）	2020-11-10	-1	0	0	0	0	0	0	0	0	0	0	0	0	0	0	0	0	0	0	0	0	1	0	0	0	0	4	0	0						0	0	0	0	0	0
2018-10-16 15:59:33	1300202530	1		1948-11-21	福建省肿瘤医院	干部保健特需病房	2018-06-30	-1	0	0	0	0	0	0	0	0	0	0	0	0	0	0	0	0	0	0	0	0	1	0	1	7	20	2	0	0						0	0	0	0	1	14	1
2014-03-16 18:14:25	800101047	2		1940-09-14	吉林大学白求恩第一医院	肿瘤中心	2014-02-25		0	0	0	0	0	0	0	0	0	0	0	0	0	0	0	0	0	0	0	0	0	1	1	3	15	3	0	0						0	0	0	0	0	0
2014-02-25 16:26:14	800100290	2		1960-01-07	吉林大学白求恩第一医院	肿瘤中心	2013-12-01	-1	0	0	0	0	0	0	0	0	0	0	0	0	0	0	0	0	0	0	0	0	0	0	1	10	30	1	0	0						0	0	0	0	0	0
2015-08-06 19:41:00	800104196	1		1959-12-29	吉林大学白求恩第一医院	肿瘤中心	2015-07-17		0	0	0	0	0	0	0	0	0	0	0	0	0	0	0	0	1	0	0	0	0	0	1	10	30	1	0	0						0	0	0	0	0	0
2014-01-23 09:43:42	800100030	1		1962-03-07	吉林大学白求恩第一医院	肿瘤中心	2013-11-25	-1	0	1	0	0	0	0	0	0	0	0	0	0	0	0	0	0	0	0	0	0	0	1	1	7	10	2	0	0						0	0	0	0	0	0
2016-05-06 11:03:34	2800300093	1		1975-06-23	广西壮族自治区人民医院	放疗病区	2014-10-24	-1	0	0	0	0	0	0	0	0	0	1	0	0	0	0	0	0	0	0	0	0	0	0	1	7	20	2	0	0						0	0	0	0	0	0
2014-03-14 18:35:01	800101009	1		1980-08-11	吉林大学白求恩第一医院	肿瘤中心	2014-02-18		0	0	0	0	0	0	0	0	0	0	0	0	0	0	0	0	0	0	0	0	0	0	1	7	15	1	0	0						0	0	0	0	0	0
2015-03-11 15:53:14	300100178	1		1954-12-21	上海瑞金医院	外科三病区	2014-12-22	-1	0	0	0	0	0	0	0	0	0	0	0	0	0	0	0	0	0	0	0	0	0	0	1	7	40		0	0						0	0	0	0	1	14	1
2014-09-09 16:23:19	800102560	1		1971-07-25	吉林大学白求恩第一医院	胃肠外科	2014-05-15	-1	0	0	0	0	0	0	0	0	0	0	0	0	0	0	0	0	0	0	0	0	0	0	1	7	25	1	1	20	1					0	0	80	0	0	0
2014-12-27 09:55:05	800102948	1		1957-03-24	吉林大学白求恩第一医院	肿瘤中心	2014-10-29		0	0	0	0	0	0	0	0	0	0	0	0	0	0	1	0	0	0	0	0	0	0	1	7	30	1	0	0						0	0	0	0	0	0
2015-04-17 22:37:43	800103595	1		1958-02-05	吉林大学白求恩第一医院	胃肠外科	2014-10-22	-1	0	0	0	0	0	0	0	0	0	0	0	0	0	0	0	0	0	0	0	0	0	0	1	14	39	1	1	2	1					0	0	4	0	0	0
2014-02-26 15:45:27	800100455	2		1949-11-22	吉林大学白求恩第一医院	肿瘤中心	2013-12-25		0	0	0	0	0	0	0	0	0	0	0	0	0	0	0	0	0	0	0	0	0	0	1	7	30	1	0	0						0	0	0	0	0	0
2014-07-29 16:24:31	1900101009	1		1983-06-07	中山大学第一附属医院	胃肠外科	2014-07-11		0	0	0	0	0	0	0	0	0	1	0	0	0	0	0	0	0	0	0	0	0	0	1	4	13	1	0	0						0	0	0	0	0	0
2016-05-13 15:05:43	1300200002	1		1962-08-13	福建省肿瘤医院	干部保健特需病房	2013-11-25		0	0	0	0	0	0	0	0	0	0	0	0	0	0	0	0	0	0	0	0	0	0	1	10	3	2	1	7			1			5	0	0	0	1	3		1
2017-01-19 17:29:55	2400100100	1		1960-04-15	西京医院	胃肠外科	2016-09-10	-1	0	0	1	0	0	0	0	0	0	0	0	0	0	0	0	0	0	0	0	0	0	0	1	14	35	2	0	0						0	0	0	0	0	0
2014-02-26 12:52:04	800100387	1		1967-08-07	吉林大学白求恩第一医院	肿瘤中心	2013-11-26		0	0	0	0	0	0	0	0	0	0	0	0	0	0	0	0	0	0	0	0	0	0	1	7	30	1	1	7	1					0	0	21	0	0	0
2014-04-18 11:23:34	800101209	1		1954-03-30	吉林大学白求恩第一医院	胃肠外科	2014-02-22		0	0	0	0	0	0	0	1	0	0	0	0	0	0	0	0	0	0	0	0	0	0	1	7	30	1	1	5	1					0	0	10	0	0	0
2018-06-15 15:07:21	1300202368	1		1961-10-25	福建省肿瘤医院	干部保健特需病房	2018-06-13	-1	0	0	0	0	0	0	0	0	0	0	0	0	0	0	0	0	0	0	0	0	1	0	1	7	27	3	0	0						0	0	0	0	0	0
2016-05-13 15:29:26	1300200165	1		1954-05-14	福建省肿瘤医院	干部保健特需病房	2014-05-19		0	0	0	0	0	0	0	0	0	0	0	0	0	0	0	0	0	0	0	0	0	0	1	7	45	2	0	0						0	0	0	0	0	0
2018-06-08 17:45:32	800106572	1		1960-10-26	吉林大学白求恩第一医院	肿瘤中心	2017-07-31	-1	0	0	0	0	0	0	0	0	0	0	0	0	0	0	0	0	0	0	0	0	1	0	1	7	40	2	1	7	1					0	0	35	0	1	3		1
2018-03-13 11:27:56	800106497	1		1950-04-24	吉林大学白求恩第一医院	肿瘤中心	2017-07-31		0	0	0	0	0	0	0	0	0	0	0	0	0	0	0	0	0	0	0	0	1	0	1	7	35	2	0	0						0	0	0	0	0	0
2019-04-01 13:37:35	800108198	1		1958-12-08	吉林大学白求恩第一医院	肿瘤中心	2018-12-21	-1	0	0	0	0	0	0	0	0	0	0	0	0	0	0	0	0	0	0	0	0	1	0	1	7	30	2	0	0						0	0	0	0	0	0
2018-08-14 15:06:59	100900385	1		1990-01-26	首都医科大学附属北京世纪坛医院	胃肠外科	2018-04-26	-1	0	0	0	0	0	0	0	0	0	0	0	0	0	0	0	0	0	0	0	0	1	0	1	7	10	2	0	0						0	0	0	0	0	0
2019-06-05 21:12:25	800108414	1		1963-08-23	吉林大学白求恩第一医院	肿瘤中心	2019-04-01	-1	0	0	0	0	0	0	0	0	0	0	0	0	0	0	0	0	1	0	0	0	0	0	1	7	40	1	1	10	1		1			20	0	20	0	1	7	1
2018-12-29 18:56:59	800107502	1		1965-10-02	吉林大学白求恩第一医院	肿瘤中心	2018-12-03	-1	0	0	0	0	0	0	0	0	0	0	0	0	0	0	0	0	0	0	0	0	1	0	1	4	25	2	0	0						0	0	0	0	0	0
2019-11-11 13:52:17	800108905	1		1956-02-01	吉林大学白求恩第一医院	肿瘤中心	2019-01-15	-1	0	0	0	0	0	0	0	0	0	1	0	0	0	0	0	0	0	0	0	0	0	0	1	5	40	2	0	0						0	0	0	0	1	7	1
2019-12-16 16:27:45	800109609	1		1957-08-17	吉林大学白求恩第一医院	肿瘤中心	2019-10-21	-1	0	0	0	0	0	0	0	0	0	0	0	0	0	0	0	0	0	0	0	0	1	0	1	10	40	2	1	2	1					0	0	10	0	0	0
2019-06-19 15:16:50	400103545	1		1954-07-11	重庆大坪医院	胸外科	2018-12-21	-1	0	0	0	0	0	0	0	0	0	0	0	0	0	0	0	0	0	0	0	0	1	0	1	4	40	2	1	7	1					0	0	4	0	0	0
2019-12-20 21:34:57	800109725	2	1	1966-02-04	吉林大学白求恩第一医院	肿瘤中心	2019-10-24	-1	0	0	0	0	0	0	0	0	0	0	0	0	0	0	0	0	0	0	0	0	1	0	1	10	30	1	1	7	1		1			0	0	14	0	1	7	1
2019-11-19 21:17:07	800109148	1		1951-12-01	吉林大学白求恩第一医院	肿瘤中心	2019-07-30	-1	0	0	0	0	0	0	0	0	0	0	0	0	0	0	0	0	0	0	0	0	1	0	1	4	25	3	0	0						0	0	0	0	0	0
2016-05-05 10:02:36	1300200405	1		1943-12-27	福建省肿瘤医院	干部保健特需病房	2014-06-19		0	0	0	0	0	0	0	0	0	0	0	0	0	0	0	0	0	0	0	0	0	0	1	7	15	3	0	0						0	0	0	0	0	0
2016-11-30 18:38:26	400101743	1		1977-06-20	重庆大坪医院	肿瘤科	2016-09-24	-1	0	0	0	0	0	0	0	0	0	0	0	0	0	0	0	0	0	0	0	0	1	0	1	7	20	2	1	7	1		1			40	0	0	0	0	0
2014-10-15 12:41:28	1200100060	1		1954-12-15	安徽省肿瘤医院	肿三	2014-04-10	-1	0	0	0	0	0	0	0	0	0	0	0	0	0	0	0	0	0	0	0	0	0	1	1	7	4	2	1	7	1					0	0	7	0	1	14	1
2015-03-12 20:11:50	1200100124	1		1949-11-02	安徽省肿瘤医院	肿四	2015-03-07	-1	0	0	0	0	0	0	0	1	0	0	0	0	0	0	0	0	0	0	0	0	0	0	1	14	40	2	1	7	1					0	0	35	0	1	7	1
2016-05-19 13:51:52	500700188	1		1947-12-23	邢台市人民医院	肿瘤内科	2014-08-12	-1	0	0	0	0	0	0	0	0	0	0	0	0	0	0	0	0	0	0	0	0	0	0	1	4	40	2	0	0						0	0	0	0	0	0
2016-05-05 10:08:42	1300200415	1		1947-08-27	福建省肿瘤医院	三十一区 腹部肿瘤内科	2014-05-28		0	0	0	0	0	0	0	0	0	0	0	0	0	0	0	0	0	0	0	0	0	0	1	14	40	3	1	7			1			20	0	0	0	1	7	1
2015-01-07 19:50:37	800103081	1		1966-01-05	吉林大学白求恩第一医院	胃肠外科	2014-07-26	-1	0	0	0	0	0	0	0	0	0	0	0	0	0	0	0	0	0	0	0	0	0	0	1	7	20	1	1	7	1					0	0	20	0	0	0
2014-01-24 18:44:22	2800100278	1		1965-05-24	广西医科大学附属肿瘤医院	胃肠二区	2013-11-13	-1	0	0	0	0	0	0	0	0	0	0	0	0	0	0	0	0	0	0	0	0	0	0	1	1	30	2	0	0						0	0	0	0	0	0
2017-12-13 10:41:35	100900109	1		1966-04-20	首都医科大学附属北京世纪坛医院	胃肠外科	2017-10-14	-1	0	0	0	0	0	0	0	0	0	0	0	0	0	0	0	0	0	0	0	0	1	0	1	4	30	3	1	4	1		1			5	0	10	0	1	14
2016-05-06 10:34:32	1300200466	1		1956-04-18	福建省肿瘤医院	干部保健特需病房	2014-07-15		0	0	0	0	0	0	0	0	0	0	0	0	0	0	0	0	0	0	0	0	0	0	1	7	35	1	1	7	1					0	0	14	0	1	7		1
2015-08-03 01:59:53	800104046	1		1955-06-07	吉林大学白求恩第一医院	胃肠外科	2015-05-15		0	0	0	0	0	0	0	0	0	0	0	0	0	0	0	0	0	0	0	0	0	0	1	17	40	1	0	0						0	0	0	0	0	0
2017-07-20 17:53:19	400102178	1		1953-09-12	重庆大坪医院	肿瘤科	2017-07-20	-1	0	0	0	0	0	0	0	0	0	0	0	0	0	0	0	0	0	0	0	0	1	1	1	9	30	1	0	0						0	0	0	0	0	0
2016-12-19 10:37:48	1300201444	1		1946-11-28	福建省肿瘤医院	干部保健特需病房	2016-10-08		0	0	0	0	0	0	0	0	0	1	0	0	0	0	0	0	0	0	0	0	0	0	1	1	30	3	1	5			1			7	0	0	0	0	0
2015-03-01 21:02:59	1200100094	1		1971-03-03	安徽省肿瘤医院	肿三	2015-02-25	-1	0	1	0	0	0	0	0	0	0	0	0	0	0	0	0	0	0	0	0	0	0	1	1	14	10	3	1	1	1					0	0	8	0	0	0
2018-03-02 09:14:45	400300181	1		1968-10-11	重庆市肿瘤医院	肿瘤内科	2018-02-26	-1	0	1	0	0	0	0	0	0	0	0	0	0	0	0	0	0	0	0	0	0	0	0	1	7	20	3	0	0						0	0	0	0	0	0
2016-05-11 10:04:32	1300200930	1		1966-08-28	福建省肿瘤医院	干部保健特需病房	2015-06-16		0	0	0	0	0	0	0	0	0	0	0	0	0	0	0	0	0	0	0	0	0	0	1	10	32	2	0	0						0	0	0	0	0	0
2014-05-21 22:30:36	800101472	1		1954-09-03	吉林大学白求恩第一医院	胃肠外科	2014-03-17		0	0	0	0	0	0	0	1	0	0	0	0	0	0	0	0	0	0	0	0	0	0	1	3	40	1	0	0						0	0	0	0	0	0
2016-06-21 17:20:31	1300201278	1		1969-12-26	福建省肿瘤医院	干部保健特需病房	2016-04-11		0	0	0	0	0	0	0	0	0	0	0	0	0	0	0	0	0	0	0	0	1	0	1	7	30	2	0	0						0	0	0	0	1	7	1
2019-11-24 10:49:37	800109373	1		1974-12-06	吉林大学白求恩第一医院	肿瘤中心	2019-05-16	-1	0	0	0	0	0	0	0	0	0	0	0	0	0	0	0	0	0	0	0	0	1	1	1	2	20	3	0	0						0	0	0	0	1	2		1
2016-09-20 18:14:40	400101495	1		1953-12-25	重庆大坪医院	肿瘤科	2016-07-21		0	0	0	0	0	0	0	0	0	0	0	0	0	0	0	0	0	0	0	0	0	0	1	7	30	2	1	7	1					0	0	14	0	0	0
2019-04-30 16:50:42	400103436	1		1971-09-18	重庆大坪医院	胃结直肠外科	2019-03-13	-1	0	0	0	0	0	0	0	0	0	0	0	0	0	0	0	0	0	0	0	0	1	1	1	3	20	1	1	14	1					0	0	14	0	0	0
2014-12-30 15:42:26	400100402	1		1956-04-08	重庆大坪医院	胃结直肠外科	2014-12-16		0	0	0	0	0	0	0	0	0	1	0	0	0	0	0	0	0	0	0	0	0	0	1	10	30	3	0	0						0	0	0	0	0	0
2014-08-21 09:50:18	2100100223	2		1954-12-12	四川大学华西医院	肿瘤一	2014-06-16	-1	0	0	0	0	0	0	0	1	0	0	0	0	0	0	0	0	0	0	0	0	0	1	0	0	0		0	0						0	0	0	0	0	0
2014-11-04 15:40:33	1900500294	2		1960-11-06	广东省人民医院	普外一病区	2013-05-01	-1	0	0	0	0	0	0	0	0	0	0	0	0	0	0	0	0	0	0	0	0	0	0	0	0	0	-1	0	0						0	0	0	0	0	0
2015-04-17 20:01:37	800103578	2		1954-09-20	吉林大学白求恩第一医院	肿瘤中心	2014-01-21	-1	0	0	0	0	0	0	0	0	0	0	0	0	0	0	0	0	0	0	0	0	0	0	0	0	0	-1	0	0						0	0	0	0	0	0
2014-08-04 15:08:39	2100100190	1		1946-08-03	四川大学华西医院	肿瘤三	2014-03-17	-1	0	0	0	0	0	0	0	1	0	0	0	0	0	0	0	0	0	0	0	0	0	0	0	0	0		0	0						0	0	0	0	0	0
2017-04-17 03:54:08	2800101619	2		1976-08-01	广西医科大学附属肿瘤医院	胃肠二区	2017-04-08	-1	0	0	0	0	0	0	0	0	0	0	0	0	0	0	0	0	0	0	0	0	0	0	0	0	0	4	0	0						0	0	0	0	0	0
2017-01-23 10:07:29	2400100123	1		1946-03-01	西京医院	胃肠外科	2016-09-06	-1	0	0	0	0	0	0	0	0	0	0	0	0	0	0	0	0	0	0	0	0	1	0	0	0	0	-1	0	0						0	0	0	0	0	0
2017-04-14 17:47:30	2800101587	1		1956-09-29	广西医科大学附属肿瘤医院	胃肠二区	2017-04-06	-1	0	0	0	0	0	0	0	0	0	0	0	0	0	0	0	0	0	0	0	0	1	0	0	0	0	4	1	7	1					0	0	5	0	0	0
2018-03-21 08:35:44	1300202238	2	1	1962-06-15	福建省肿瘤医院	三十一区 腹部肿瘤内科	2018-02-26	-1	0	0	0	0	0	0	0	0	0	0	0	0	0	0	0	0	0	0	0	0	1	0	0	0	0	4	0	0						0	0	0	0	1	7	1	1
2017-03-28 16:53:24	1300201531	2		1967-02-15	福建省肿瘤医院	干部保健特需病房	2017-03-20		0	1	0	0	0	0	0	0	0	0	0	0	0	0	0	0	0	0	0	0	0	0	0	0	0	4	0	0						0	0	0	0	0	0
2014-08-10 15:17:15	800102355	2		1944-02-23	吉林大学白求恩第一医院	肿瘤中心	2014-06-10		0	0	1	0	0	0	0	0	0	1	0	0	0	0	0	0	0	0	0	0	0	0	0	0	0	-1	0	0						0	0	0	0	0	0
2017-10-20 09:34:03	800106007	2	1	1956-07-11	吉林大学白求恩第一医院	肿瘤中心	2017-05-22	-1	0	0	0	0	0	0	0	0	0	0	0	0	0	1	0	0	0	0	0	0	0	1	0	0	0	4	0	0						0	0	0	0	0	0
2017-09-04 11:39:12	1300201727	2	1	1957-08-14	福建省肿瘤医院	七区 胃肠肿瘤外科	2017-08-17	-1	0	0	0	0	0	0	0	0	0	0	1	0	0	0	0	0	0	0	0	0	0	0	0	0	0	4	0	0						0	0	0	0	0	0
2018-06-15 15:51:46	1300202371	2	1	1947-10-03	福建省肿瘤医院	干部保健特需病房	2018-06-04	-1	0	0	0	0	0	0	0	0	0	0	0	0	0	0	0	0	0	0	0	0	1	0	0	0	0	4	0	0						0	0	0	0	0	0
2018-07-13 11:33:52	1300202399	1		1948-08-29	福建省肿瘤医院	干部保健特需病房	2018-07-04	-1	0	0	0	0	0	0	0	0	0	0	0	0	0	0	0	0	0	0	0	0	1	0	0	0	0	4	0	0						0	0	0	0	0	0
2019-12-19 17:37:20	800109667	2	1	1952-05-09	吉林大学白求恩第一医院	肿瘤中心	2019-11-07	-1	0	0	0	0	0	0	0	0	0	0	0	0	0	0	0	0	0	0	1	0	0	0	0	0	0	4	0	0						0	0	0	0	0	0
2015-08-04 02:04:49	800104096	2		1965-10-02	吉林大学白求恩第一医院	胃肠外科	2015-05-22	-1	0	0	0	0	0	0	0	0	0	0	0	0	0	0	0	0	0	0	0	0	0	0	0	0	0	-1	0	0						0	0	0	0	0	0
2018-08-03 09:16:45	1300202431	1		1957-01-09	福建省肿瘤医院	干部保健特需病房	2018-07-16	-1	0	0	0	0	0	0	0	0	0	0	0	0	0	0	0	0	0	0	0	0	1	0	0	0	0	4	0	0						0	0	0	0	0	0
2021-03-19 17:49:55	2300104363	2	1	1964-12-01	昆明医科大学第一附属医院	普外一科（胃肠与疝外科）	2021-03-18	-1	0	0	0	0	0	0	0	0	0	0	0	0	0	0	0	0	0	0	0	0	1	0	0	0	0	4	0	0						0	0	0	0	0	0
2016-07-31 10:29:03	1200100977	2		1950-10-15	安徽省肿瘤医院	肿三	2016-07-06	-1	0	0	0	0	0	0	0	0	0	0	0	0	0	0	0	0	0	0	0	0	0	0	0	0	0		0	0						0	0	0	0	0	0
2014-02-26 10:47:03	800100348	2		1946-01-03	吉林大学白求恩第一医院	肿瘤中心	2013-11-26		0	0	0	0	0	0	1	0	1	0	0	0	0	0	0	0	0	0	0	0	0	0	0	0	0	-1	0	0						0	0	0	0	0	0
2015-10-05 11:47:02	400200192	2		1965-08-18	重庆市第三人民医院	普外科	2015-06-18	-1	0	0	0	0	0	0	0	0	0	0	0	0	0	0	0	0	0	0	0	0	0	1	0	0	0	-1	0	0						0	0	0	0	0	0
2016-05-19 14:02:00	500700209	2		1948-10-06	邢台市人民医院	肿瘤内科	2013-06-04	-1	0	0	0	0	0	0	0	0	0	0	0	0	0	0	0	0	0	0	0	0	0	0	0	0	0		0	0						0	0	0	0	0	0
2018-05-17 10:14:57	800106545	1		1985-04-20	吉林大学白求恩第一医院	肿瘤中心	2017-08-08	-1	0	0	0	0	0	0	0	0	0	0	0	0	0	0	0	0	0	0	0	0	1	0	0	0	0	4	0	0						0	0	0	0	0	0
2016-05-13 15:13:20	1300200052	1		1948-03-07	福建省肿瘤医院	七区 胃肠肿瘤外科	2014-01-21		0	0	0	0	0	0	0	1	0	0	0	0	0	0	0	0	0	0	0	0	0	0	0	0	0		0	0						0	0	0	0	0	0
2017-04-18 17:27:23	2800101635	2		1970-07-25	广西医科大学附属肿瘤医院	胃肠二区	2017-03-12	-1	0	0	0	0	0	0	0	0	0	0	0	0	0	0	0	0	0	0	0	0	1	0	0	0	0	4	0	0						0	0	0	0	0	0
2016-05-16 15:40:58	1900101308	2		1969-05-20	中山大学第一附属医院	胃肠外科	2015-03-18		0	0	0	0	0	0	0	0	0	0	0	0	0	0	0	0	0	0	0	0	0	1	0	0	0		0	0						0	0	0	0	1	7
2018-10-16 11:21:42	1300202521	1		1947-08-26	福建省肿瘤医院	干部保健特需病房	2018-10-08	-1	0	0	0	0	0	0	0	0	0	0	0	0	0	0	0	0	0	0	0	0	1	1	0	0	0	4	0	0						0	0	0	0	0	0
2017-03-11 16:10:03	800105700	2	1	1947-04-06	吉林大学白求恩第一医院	胃肠外科	2015-09-06		0	0	0	0	0	0	0	0	1	1	0	0	0	0	0	0	0	0	0	0	0	0	0	0	0	4	0	0						0	0	0	0	0	0
2018-04-02 11:41:17	1300202263	1		1979-04-18	福建省肿瘤医院	三十一区 腹部肿瘤内科	2018-02-22	-1	0	0	0	0	0	0	0	0	0	0	1	0	0	0	0	0	0	0	0	0	0	0	0	0	0	4	0	0						0	0	0	0	0	0
2016-05-10 10:20:18	1300200719	2		1950-02-02	福建省肿瘤医院	三十一区 腹部肿瘤内科	2014-09-26		0	0	0	0	0	0	0	0	0	0	0	0	0	0	0	0	0	0	0	0	0	0	0	0	0		0	0						0	0	0	0	1	7		1
2018-08-14 14:51:59	100900384	2	2	1950-04-21	首都医科大学附属北京世纪坛医院	结直肠肿瘤外科	2018-07-02	-1	0	0	0	0	0	0	0	0	0	0	0	0	0	0	0	0	0	0	0	0	1	0	0	0	0	4	0	0						0	0	0	0	0	0
2018-12-30 17:15:20	800107624	1		1959-12-09	吉林大学白求恩第一医院	肿瘤中心	2018-08-02	-1	0	0	0	0	0	0	1	0	0	0	0	0	0	0	0	0	0	0	0	0	0	0	0	0	0	4	0	0						0	0	0	0	0	0
2019-11-22 20:56:20	800109329	2	1	1953-08-27	吉林大学白求恩第一医院	肿瘤中心	2018-07-11	-1	0	0	0	0	0	0	1	0	0	0	0	0	0	0	0	0	1	0	0	0	0	0	0	0	0	4	0	0						0	0	0	0	0	0
2016-05-13 14:58:58	1300201187	2		1967-02-16	福建省肿瘤医院	干部保健特需病房	2016-02-01		0	0	0	0	0	0	0	0	0	0	0	0	0	0	0	0	0	0	0	0	0	0	0	0	0		0	0						0	0	0	0	0	0
2016-05-19 13:54:13	500700196	2		1958-11-14	邢台市人民医院	肿瘤内科	2014-07-21	-1	0	0	0	0	0	0	0	0	1	0	0	0	0	0	0	0	0	0	0	0	0	0	0	0	0		0	0						0	0	0	0	0	0
2016-05-03 12:07:17	1300200314	2		1976-08-12	福建省肿瘤医院	三十一区 腹部肿瘤内科	2014-05-28		0	0	0	0	0	0	0	0	0	0	0	0	0	0	0	0	0	0	0	0	0	1	0	0	0		0	0						0	0	0	0	0	0
2016-05-06 15:46:46	1300200561	2		1967-05-26	福建省肿瘤医院	三十一区 腹部肿瘤内科	2014-07-30		0	0	0	0	0	0	0	1	0	0	0	0	0	0	0	0	0	0	0	0	0	0	0	0	0		0	0						0	0	0	0	0	0
2014-02-26 14:51:32	800100444	1		1957-09-27	吉林大学白求恩第一医院	肿瘤中心	2013-09-09		0	0	0	0	0	0	0	0	0	0	0	0	0	0	0	0	0	0	0	0	0	0	0	0	0	-1	1	14	1					0	0	42	0	0	0
2017-02-04 15:42:03	2400100148	2	1	1958-03-28	西京医院	胃肠外科	2016-08-11	-1	0	0	0	0	0	0	0	0	0	0	0	0	0	0	0	0	0	0	0	0	0	0	0	0	0	-1	0	0						0	0	0	0	0	0
2016-05-06 11:06:38	1300200474	2		1968-09-06	福建省肿瘤医院	七区 胃肠肿瘤外科	2014-06-30		0	0	0	0	0	0	0	0	0	0	0	0	0	0	0	0	0	0	0	0	0	0	0	0	0		0	0						0	0	0	0	0	0
2016-05-19 13:35:09	500700157	2		1952-03-14	邢台市人民医院	肿瘤内科	2013-11-22	-1	0	0	0	0	0	0	0	0	0	0	0	0	0	0	0	0	0	0	0	0	0	0	0	0	0		0	0						0	0	0	0	0	0
2016-05-13 15:13:03	1300200050	2		1957-08-17	福建省肿瘤医院	干部保健特需病房	2014-03-16		0	0	0	0	0	0	0	0	0	0	0	0	0	0	0	0	0	0	0	0	0	0	0	0	0		0	0						0	0	0	0	0	0
2016-05-10 16:44:46	1300200871	2		1972-07-25	福建省肿瘤医院	干部保健特需病房	2015-03-30		0	0	0	0	0	0	0	0	0	0	0	0	0	0	0	0	0	0	0	0	0	0	0	0	0		1	4			1			7	0	0	0	1	7	1
2016-05-10 09:46:45	1300200683	1		1951-01-01	福建省肿瘤医院	干部保健特需病房	2014-10-29		0	0	0	0	0	0	0	0	0	0	0	0	0	0	0	0	0	0	0	0	0	0	0	0	0		0	0						0	0	0	0	0	0
2014-04-28 15:10:44	2100100152	1		1947-12-15	四川大学华西医院	肿瘤综合	2014-03-18	-1	0	0	0	0	0	0	0	0	0	0	0	0	0	0	0	0	0	0	0	0	0	1	1	7	50		1	0	1					0	0	0	0	1	14
2014-11-21 18:04:43	2400100008	1		1951-02-14	西京医院	胃肠外科	2014-09-23	-1	0	0	0	0	0	0	0	0	0	0	0	0	0	0	0	0	0	0	0	0	0	0	1	1	40	2	0	0						0	0	0	0	0	0
2015-01-26 16:20:17	2100100782	1		1967-10-06	四川大学华西医院	肿瘤二	2014-08-04	-1	0	0	0	0	0	0	0	0	0	0	0	0	0	0	0	0	0	0	0	0	0	0	1	7	20	3	0	0						0	0	0	0	0	0
2015-03-31 11:24:59	2400100031	1		1961-01-24	西京医院	胃肠外科	2014-11-27	-1	0	0	0	0	0	0	0	0	0	0	0	0	0	0	0	0	0	0	0	0	1	0	1	1	20	2	0	0						0	0	0	0	1	14	1
2015-10-30 16:31:46	2400100092	1		1981-02-23	西京医院	胃肠外科	2015-10-13	-1	0	0	0	0	0	0	0	0	0	0	0	0	0	0	0	0	0	0	0	0	0	0	1	14	10	2	1	2	1		1			1	0	2	0	0	0
2016-05-20 10:18:12	800101383	2		1953-10-26	吉林大学白求恩第一医院	肿瘤中心	2014-04-04		0	0	0	0	0	0	0	0	0	0	0	0	0	0	0	0	0	0	0	0	0	1	1	10	30	1	1	7	1					0	0	28	0	0	0
2015-04-19 13:01:46	800103627	1		1960-05-10	吉林大学白求恩第一医院	胃肠外科	2015-01-21	-1	0	1	0	0	0	0	0	0	0	0	0	0	0	0	0	0	0	0	0	0	0	0	1	7	40	1	1	7	1		1			7	0	6	0	0	0
2016-05-10 09:33:55	1300200664	1		1959-02-08	福建省肿瘤医院	干部保健特需病房	2014-11-03		0	0	0	0	0	0	0	0	0	0	0	0	0	0	0	0	0	0	0	0	0	0	1	2	13	3	1	2	1					0	0	14	0	1	7
2018-08-10 16:14:49	100900377	1		1971-02-14	首都医科大学附属北京世纪坛医院	结直肠肿瘤外科	2018-05-30	-1	0	0	0	0	0	0	0	0	0	0	0	0	0	0	0	0	0	0	0	0	1	0	1	7	10	2	0	0						0	0	0	0	0	0
2019-11-22 10:57:37	800109276	1		1954-06-18	吉林大学白求恩第一医院	肿瘤中心	2019-09-03	-1	0	0	0	0	0	0	0	0	0	0	0	0	0	0	0	0	0	0	0	0	1	0	1	7	45	1	1	21	1					0	0	35	0	0	0
2017-03-12 12:59:44	800105745	1		1976-09-18	吉林大学白求恩第一医院	胃肠外科	2016-01-19	-1	0	1	0	0	0	0	0	0	0	0	0	0	0	0	0	0	0	0	0	0	0	0	1	7	30	2	0	0						0	0	0	0	0	0
2017-12-17 12:20:43	800106283	2	1	1954-01-04	吉林大学白求恩第一医院	肿瘤中心	2017-05-16	-1	0	0	0	0	0	0	0	0	0	0	0	0	0	0	0	0	0	0	0	0	1	0	1	3	50	1	0	0						0	0	0	0	0	0
2017-01-19 15:40:31	2200100326	1		1957-10-04	贵州省遵义市医学院附属肿瘤医院（一附院）	腹部肿瘤科	2017-01-10	-1	0	0	0	0	0	0	0	0	0	0	0	0	0	0	0	0	0	0	0	0	1	0	1	4	30	2	1	7	1					0	0	21	0	1	7	1
2014-11-19 09:31:20	2800100662	1		1967-05-03	广西医科大学附属肿瘤医院	胃肠二区	2014-08-20	-1	0	0	0	0	0	0	0	0	0	0	0	0	0	0	0	0	0	0	0	0	0	0	1	1	20	2	0	0						0	0	0	0	0	0
2015-04-12 19:01:25	800103459	1		1962-09-20	吉林大学白求恩第一医院	胃肠外科	2014-04-08		0	1	0	0	0	0	0	0	0	0	0	0	0	0	0	0	0	0	0	0	0	0	1	20	30	1	0	0						0	0	0	0	0	0
2016-05-13 15:28:25	1300200158	1		1950-10-02	福建省肿瘤医院	三十一区 腹部肿瘤内科	2014-04-10		0	0	0	0	0	0	0	1	0	0	0	0	0	0	0	0	0	0	0	0	0	1	1	2	40	2	0	0						0	0	0	0	0	0
2016-05-11 09:10:04	1300200884	1		1958-06-24	福建省肿瘤医院	三十一区 腹部肿瘤内科	2015-03-23		0	0	1	0	0	0	1	0	0	0	0	0	0	0	0	0	0	0	0	0	0	1	1	7	38	3	0	0						0	0	0	0	0	0
2017-05-19 16:18:23	1300201555	1		1959-04-19	福建省肿瘤医院	干部保健特需病房	2017-05-09		0	0	0	0	0	0	0	0	0	0	0	0	0	0	0	0	1	0	0	0	0	0	1	14	40	2	0	0						0	0	0	0	1	7	1	1
2016-05-13 15:06:11	1300200005	1		1990-11-27	福建省肿瘤医院	干部保健特需病房	2013-12-03		0	0	0	0	0	0	0	0	0	0	0	0	0	0	0	0	0	0	0	0	0	1	1	3	5	2	0	0						0	0	0	0	0	0
2019-12-01 10:25:09	800109448	1		1972-04-10	吉林大学白求恩第一医院	肿瘤中心	2019-07-09	-1	0	0	0	0	0	0	0	0	0	0	0	0	0	0	0	0	0	0	0	0	1	1	1	4	20	2	0	0						0	0	0	0	0	0
2015-10-16 09:05:22	400200198	1		1963-08-14	重庆市第三人民医院	肿瘤血液科	2015-09-22	-1	0	0	0	0	0	0	0	0	0	0	0	0	0	0	0	0	0	0	0	0	0	0	1	4	30	2	1	7	1					0	0	21	0	1	7	1
2014-11-17 18:14:56	2800100653	1		1951-05-05	广西医科大学附属肿瘤医院	胃肠一区	2014-10-06	-1	0	0	0	0	0	0	0	0	0	0	0	0	0	0	0	0	0	0	0	0	0	0	1	7	40	2	1	6				1		0	0	7	0	1	3	1
2015-04-27 11:49:18	800103694	1		1951-10-02	吉林大学白求恩第一医院	肿瘤中心	2015-04-13		0	0	0	0	0	0	0	0	0	0	0	0	0	0	0	0	0	0	0	0	0	0	1	7	30	1	0	0						0	0	0	0	0	0
2016-08-24 10:44:33	1300201383	1		1968-04-25	福建省肿瘤医院	干部保健特需病房	2016-07-20		0	0	0	0	0	0	0	0	0	0	0	0	0	0	0	0	0	0	0	0	1	1	1	5	35	2	1	7			1			2	0	0	0	1	7
2016-05-12 10:24:21	1300201064	1		1943-11-28	福建省肿瘤医院	干部保健特需病房	2015-10-22		0	0	0	0	0	0	0	0	0	0	0	0	0	0	0	0	0	0	0	0	0	0	1	7	60	1	0	0						0	0	0	0	1	7	1
2016-05-16 18:37:20	800104763	1		1952-02-26	吉林大学白求恩第一医院	胃肠外科	2015-06-24		0	0	0	0	0	0	0	0	0	0	0	0	0	0	0	0	0	0	0	0	0	0	1	7	30	1	0	0						0	0	0	0	0	0
2014-11-12 15:07:37	800102695	1		1965-05-20	吉林大学白求恩第一医院	肿瘤中心	2014-08-13		0	1	0	0	0	0	0	0	0	0	0	0	0	0	1	0	0	0	0	0	0	1	1	7	25	1	1	3	1					0	0	10	0	0	0
2016-12-22 17:30:27	400101824	1		1955-07-06	重庆大坪医院	胃结直肠外科	2016-08-08		0	0	0	0	0	0	0	0	0	0	0	0	0	0	0	0	0	0	0	0	1	0	1	7	30	3	1	7	1					0	0	14	0	1	7	1
2016-05-18 15:36:51	500700072	1		1957-02-06	邢台市人民医院	肿瘤外科	2014-12-07	-1	0	0	0	0	0	0	0	0	0	0	0	0	0	0	0	0	0	0	0	0	0	0	1	7	30	2	1	7	1					0	0	21	0	0	0
2017-11-17 15:30:01	1300201865	1		1951-10-16	福建省肿瘤医院	干部保健特需病房	2017-11-14		0	0	0	0	0	0	0	0	0	0	0	0	0	0	0	0	0	0	0	0	1	0	0	0	0	4	0	0						0	0	0	0	0	0
2015-03-19 09:25:02	300100083	2		1946-05-31	上海瑞金医院	外科三病区	2014-10-14	-1	0	0	0	0	0	0	0	0	0	0	0	0	0	0	0	0	0	0	0	0	0	0	0	0	0		0	0						0	0	0	0	0	0
2015-08-17 20:30:29	800104316	2		1951-08-16	吉林大学白求恩第一医院	肿瘤中心	2015-06-21		0	0	0	0	0	0	0	0	0	0	0	0	0	0	0	0	0	0	0	0	0	0	0	0	0	-1	0	0						0	0	0	0	0	0
2018-12-30 23:14:02	800107684	2		1986-02-15	吉林大学白求恩第一医院	肿瘤中心	2018-07-30	-1	0	0	0	0	0	0	0	0	0	0	0	0	0	0	0	0	0	0	0	0	1	1	0	0	0	4	0	0						0	0	0	0	0	0
2019-06-22 15:35:11	2300103132	2	2	1960-01-01	昆明医科大学第一附属医院	普外一科（胃肠与疝外科）	2019-06-12	-1	0	0	0	0	0	0	0	0	0	0	0	0	0	0	0	0	0	0	0	0	1	0	0	0	0	4	0	0						0	0	0	0	0	0
2019-11-22 17:35:07	800109309	2	1	1966-12-06	吉林大学白求恩第一医院	肿瘤中心	2019-05-21	-1	0	0	0	0	0	0	0	0	0	0	0	0	0	0	0	0	0	0	0	0	1	0	0	0	0	4	0	0						0	0	0	0	1	7
2015-01-27 11:24:45	500400046	2		1954-06-01	河北医科大学第二医院（东院）	普通外科	2014-03-14		1	0	0	0	0	0	0	0	0	0	0	0	0	0	0	0	0	0	0	0	0	0	0	0	0		0	0						0	0	0	0	0	0
2017-02-23 17:29:53	2400100182	2		1944-08-07	西京医院	胃肠外科	2016-07-15	-1	0	0	0	0	0	0	0	0	0	1	0	0	0	0	0	0	0	0	0	0	0	0	0	0	0	4	0	0						0	0	0	0	0	0
2019-02-28 15:36:23	2300102811	2		1964-07-24	昆明医科大学第一附属医院	肿瘤外科	2019-02-28	-1	0	0	0	0	0	0	0	0	0	0	0	0	0	0	0	0	0	0	0	0	1	0	0	0	0	4	0	0						0	0	0	0	0	0
2017-11-28 08:22:56	400102391	2		1962-06-03	重庆大坪医院	肿瘤科	2017-08-21	-1	0	0	0	0	0	0	0	0	0	1	0	0	0	0	0	0	0	0	0	0	0	0	0	0	0	4	0	0						0	0	0	0	0	0
2016-05-03 14:47:44	900200192	1		1950-02-15	哈医大四院	肿瘤内科	2016-03-20		0	0	0	0	0	0	0	0	1	0	0	0	0	0	0	0	0	0	0	0	0	0	0	0	0		0	0						0	0	0	0	0	0
2015-01-21 16:43:35	400100482	2		1965-04-01	重庆大坪医院	消化科	2015-01-15	-1	0	0	0	0	0	0	0	0	0	0	0	0	0	0	0	0	1	0	0	0	0	0	0	0	0	-1	0	0						0	0	0	0	0	0
2016-05-20 15:08:02	500400025	1		1963-09-20	河北医科大学第二医院（东院）	普通外科	2013-11-28		0	0	0	0	0	0	0	0	0	0	0	0	0	0	0	0	1	0	0	0	0	1	0	0	0	-1	0	0						0	0	0	0	0	0
2015-10-21 11:35:50	1901300168	2		1984-05-26	佛山市第一人民医院	肿瘤内科	2013-01-29		0	0	0	0	0	0	0	0	0	0	0	0	0	0	0	0	0	0	0	0	0	0	0	0	0		0	0						0	0	0	0	0	0
2016-05-19 14:08:16	500700228	2		1984-10-02	邢台市人民医院	肿瘤内科	2014-12-04	-1	0	0	0	0	0	0	0	0	0	0	0	0	0	0	0	0	0	0	0	0	0	0	0	0	0		0	0						0	0	0	0	1	1
2016-05-19 13:54:39	500700197	1		1949-11-11	邢台市人民医院	肿瘤内科	2014-11-28	-1	0	0	0	0	0	0	0	0	0	0	0	0	0	0	0	0	0	0	0	0	0	1	0	0	0		0	0						0	0	0	0	0	0
2014-12-26 19:16:04	1901300115	1		1981-10-23	佛山市第一人民医院	肿瘤内科	2013-06-13		0	0	0	0	0	0	0	0	0	0	0	0	0	0	0	0	0	0	0	0	0	0	0	0	0		0	0						0	0	0	0	0	0
2016-02-16 16:13:15	1200100581	2		1949-03-02	安徽省肿瘤医院	肿四	2016-02-14	-1	0	0	0	0	0	0	0	0	0	0	0	0	0	0	0	0	0	0	0	0	0	0	0	0	0		0	0						0	0	0	0	0	0
2015-04-17 11:35:02	2400100001	1		1964-03-21	西京医院	胃肠外科	2014-09-01	-1	0	0	0	0	0	0	0	0	0	0	0	0	0	0	0	0	0	0	0	0	1	0	0	0	0	-1	0	0						0	0	0	0	0	0
2019-03-29 20:20:52	800108182	2		1963-08-27	吉林大学白求恩第一医院	肿瘤中心	2018-12-20	-1	0	0	0	0	0	0	0	0	0	0	0	0	0	0	0	0	0	0	0	0	1	0	0	0	0	4	0	0						0	0	0	0	0	0
2014-02-26 13:55:31	800100422	2		1986-02-08	吉林大学白求恩第一医院	肿瘤中心	2013-05-14		0	0	0	0	0	0	0	0	0	0	0	0	0	0	0	0	0	0	0	0	0	0	0	0	0	-1	0	0						0	0	0	0	0	0
2016-05-19 13:45:48	500700173	2		1950-06-18	邢台市人民医院	肿瘤内科	2014-02-07	-1	0	0	0	0	0	0	0	0	0	0	0	0	0	0	0	0	0	0	0	0	0	0	0	0	0		0	0						0	0	0	0	0	0
2016-05-13 15:26:05	1300200143	1		1969-06-23	福建省肿瘤医院	二十三区 中西医结合科	2014-03-31		0	0	0	0	0	0	0	0	0	1	0	0	0	0	0	0	0	0	0	0	0	0	0	0	0		0	0						0	0	0	0	0	0
2018-12-27 15:42:01	800107235	2	1	1958-09-27	吉林大学白求恩第一医院	肿瘤中心	2018-10-08	-1	0	0	0	0	0	0	0	0	0	0	0	0	0	0	0	0	0	0	0	0	1	1	0	0	0	4	0	0						0	0	0	0	0	0
2016-05-10 11:01:06	1300200747	2		1944-02-05	福建省肿瘤医院	干部保健特需病房	2014-12-29		0	0	0	0	0	0	0	0	0	0	0	0	0	0	0	0	0	0	0	0	0	0	0	0	0		0	0						0	0	0	0	0	0
2016-05-03 10:15:34	1300200223	2		1954-01-01	福建省肿瘤医院	干部保健特需病房	2014-05-08		0	0	0	0	0	0	0	0	0	0	0	0	0	0	0	0	0	0	0	0	0	0	0	0	0		0	0						0	0	0	0	0	0
2016-05-10 16:34:12	1300200859	2		1958-05-17	福建省肿瘤医院	七区 胃肠肿瘤外科	2015-02-25		0	0	0	0	0	0	0	0	0	0	0	0	0	0	0	0	0	0	0	0	0	0	0	0	0		0	0						0	0	0	0	0	0
2015-08-17 20:32:53	800104287	2		1954-03-20	吉林大学白求恩第一医院	胃肠外科	2015-06-16		0	0	0	0	0	0	0	1	0	0	0	0	0	0	0	0	0	0	0	0	0	0	0	0	0	-1	0	0						0	0	0	0	0	0
2015-04-28 17:24:45	2400100048	1		1952-04-02	西京医院	胃肠外科	2014-12-29	-1	0	0	0	0	0	0	0	0	0	0	0	0	0	0	0	0	0	0	0	0	1	0	1	3	40	2	0	0						0	0	0	0	1	7	1
2016-04-19 15:57:26	1200100825	1		1955-04-15	安徽省肿瘤医院	肿三	2016-04-11	-1	0	0	0	0	0	0	0	0	0	0	0	0	0	0	0	0	0	0	0	0	0	0	1	14	30	2	1	14	1					0	0	35	0	1	14	1
2015-08-04 17:00:59	800104098	1		1953-09-15	吉林大学白求恩第一医院	胃肠外科	2015-05-26		0	0	0	0	0	0	0	0	0	0	0	0	0	0	0	0	0	0	0	0	0	0	1	7	40	1	1	3	1					0	0	5	0	1	14
2016-05-12 10:16:23	1300201058	1		1954-07-16	福建省肿瘤医院	干部保健特需病房	2015-09-21		0	0	0	0	0	0	0	0	0	0	0	0	0	0	0	0	0	0	0	0	0	0	1	1	5	3	0	0						0	0	0	0	0	0
2016-05-10 13:17:18	3200100296	1		1946-03-07	新疆喀什地区第一人民医院	普外三科	2015-03-31		0	0	0	0	0	0	0	0	0	0	0	0	0	0	0	0	0	0	0	0	0	0	1	3	20	4	0	0						0	0	0	0	0	0
2014-08-13 16:02:35	400100036	1		1952-06-10	重庆大坪医院	肿瘤科	2014-04-14	-1	0	0	0	0	0	0	0	0	0	0	0	0	0	0	0	0	0	0	0	0	0	0	1	7	20	2	1	7	1		1			7	0	21	0	1	7	1
2019-11-13 11:02:38	800108935	1		1951-05-02	吉林大学白求恩第一医院	肿瘤中心	2018-11-07	-1	0	0	0	0	0	0	0	0	0	0	0	0	0	0	0	0	0	0	0	0	1	0	1	6	30	3	0	0						0	0	0	0	0	0
2016-05-04 11:22:48	1300200360	1		1943-08-04	福建省肿瘤医院	七区 胃肠肿瘤外科	2014-05-30		0	0	0	1	0	0	0	0	0	0	0	0	0	0	0	0	0	0	0	0	0	0	1	1	50	1	0	0						0	0	0	0	0	0
2016-05-09 09:54:15	1300200575	1		1973-08-24	福建省肿瘤医院	干部保健特需病房	2014-09-16		0	0	0	0	0	0	0	0	0	0	0	0	0	0	0	0	0	0	0	0	0	0	1	7	10	3	1	2			1			3	0	0	0	0	0
2016-05-19 14:07:57	500700227	1		1949-07-08	邢台市人民医院	肿瘤内科	2014-01-16	-1	0	0	0	0	0	0	0	0	0	0	0	0	0	0	0	0	0	0	0	0	0	0	1	3	15	2	0	0						0	0	0	0	0	0
2016-11-29 18:56:56	400101715	1		1955-11-18	重庆大坪医院	肿瘤科	2016-08-22		0	0	0	0	0	0	0	1	0	0	0	0	0	0	0	0	0	0	0	0	0	0	1	2	28	2	0	0						0	0	0	0	0	0
2016-05-19 13:34:46	500700156	1		1954-12-12	邢台市人民医院	肿瘤内科	2014-07-29	-1	0	0	0	0	0	0	0	0	0	0	0	0	0	0	0	0	0	0	0	0	0	0	1	4	40	2	1	1	1					0	0	5	0	0	0
2019-06-18 22:09:01	800108429	2	1	1948-12-20	吉林大学白求恩第一医院	肿瘤中心	2019-01-03	-1	0	0	0	0	0	0	0	1	0	0	0	0	0	0	0	0	0	0	0	0	0	0	1	5	50	1	0	0						0	0	0	0	0	0
2015-10-19 18:50:08	1901300153	1		1958-08-25	佛山市第一人民医院	肿瘤内科	2013-08-05		0	0	0	0	0	0	0	0	0	0	0	0	0	0	0	0	0	0	0	0	0	0	1	7	30	1	0	0						0	0	0	0	1	7
2016-05-13 10:46:48	1300201174	1		1953-05-30	福建省肿瘤医院	干部保健特需病房	2016-01-20		0	0	0	0	0	0	0	0	0	0	0	0	0	0	0	0	0	0	0	0	0	0	1	7	32	2	0	0						0	0	0	0	1	7	1
2017-05-24 09:44:12	1300201559	1		1961-01-16	福建省肿瘤医院	干部保健特需病房	2017-05-09		0	0	0	0	0	0	0	0	0	0	0	0	0	0	0	0	0	0	0	0	1	0	1	7	15	2	0	0						0	0	0	0	0	0
2018-06-01 16:49:31	100900297	1		1948-03-23	首都医科大学附属北京世纪坛医院	结直肠肿瘤外科	2018-03-14	-1	0	0	0	0	0	0	0	0	0	0	0	0	0	0	0	0	0	0	0	0	1	0	1	3	50	2	0	0						0	0	0	0	1	14	1
2016-05-19 13:46:17	500700174	1		1954-10-03	邢台市人民医院	肿瘤内科	2014-08-01	-1	0	0	0	0	0	0	0	0	0	0	0	0	0	1	0	0	0	0	0	0	0	0	1	2	30	2	1	1			1			1	0	0	0	0	0
2015-07-30 12:10:48	1901300128	1		1949-06-16	佛山市第一人民医院	肿瘤内科	2013-06-27		0	0	0	0	0	0	1	1	0	0	0	0	0	0	0	0	0	0	0	0	0	0	1	19	31	1	1	2	1		1	1		10	0	20	0	1	16	1	1
2015-04-12 20:00:18	800103473	1		1951-06-11	吉林大学白求恩第一医院	肿瘤中心	2014-07-06	-1	0	0	0	0	0	0	0	0	0	0	0	0	0	0	0	0	0	0	0	0	0	0	1	8	40	1	0	0						0	0	0	0	0	0
2016-05-13 15:29:39	1300200167	1		1970-08-02	福建省肿瘤医院	三十一区 腹部肿瘤内科	2014-04-29		0	0	0	0	0	0	0	0	0	0	0	0	0	0	0	0	0	0	0	0	0	0	1	10	22	2	1	6			1			20	0	0	0	1	23		1
2014-08-31 23:03:48	800102530	2		1940-09-22	吉林大学白求恩第一医院	肿瘤中心	2014-07-23		0	0	0	0	0	0	0	1	0	0	0	0	0	0	0	0	0	0	0	0	0	0	0	0	0	-1	0	0						0	0	0	0	0	0
2016-06-12 16:50:52	1200100926	2		1940-08-30	安徽省肿瘤医院	肿三	2016-05-27	-1	0	0	0	0	0	0	0	0	0	0	0	0	0	0	0	0	1	0	0	0	0	0	0	0	0	-1	0	0						0	0	0	0	0	0
2015-08-10 21:47:27	800104285	1		1940-07-02	吉林大学白求恩第一医院	胃肠外科	2015-07-07		0	0	0	0	0	0	0	1	0	0	0	0	0	0	1	0	0	0	0	0	0	0	0	0	0	-1	0	0						0	0	0	0	0	0
2017-01-24 10:42:11	2400100132	1		1943-08-09	西京医院	胃肠外科	2016-08-17	-1	0	0	0	0	0	0	0	0	1	0	0	0	0	0	0	0	0	0	0	0	0	0	0	0	0	-1	0	0						0	0	0	0	1	1	1
2017-01-20 11:46:35	2400100104	1		1944-06-08	西京医院	胃肠外科	2016-09-24	-1	0	1	0	0	0	0	1	1	0	0	0	0	0	0	0	0	0	0	0	0	0	1	0	0	0	-1	0	0						0	0	0	0	0	0
2017-05-19 15:45:46	1300201551	1		1946-02-21	福建省肿瘤医院	干部保健特需病房	2017-05-04		0	0	0	0	0	0	0	1	0	0	0	0	0	0	0	0	0	0	0	0	0	1	0	0	0	4	0	0						0	0	0	0	0	0
2018-06-01 16:59:51	100900298	1		1946-08-26	首都医科大学附属北京世纪坛医院	结直肠肿瘤外科	2018-03-31	-1	0	0	0	0	0	0	1	1	1	0	0	0	0	0	0	0	1	0	0	0	0	0	0	0	0	4	0	0						0	0	0	0	0	0
2018-01-25 15:21:59	1300202089	1		1937-10-22	福建省肿瘤医院	干部保健特需病房	2018-01-18	-1	0	0	0	0	0	0	0	1	0	0	0	0	0	0	0	0	0	0	0	0	0	1	0	0	0	4	0	0						0	0	0	0	0	0
2018-12-31 12:23:26	800107700	1		1946-04-23	吉林大学白求恩第一医院	肿瘤中心	2018-10-25	-1	0	0	0	0	0	0	0	0	0	0	0	0	0	0	0	0	0	0	0	0	1	0	0	0	0	4	0	0						0	0	0	0	0	0
2018-12-24 17:49:03	2300102626	1		1943-02-23	昆明医科大学第一附属医院	普外一科（胃肠与疝外科）	2018-11-24	-1	0	0	0	0	0	0	0	0	0	0	0	0	0	0	0	0	0	0	0	0	1	0	0	0	0	4	0	0						0	0	0	0	1	3	1
2019-06-03 14:22:05	800108396	2	1	1947-04-22	吉林大学白求恩第一医院	肿瘤中心	2019-04-01	-1	0	0	0	0	0	0	0	1	0	0	0	0	0	1	0	0	0	0	0	0	0	0	0	0	0	4	0	0						0	0	0	0	1	7	1
2014-06-12 18:33:42	400100103	1		1932-09-04	重庆大坪医院	肿瘤科	2014-05-28	-1	0	0	0	0	0	0	0	0	0	0	0	0	0	0	0	0	0	0	0	0	0	0	0	0	0		0	0						0	0	0	0	1	7
2016-05-16 16:04:10	800105126	1		1939-07-10	吉林大学白求恩第一医院	胃肠外科	2015-07-20	-1	0	0	0	0	0	0	0	0	0	0	0	0	0	0	0	0	0	0	0	0	0	0	0	0	0	-1	0	0						0	0	0	0	0	0
2016-05-03 15:05:16	1300200316	1		1938-09-06	福建省肿瘤医院	三十一区 腹部肿瘤内科	2014-06-03		0	0	0	0	0	0	0	1	1	0	0	0	0	0	0	0	0	0	0	0	0	0	0	0	0		0	0						0	0	0	0	0	0
2015-08-19 17:11:27	800104493	1		1943-04-07	吉林大学白求恩第一医院	胃肠外科	2015-04-12		0	0	0	0	0	0	0	1	1	1	0	0	0	0	0	0	0	0	0	0	0	0	0	0	0	-1	0	0						0	0	0	0	0	0
2016-05-05 16:54:27	1300200434	1		1942-03-03	福建省肿瘤医院	三十一区 腹部肿瘤内科	2014-06-25		0	0	0	0	0	0	1	0	1	0	0	0	0	0	0	0	0	0	0	0	0	0	0	0	0		0	0						0	0	0	0	0	0
2017-11-17 16:42:15	1300201874	1		1944-07-04	福建省肿瘤医院	干部保健特需病房	2017-11-09		0	0	0	0	0	0	1	0	0	0	0	0	0	0	0	0	0	0	0	0	0	0	0	0	0	4	0	0						0	0	0	0	0	0
2018-06-09 10:12:37	800106573	1		1944-10-18	吉林大学白求恩第一医院	肿瘤中心	2017-08-07	-1	0	0	0	0	0	0	0	1	0	0	0	0	0	0	0	0	0	0	0	0	0	0	0	0	0	4	0	0						0	0	0	0	0	0
2014-04-30 16:07:14	800101371	1		1934-08-08	吉林大学白求恩第一医院	胃肠外科	2014-02-24		0	0	0	0	0	0	0	0	0	0	0	0	0	0	0	0	0	0	0	0	0	0	0	0	0	-1	1	7	1					0	0	7	0	1	7		1
2015-09-23 15:18:18	800104786	1		1941-10-19	吉林大学白求恩第一医院	胃肠外科	2015-06-19	-1	0	0	0	0	0	0	0	0	0	0	0	0	0	0	0	0	0	0	0	0	0	0	0	0	0	-1	0	0						0	0	0	0	0	0
2016-05-13 15:21:04	1300200111	1		1940-01-01	福建省肿瘤医院	干部保健特需病房	2014-03-28		0	0	0	0	0	0	0	0	0	0	0	0	0	0	0	0	0	0	0	0	0	0	0	0	0		0	0						0	0	0	0	0	0
2019-01-09 10:36:38	1300202673	2	1	1944-11-18	福建省肿瘤医院	干部保健特需病房	2018-12-25	-1	0	0	0	0	0	0	1	1	0	0	0	0	0	0	0	0	0	0	0	0	0	0	0	0	0	4	0	0						0	0	0	0	1	5	1	1
2018-06-09 16:17:09	400102738	2	1	1939-09-09	重庆大坪医院	胃结直肠外科	2018-02-05	-1	0	0	0	0	0	0	0	1	0	0	0	0	0	0	0	0	0	0	0	0	0	0	0	0	0	4	0	0						0	0	0	0	0	0
2013-08-11 11:33:40	1901700007	2		1941-01-01	惠州中心人民医院	肿瘤内科	2013-06-02	-1	0	0	0	0	0	0	0	1	0	0	0	0	0	0	0	0	0	0	0	0	0	0	0	0	0	4	0	0						0	0	0	0	0	0
2016-05-13 15:27:46	1300200153	1		1936-01-01	福建省肿瘤医院	七区 胃肠肿瘤外科	2014-04-08		0	0	0	0	0	0	0	1	0	0	0	0	0	0	0	0	0	0	0	0	0	0	0	0	0		0	0						0	0	0	0	0	0
2016-05-05 16:52:02	1300200432	1		1935-05-01	福建省肿瘤医院	三十一区 腹部肿瘤内科	2014-06-30		0	0	0	0	0	0	1	0	0	0	0	0	0	0	0	0	0	0	0	0	0	0	0	0	0		0	0						0	0	0	0	0	0
2017-02-27 16:25:08	2400100194	1		1936-11-21	西京医院	胃肠外科	2016-06-30	-1	0	0	0	0	0	0	0	0	0	0	0	0	0	0	0	0	0	0	0	0	0	0	1	7	15	2	0	0						0	0	0	0	0	0
2015-03-19 10:25:48	300100029	1		1933-02-01	上海瑞金医院	外科四病区	2014-09-09	-1	0	0	0	0	0	0	0	0	0	0	0	0	0	0	0	0	0	0	0	0	0	0	1	1	0		1	0						0	3.5	0	0	1	7	1
2015-05-04 16:59:46	2400100021	1		1941-05-05	西京医院	胃肠外科	2014-12-20	-1	0	0	0	0	0	0	0	0	0	0	0	0	0	0	0	0	0	0	0	0	1	0	1	7	15	2	0	0						0	0	0	0	1	7	1	1
2016-05-19 17:30:11	800102335	1		1942-02-23	吉林大学白求恩第一医院	胃肠外科	2014-03-27	-1	0	0	0	0	0	0	0	0	0	0	0	0	0	0	0	0	0	0	0	0	0	0	1	14	54	1	1	21	1					0	0	21	0	0	0
2015-10-02 18:38:42	1200100331	1		1938-06-01	安徽省肿瘤医院		2015-07-13	-1	0	0	0	0	0	0	0	0	0	0	0	0	0	0	0	0	0	0	0	0	0	0	1	7	55		0	0						0	0	0	0	0	0
2016-05-19 14:49:13	800103280	1		1940-08-08	吉林大学白求恩第一医院	胃肠外科	2014-09-28		0	0	0	0	0	0	0	0	0	0	0	0	0	0	0	0	0	0	0	0	0	0	1	7	45	1	0	0						0	0	0	0	1	7	1	1
2015-10-30 22:23:01	800104984	1		1940-11-12	吉林大学白求恩第一医院	胃肠外科	2015-06-29	-1	0	0	0	0	0	0	0	1	0	0	0	0	0	0	0	0	0	0	0	0	0	0	1	5	40	1	0	0						0	0	0	0	1	7	1	1
2017-02-04 17:21:59	2400100154	1		1945-06-24	西京医院	胃肠外科	2016-08-03	-1	0	0	0	0	0	0	0	0	0	0	0	0	0	0	0	0	0	0	0	0	0	1	1	3	30	3	0	0						0	0	0	0	1	3	1
2017-02-28 20:16:22	800105690	1		1941-06-27	吉林大学白求恩第一医院	胃肠外科	2015-12-09		0	0	0	0	0	0	0	0	0	0	0	0	0	0	0	0	0	0	0	0	1	0	1	7	50	2	1	7	1					0	0	14	0	1	7	1	1
2018-01-28 11:52:43	2800400231	1		1946-09-17	广西医科大学一附院	胃肠腺体外科	2017-11-10	-1	0	0	0	0	0	0	0	0	0	0	0	0	0	0	0	0	0	0	0	0	1	0	1	7	52	2	1	14				1		0	0	35	0	0	0
2017-06-25 14:40:42	2300101310	1		1943-08-27	昆明医科大学第一附属医院	普外一科（胃肠与疝外科）	2017-05-02	-1	0	0	0	0	0	0	1	1	0	0	0	0	0	0	0	0	0	0	0	0	0	0	1	14	30	1	1	7	1					0	0	4	0	1	7
2018-02-26 10:46:00	400102560	1		1943-08-24	重庆大坪医院	胃结直肠外科	2017-12-18	-1	0	0	0	0	0	0	0	0	0	0	0	0	0	0	0	0	0	0	0	0	1	0	1	4	45	1	0	0						0	0	0	0	0	0
2016-07-01 17:51:24	400101342	1		1938-07-26	重庆大坪医院	胃结直肠外科	2016-03-15		0	0	0	0	0	0	0	0	0	0	0	0	0	0	0	0	1	0	0	0	0	0	1	4	50	3	1	14	1					0	0	28	0	0	0
2015-10-25 21:28:45	800104937	1		1941-08-16	吉林大学白求恩第一医院	胃肠外科	2015-06-26		0	0	0	0	0	0	0	0	1	0	0	0	0	0	0	0	0	0	0	0	0	0	1	5	30	1	0	0						0	0	0	0	0	0
2016-05-19 13:35:56	500700160	1		1938-12-12	邢台市人民医院	肿瘤内科	2013-11-27	-1	0	0	0	0	0	0	0	0	0	0	0	0	0	0	0	0	0	0	0	0	0	0	1	4	20	2	0	0						0	0	0	0	1	4	1
2016-05-10 16:48:28	1200100402	1		1940-02-19	安徽省肿瘤医院	肿三	2015-11-24	-1	0	0	0	0	0	0	0	0	0	0	0	0	0	0	0	0	0	0	0	0	0	1	1	14	40	3	1	7	1					0	0	14	0	0	0
2016-05-03 10:26:33	1300200227	1		1934-01-08	福建省肿瘤医院	干部保健特需病房	2014-05-05		0	0	0	0	0	0	0	1	0	0	0	0	0	0	0	0	0	0	0	0	0	0	1	4	60	1	0	0						0	0	0	0	0	0
2017-03-11 15:05:01	800105695	1		1938-07-21	吉林大学白求恩第一医院	胃肠外科	2015-09-07		0	1	0	0	0	0	0	0	0	0	0	0	0	0	0	0	0	0	0	0	0	0	1	7	30	3	0	0						0	0	0	0	0	0
2016-05-19 13:31:54	500700150	1		1936-10-01	邢台市人民医院	肿瘤内科	2014-10-08	-1	0	0	0	0	0	0	0	0	0	0	0	0	0	0	0	0	0	0	0	0	0	0	1	8	40	2	0	0						0	0	0	0	0	0
2014-03-02 17:08:54	800100847	1		1940-04-04	吉林大学白求恩第一医院	肿瘤中心	2014-01-10		0	0	0	0	0	0	0	1	0	0	0	0	0	0	0	0	0	0	0	0	0	0	1	3	20	1	0	0						0	0	0	0	0	0
2014-06-12 16:25:13	800101721	1		1942-12-12	吉林大学白求恩第一医院	胃肠外科	2014-05-12		0	0	1	0	0	0	1	1	0	0	0	0	0	0	0	0	0	0	0	0	0	0	1	7	50	1	0	0						0	0	0	0	1	7		1
2018-01-10 11:22:14	400102451	1		1945-06-10	重庆大坪医院	胃结直肠外科	2017-11-20	-1	0	0	0	0	0	0	0	0	0	0	0	0	0	0	0	0	0	0	0	0	0	0	1	7	30	1	1	6	1					0	0	30	0	0	0
2017-05-25 16:35:16	1300201572	1		1940-04-27	福建省肿瘤医院	干部保健特需病房	2017-04-24		0	0	0	0	0	0	0	1	0	0	0	0	0	0	0	0	0	0	0	0	0	0	1	7	25	3	1	7	1					0	0	14	0	1	7	1
2014-10-16 10:46:53	2800100632	1		1943-05-05	广西医科大学附属肿瘤医院	胃肠一区	2014-08-26	-1	0	0	0	0	0	0	0	0	0	0	0	0	0	0	0	0	0	0	0	0	0	0	1	3	15	2	1	4	1					0	0	3	0	0	0
2019-11-25 15:38:45	800109409	1		1947-12-07	吉林大学白求恩第一医院	肿瘤中心	2019-10-08	-1	0	0	0	0	0	0	0	0	0	0	0	0	0	0	0	0	0	0	0	0	1	1	1	2	30	3	1	1	1					0	0	1	0	0	0
2016-05-13 15:28:35	1300200159	1		1942-10-08	福建省肿瘤医院	干部保健特需病房	2014-04-16		0	0	0	0	0	0	0	0	0	0	0	0	0	0	0	0	0	0	0	0	0	0	1	7	25	3	1	21	1			1		0	0	70	0	1	7		1
2016-05-13 15:16:00	1300200066	1		1942-01-18	福建省肿瘤医院	七区 胃肠肿瘤外科	2014-02-12		0	0	0	0	0	0	0	1	1	0	0	0	0	0	0	0	0	0	0	0	0	0	1	7	15	2	0	0						0	0	0	0	0	0
2018-06-13 16:21:19	1300202350	1		1932-03-06	福建省肿瘤医院	干部保健特需病房	2018-05-14	-1	0	0	0	0	0	0	0	0	0	0	0	0	0	0	0	0	0	0	0	0	1	0	1	7	30	3	0	0						0	0	0	0	0	0
2016-05-03 11:37:47	1300200289	1		1938-09-05	福建省肿瘤医院	三十一区 腹部肿瘤内科	2014-05-27		0	0	0	0	0	0	0	1	0	0	0	0	0	0	0	0	0	0	0	0	0	1	1	4	50	1	0	0						0	0	0	0	1	7		1
2017-12-22 11:40:48	1300201968	1		1946-08-19	福建省肿瘤医院	干部保健特需病房	2017-12-14		0	0	0	0	0	0	0	0	0	0	0	0	0	0	0	0	0	0	0	0	1	0	1	1	43	1	0	0						0	0	0	0	0	0
2016-05-04 10:51:36	1300200342	1		1940-02-04	福建省肿瘤医院	七区 胃肠肿瘤外科	2014-05-12		0	0	0	0	0	0	0	0	0	0	0	0	0	0	0	0	0	0	0	0	0	0	1	7	40	2	1	7	1			1		0	0	14	0	1	7
2019-12-23 11:42:26	2800400326	1		1946-03-17	广西医科大学一附院	胃肠腺体外科	2019-06-14	-1	0	0	0	0	0	0	0	0	1	0	0	0	0	0	0	0	0	0	0	0	0	0	1	1	30	4	0	0						0	0	0	0	0	0
2016-05-13 15:11:51	1300200042	1		1938-04-15	福建省肿瘤医院	干部保健特需病房	2014-03-18		0	0	0	0	0	0	0	0	0	0	0	0	0	0	0	0	0	0	0	0	0	0	1	14	15	2	0	0						0	0	0	0	1	7	1
2014-03-31 16:29:49	1900100113	1		1941-09-17	中山大学第一附属医院	胃肠外科	2012-12-14		0	0	0	0	0	0	0	0	0	0	0	0	0	0	0	0	0	0	0	0	0	0	1	14	50	1	0	0						0	0	0	0	1	14	1	1
2015-03-19 16:47:53	2400100026	1		1943-04-07	西京医院	胃肠外科	2015-03-19	-1	0	0	0	0	0	0	0	1	0	0	0	0	0	0	0	0	0	0	0	0	0	0	0	0	0	-1	0	0						0	0	0	0	1	7	1	1
2014-08-10 15:02:28	800102352	1		1937-02-26	吉林大学白求恩第一医院	肿瘤中心	2014-05-31		0	0	0	0	0	0	1	0	0	0	0	0	0	0	0	0	0	0	0	0	0	1	0	0	0	-1	0	0						0	0	0	0	1	7	1
2015-08-08 09:59:12	800104268	2		1939-09-10	吉林大学白求恩第一医院	胃肠外科	2015-06-30	-1	0	0	0	0	0	0	0	1	0	0	0	0	0	0	0	0	0	0	0	0	0	0	0	0	0	-1	0	0						0	0	0	0	0	0
2015-09-18 16:05:29	2400100076	1		1941-07-07	西京医院	胃肠外科	2015-07-20	-1	0	0	0	0	0	0	0	0	0	0	0	0	0	0	0	0	0	0	0	0	1	0	0	0	0	-1	0	0						0	0	0	0	0	0
2017-02-04 16:17:59	2400100150	1		1940-01-06	西京医院	胃肠外科	2016-08-05	-1	0	0	0	0	0	0	1	0	0	0	0	0	0	0	0	0	0	0	0	0	0	0	0	0	0	-1	0	0						0	0	0	0	0	0
2017-08-09 10:06:57	1300201647	2	1	1945-04-16	福建省肿瘤医院	干部保健特需病房	2017-07-31	-1	0	0	0	0	0	0	1	1	0	0	0	0	0	0	0	0	0	0	0	0	0	0	0	0	0	4	0	0						0	0	0	0	0	0
2019-11-15 21:52:31	800108999	2	1	1942-10-27	吉林大学白求恩第一医院	肿瘤中心	2019-08-19	-1	0	0	0	0	0	0	0	1	0	0	0	0	0	0	0	0	0	0	1	0	0	1	0	0	0	4	0	0						0	0	0	0	0	0
2016-05-09 11:07:25	3200100329	1		1932-04-01	新疆喀什地区第一人民医院	消化腹部肿瘤外一科	2015-06-11		0	0	0	0	0	0	0	0	0	0	0	0	0	0	0	0	0	0	0	0	0	0	0	0	0		0	0						0	0	0	0	0	0
2016-05-03 10:04:32	1300200212	2		1933-06-06	福建省肿瘤医院	七区 胃肠肿瘤外科	2014-04-04		0	0	0	0	0	0	0	0	0	0	0	0	0	0	0	0	0	0	0	0	0	0	0	0	0		0	0						0	0	0	0	0	0
2016-05-19 15:32:07	400200490	2		1938-01-20	重庆市第三人民医院	普外科	2016-03-24	-1	0	1	0	0	0	0	1	1	0	0	0	0	0	0	0	0	0	0	0	0	0	0	0	0	0	-1	0	0						0	0	0	0	0	0
2016-05-11 10:10:43	1300200940	1		1943-08-03	福建省肿瘤医院	干部保健特需病房	2015-06-23		0	0	0	0	0	0	1	1	0	0	0	0	0	0	0	0	0	0	0	0	0	0	0	0	0		0	0						0	0	0	0	0	0
2016-05-19 13:53:12	500700192	1		1942-11-27	邢台市人民医院	肿瘤内科	2014-07-19	-1	0	0	0	0	0	0	0	0	0	0	0	0	0	0	0	0	0	0	0	0	0	0	0	0	0		0	0						0	0	0	0	0	0
2017-02-21 22:07:51	800105635	1		1939-10-03	吉林大学白求恩第一医院	肿瘤中心	2015-10-25		0	0	0	0	0	0	1	0	0	0	0	0	0	0	0	0	0	0	0	0	0	0	0	0	0	4	0	0						0	0	0	0	0	0
2015-10-03 22:33:22	800104865	2		1943-07-10	吉林大学白求恩第一医院	胃肠外科	2015-07-15	-1	0	0	0	1	0	0	0	0	1	0	0	0	0	0	0	0	1	0	0	0	0	0	0	0	0	-1	0	0						0	0	0	0	0	0
2018-07-19 10:58:14	100900329	1		1947-02-28	首都医科大学附属北京世纪坛医院	肿瘤内科	2018-07-09	-1	0	0	0	0	0	0	0	1	0	0	0	0	0	0	0	0	0	0	0	0	0	0	0	0	0	4	0	0						0	0	0	0	1	2
2016-05-19 13:53:38	500700194	1		1937-07-24	邢台市人民医院	肿瘤内科	2014-01-03	-1	0	0	0	0	0	0	0	0	0	0	0	0	0	0	0	0	0	0	0	0	0	0	0	0	0		0	0						0	0	0	0	0	0
2017-05-24 10:20:54	1300201564	2	1	1942-10-24	福建省肿瘤医院	干部保健特需病房	2017-05-02		0	0	0	0	0	0	0	0	0	0	0	0	0	0	0	0	0	0	0	0	1	0	0	0	0	4	0	0						0	0	0	0	0	0
2017-02-22 15:06:03	800105640	1		1936-03-12	吉林大学白求恩第一医院	肿瘤中心	2015-12-01	-1	0	0	0	0	0	0	0	0	1	1	0	0	0	0	0	0	0	0	0	0	0	0	1	14	50	1	1	7	1		1			7	0	21	0	1	7		1
2014-06-25 21:45:44	800101886	1		1940-02-27	吉林大学白求恩第一医院	胃肠外科	2014-04-06	-1	0	0	0	0	0	0	0	0	0	0	0	0	0	0	0	0	0	0	0	0	0	0	1	7	20	1	0	0						0	0	0	0	0	0
2016-03-25 14:10:17	800105234	2		1936-03-09	吉林大学白求恩第一医院	胃肠外科	2015-07-15		0	0	0	0	0	0	0	0	0	0	0	0	0	0	0	0	0	0	0	0	0	0	1	5	30	1	0	0						0	0	0	0	0	0
2015-03-11 11:01:42	300100192	1		1939-07-26	上海瑞金医院	外科三病区	2014-12-26	-1	0	0	0	0	0	0	0	0	0	0	0	0	0	0	0	0	0	0	0	0	0	0	1	4	40		0	0						0	0	0	0	1	7	1
2016-05-13 15:27:30	1300200151	1		1940-02-26	福建省肿瘤医院	干部保健特需病房	2014-04-22		0	0	0	0	0	0	0	0	0	0	0	0	0	0	0	0	0	0	0	0	0	0	1	7	15	3	0	0						0	0	0	0	0	0
2015-02-04 11:33:42	800103191	1		1940-12-14	吉林大学白求恩第一医院	胃肠外科	2014-07-05	-1	0	0	0	0	0	0	0	0	0	0	0	0	0	0	0	0	0	0	0	0	0	0	1	7	10	3	0	0						0	0	0	0	0	0
2016-05-12 10:13:39	1300201056	1		1942-02-19	福建省肿瘤医院	干部保健特需病房	2015-09-15		0	0	0	0	0	0	0	0	0	0	0	0	0	0	0	0	0	0	0	0	0	0	1	14	30	2	0	0						0	0	0	0	0	0
2016-05-13 15:08:09	1300200018	1		1942-04-24	福建省肿瘤医院	干部保健特需病房	2014-02-18		0	0	0	0	0	0	0	0	0	0	1	0	0	0	0	0	0	0	0	0	0	0	1	7	50	2	1	7	1		1	1		7	0	14	0	1	2		1
2016-05-19 13:46:32	500700175	1		1936-09-12	邢台市人民医院	肿瘤内科	2014-05-23	-1	0	0	0	0	0	0	0	1	1	0	0	0	0	0	0	0	0	0	0	0	0	0	0	0	0		1	1			1			1	0	0	0	0	0
2016-05-06 11:30:09	3200100054	2		1934-03-04	新疆喀什地区第一人民医院	消化腹部肿瘤外一科	2014-06-11		0	0	0	0	0	0	0	0	0	0	0	0	0	0	0	0	0	0	0	0	0	0	0	0	0		0	0						0	0	0	0	0	0
2016-05-14 10:20:56	800102850	1		1934-02-24	吉林大学白求恩第一医院	肿瘤中心	2014-07-28	-1	0	0	0	0	0	0	0	1	0	0	0	0	0	0	0	0	0	0	0	0	0	0	0	0	0	-1	0	0						0	0	0	0	0	0
2014-08-26 09:59:17	800102497	1		1941-04-28	吉林大学白求恩第一医院	胃肠外科	2014-05-15		0	0	0	0	0	0	0	0	0	0	0	0	0	0	0	0	1	0	0	0	0	0	0	0	0	-1	0	0						0	0	0	0	0	0
2016-05-19 13:56:33	500700204	1		1940-09-14	邢台市人民医院	肿瘤内科	2013-12-20	-1	0	0	0	0	0	0	0	0	0	0	0	0	0	0	0	0	0	0	0	0	0	0	0	0	0		0	0						0	0	0	0	0	0
2014-07-02 19:42:45	800101963	2		1927-06-22	吉林大学白求恩第一医院	胃肠外科	2014-04-21		0	0	0	0	0	0	0	1	1	0	0	0	0	0	0	0	0	0	0	0	0	0	0	0	0	-1	0	0						0	0	0	0	0	0
2014-03-28 15:36:53	1900100369	2		1936-12-28	中山大学第一附属医院	胃肠外科	2013-06-04	-1	0	0	0	0	0	0	0	1	1	0	0	0	0	0	0	0	1	0	0	0	0	0	0	0	0	-1	0	0						0	0	0	0	0	0
2015-10-29 17:33:17	2400100091	1		1944-01-01	西京医院	胃肠外科	2015-10-12	-1	0	0	0	0	0	0	0	0	0	0	0	0	0	0	0	0	0	0	0	0	1	0	1	7	50	2	1	3	1					0	0	6	0	1	7	1
2016-05-19 13:51:18	500700186	1		1937-07-26	邢台市人民医院	肿瘤内科	2014-01-02	-1	0	0	0	0	0	0	0	0	0	0	0	0	0	0	0	0	0	0	0	0	0	0	1	4	35	2	0	0						0	0	0	0	0	0
2016-05-19 13:30:12	500700148	1		1935-02-01	邢台市人民医院	肿瘤内科	2014-01-02	-1	0	0	0	0	0	0	0	1	0	0	0	0	0	0	0	0	0	0	0	0	0	0	1	4	30	2	0	0						0	0	0	0	0	0
2016-05-13 08:51:55	1300201216	1		1944-05-18	福建省肿瘤医院	七区 胃肠肿瘤外科	2015-09-18		0	0	0	0	0	0	0	0	0	0	0	0	0	0	0	0	0	0	0	0	0	0	1	1	50	2	0	0						0	0	0	0	0	0
2016-05-20 11:26:19	800101568	1		1933-08-24	吉林大学白求恩第一医院	胃肠外科	2014-03-19		0	0	1	0	0	0	0	0	0	0	0	0	0	0	0	0	0	0	0	0	0	0	1	1	50	1	0	0						0	0	0	0	0	0
2016-09-20 18:23:01	400101496	1		1943-12-09	重庆大坪医院	胃结直肠外科	2016-07-28		0	0	0	1	0	0	0	1	0	0	0	0	0	0	0	0	1	0	0	0	0	0	1	3	20	3	1	3	1					0	0	8	0	0	0
2015-01-06 16:05:12	800103057	1		1927-10-04	吉林大学白求恩第一医院	胃肠外科	2014-08-29		0	0	0	0	0	0	0	0	1	0	0	0	0	0	0	0	0	0	0	0	0	0	1	4	30	1	0	0						0	0	0	0	1	7	1
2016-05-13 08:51:26	1300201214	1		1935-06-10	福建省肿瘤医院	七区 胃肠肿瘤外科	2015-09-15		0	0	0	0	0	0	0	0	0	0	0	0	0	0	0	0	0	0	0	0	0	0	1	7	30	1	1	7	1					0	0	21	0	0	0
2015-04-29 16:49:13	2400100049	2		1943-08-07	西京医院	胃肠外科	2014-12-29	-1	0	0	0	0	0	0	0	1	0	0	0	0	0	0	0	0	0	0	0	0	1	0	0	0	0	-1	0	0						0	0	0	0	0	0
2016-05-14 09:09:16	800102131	1		1938-05-18	吉林大学白求恩第一医院	胃肠外科	2014-03-22		0	0	0	0	0	0	0	0	0	0	0	0	0	0	0	0	0	0	0	0	0	1	0	0	0	-1	0	0						0	0	0	0	0	0
2015-08-14 12:05:55	800104414	1		1941-01-19	吉林大学白求恩第一医院	胃肠外科	2015-06-25		0	0	0	0	0	0	0	0	0	0	0	0	0	0	0	0	0	0	0	0	0	1	0	0	0	-1	0	0						0	0	0	0	0	0
2016-05-13 09:20:31	1300200154	1		1942-10-23	福建省肿瘤医院	七区 胃肠肿瘤外科	2014-04-08		0	0	0	0	0	0	0	1	0	0	0	0	0	0	0	0	0	0	0	0	0	0	0	0	0		0	0						0	0	0	0	1	7	1
2019-12-26 13:46:38	800109904	1		1942-10-20	吉林大学白求恩第一医院	肿瘤中心	2019-10-28	-1	0	0	0	0	0	0	0	0	0	0	0	0	0	0	0	0	0	0	0	0	1	0	0	0	0	4	1	1	1					0	0	10	0	1	7	1
2019-12-17 17:45:55	2800400300	1		1941-03-28	广西医科大学一附院	胃肠腺体外科	2019-03-21	-1	0	0	0	0	0	0	0	0	0	0	0	0	0	0	0	0	0	0	0	0	0	0	0	0	0	4	0	0						0	0	0	0	0	0
2015-03-19 16:19:57	2400100025	1		1938-07-22	西京医院	胃肠外科	2014-12-24	-1	0	0	0	0	0	0	0	0	0	0	0	0	0	0	0	0	0	0	0	0	1	0	1	7	50	2	1	3	1		1	1		0.5	0	0.5	0	1	7	1
2015-10-21 10:25:32	1901300161	1		1939-03-16	佛山市第一人民医院	肿瘤内科	2013-07-15		0	0	0	0	0	0	0	0	0	0	0	0	0	0	0	0	0	0	0	0	0	0	1	10	43	1	0	0						0	0	0	0	1	14	1
2017-02-21 10:05:11	800105581	1		1945-01-08	吉林大学白求恩第一医院	胃肠外科	2016-01-06	-1	0	0	0	0	0	0	0	0	0	0	0	0	0	0	0	0	0	0	0	0	1	0	1	7	20	1	0	0						0	0	0	0	0	0
2016-05-19 13:49:45	500700180	1		1942-01-20	邢台市人民医院	肿瘤内科	2013-08-19	-1	0	0	0	0	0	0	0	0	0	0	0	0	0	0	0	0	0	0	0	0	0	0	1	5	20	2	1	1	1					0	0	3	0	1	2
2018-07-29 12:39:06	100900349	1		1944-06-03	首都医科大学附属北京世纪坛医院	腹膜外科	2018-05-21	-1	0	0	0	0	0	0	0	0	0	0	0	0	0	0	0	0	0	0	0	0	1	0	1	4	40	2	0	0						0	0	0	0	0	0
2018-08-15 11:08:54	100900394	1		1946-05-08	首都医科大学附属北京世纪坛医院	结直肠肿瘤外科	2018-07-31	-1	0	0	0	0	0	0	0	0	0	0	0	0	0	0	0	0	0	0	0	0	1	1	1	2	50	2	0	0						0	0	0	0	0	0
2019-11-25 13:53:33	800109397	1		1946-10-18	吉林大学白求恩第一医院	肿瘤中心	2019-09-26	-1	0	0	0	0	0	0	0	0	0	1	0	0	0	0	0	0	0	0	0	0	0	0	1	7	47	3	0	0						0	0	0	0	0	0
2016-05-10 16:45:25	1300200872	1		1938-10-05	福建省肿瘤医院	干部保健特需病房	2015-03-26		0	0	0	0	0	0	1	1	0	0	0	0	0	0	0	0	0	0	0	0	0	0	1	1	35	3	0	0						0	0	0	0	1	7	1
2015-10-20 11:02:10	400200248	1		1941-01-28	重庆市第三人民医院	肿瘤血液科	2015-09-04		0	0	0	0	0	0	0	0	0	0	0	0	0	0	0	0	0	0	0	0	0	0	1	7	15	3	0	0						0	0	0	0	0	0
2015-08-06 02:21:39	800104171	1		1937-10-04	吉林大学白求恩第一医院	肿瘤中心	2014-09-11		0	0	0	0	0	0	0	0	0	0	0	0	0	0	0	0	0	0	0	0	0	1	1	3	40	1	0	0						0	0	0	0	0	0
2016-05-06 10:26:45	1300200461	1		1937-05-28	福建省肿瘤医院	干部保健特需病房	2014-07-14		0	0	0	0	0	0	0	0	0	0	0	0	0	0	0	0	0	0	0	0	0	1	1	14	12	3	0	0						0	0	0	0	0	0
2015-08-19 23:44:51	800104506	1		1935-07-12	吉林大学白求恩第一医院	胃肠外科	2015-05-07		0	0	0	0	0	0	0	0	0	0	0	0	0	0	0	0	0	0	0	0	0	0	1	7	50	1	0	0						0	0	0	0	0	0
2016-05-19 13:46:51	500700176	1		1941-05-05	邢台市人民医院	肿瘤内科	2013-12-23	-1	0	0	0	0	1	0	0	0	0	0	0	0	0	0	0	0	0	0	0	0	0	0	1	7	30	2	0	0						0	0	0	0	0	0
2018-11-06 12:02:32	1300202561	1		1937-03-24	福建省肿瘤医院	干部保健特需病房	2018-10-15	-1	0	0	0	0	0	0	1	1	1	0	0	0	0	0	0	0	0	0	0	0	0	1	1	7	50	1	1	14					1	0	1.4	0	0	1	7		1
2016-03-09 18:23:55	400101119	1		1940-12-27	重庆大坪医院	胃结直肠外科	2016-01-06	-1	0	0	0	1	0	0	0	0	0	0	0	0	0	0	0	0	0	0	0	0	0	0	1	7	31	3	0	0						0	0	0	0	0	0
2015-05-04 16:03:21	2400100054	1		1937-01-06	西京医院	胃肠外科	2014-11-02	-1	0	0	0	0	0	0	0	0	0	0	0	0	0	0	0	0	0	0	0	0	1	0	0	0	0	-1	0	0						0	0	0	0	0	0
2016-05-16 14:19:36	800102739	2		1938-02-14	吉林大学白求恩第一医院	胃肠外科	2014-06-12	-1	0	0	0	0	0	0	0	0	0	0	0	0	0	0	0	0	0	0	0	0	0	0	0	0	0	-1	0	0						0	0	0	0	0	0
2016-05-10 10:17:44	1300200716	1		1937-06-26	福建省肿瘤医院	三十一区 腹部肿瘤内科	2014-12-15		0	0	0	0	0	0	0	1	0	0	0	0	0	0	0	0	0	0	0	0	0	0	0	0	0		0	0						0	0	0	0	0	0
2016-05-14 09:11:49	800102188	2		1940-09-24	吉林大学白求恩第一医院	胃肠外科	2014-03-30		0	0	0	0	0	0	0	0	0	0	0	0	0	0	0	0	0	0	0	0	0	0	0	0	0	-1	0	0						0	0	0	0	0	0
2015-08-14 11:45:15	800104413	2		1943-01-01	吉林大学白求恩第一医院	胃肠外科	2015-07-06		0	0	0	0	0	0	0	1	0	0	0	0	0	0	0	0	0	0	0	0	0	0	0	0	0	-1	0	0						0	0	0	0	0	0
2016-04-28 15:52:56	400200410	2		1938-12-27	重庆市第三人民医院	普外科	2016-03-14	-1	0	0	0	0	0	0	0	1	0	0	0	0	0	0	0	0	0	0	0	0	0	0	0	0	0	-1	0	0						0	0	0	0	0	0
2017-10-27 09:16:00	1300201828	2	1	1933-11-23	福建省肿瘤医院	干部保健特需病房	2017-10-09		0	0	0	0	0	0	0	0	0	0	0	0	0	0	0	0	0	0	0	0	1	0	0	0	0	4	0	0						0	0	0	0	0	0
2016-05-13 14:51:52	1300201230	1		1939-12-27	福建省肿瘤医院	七区 胃肠肿瘤外科	2015-10-08		0	0	0	0	0	0	0	0	0	0	0	0	0	0	0	0	0	0	0	0	0	0	0	0	0		0	0						0	0	0	0	0	0
2016-03-17 20:10:12	400101046	1		1937-08-10	重庆大坪医院	肿瘤科	2015-12-12	-1	0	0	0	0	0	0	0	0	0	0	0	0	0	0	0	0	0	0	0	0	0	0	0	0	0	-1	0	0						0	0	0	0	0	0
2013-10-15 16:16:15	1900100290	2		1934-08-15	中山大学第一附属医院	胃肠外科	2013-03-19	-1	0	0	0	0	0	0	1	0	0	0	0	0	0	0	0	0	0	0	0	0	0	0	0	0	0	-1	0	0						0	0	0	0	1	5		1
2017-02-21 17:32:17	800105632	1		1940-06-05	吉林大学白求恩第一医院	肿瘤中心	2015-10-26		0	0	0	0	0	0	0	0	0	0	0	0	0	0	0	0	0	0	0	0	1	0	0	0	0	4	0	0						0	0	0	0	0	0
2015-02-03 22:23:50	800103188	1		1934-04-03	吉林大学白求恩第一医院	肿瘤中心	2014-07-24		0	0	0	0	0	0	0	0	0	0	0	0	0	0	0	0	0	0	0	0	0	0	1	14	40	1	0	0						0	0	0	0	0	0
2017-03-28 10:30:19	800105892	1		1935-06-29	吉林大学白求恩第一医院	胃肠外科	2015-12-04	-1	0	0	0	0	0	0	0	0	0	0	0	0	0	0	0	0	0	0	0	0	1	0	1	30	20	3	0	0						0	0	0	0	0	0
2017-02-28 11:43:24	2400100213	1		1935-01-29	西京医院	胃肠外科	2016-06-13	-1	0	0	0	0	0	0	0	0	0	0	0	0	0	0	0	0	0	0	0	0	0	0	1	7	30	2	0	0						0	0	0	0	0	0
2016-05-12 11:36:33	1300201131	1		1930-01-15	福建省肿瘤医院	干部保健特需病房	2015-11-10		0	0	0	0	0	0	0	1	0	0	0	0	0	0	0	0	0	0	0	0	0	0	1	7	27	3	0	0						0	0	0	0	1	14	1	1
2017-11-20 14:51:35	1300201879	1		1936-05-10	福建省肿瘤医院	干部保健特需病房	2017-10-30		0	0	0	0	0	0	0	0	0	0	0	0	0	0	0	0	0	0	0	0	1	0	1	7	50	2	0	0						0	0	0	0	0	0
2014-12-03 17:11:31	2800100689	1		1931-04-22	广西医科大学附属肿瘤医院	胃肠一区	2014-08-28	-1	0	0	0	0	0	0	0	0	0	0	0	0	0	0	0	0	0	0	0	0	0	0	1	7	10	2	1	7				1		0	4	0	0	0	0
2015-08-13 10:01:41	800104389	2		1941-09-22	吉林大学白求恩第一医院	胃肠外科	2015-06-17		0	0	0	0	0	0	0	0	1	0	0	0	0	0	0	0	0	0	0	0	0	0	1	7	55	1	0	0						0	0	0	0	0	0
2016-12-16 11:43:04	1300201440	1		1941-06-28	福建省肿瘤医院	十四区 腹部肿瘤放疗科	2016-10-27		0	0	0	0	0	0	0	0	0	0	0	0	0	0	0	0	0	0	0	0	1	0	1	14	40	1	0	0						0	0	0	0	0	0
2016-05-13 15:22:30	1300200121	1		1938-02-24	福建省肿瘤医院	干部保健特需病房	2014-03-31		0	1	0	0	0	0	0	0	0	0	0	0	0	0	0	0	0	0	0	0	0	1	1	7	30	3	0	0						0	0	0	0	1	7	1
2016-05-13 15:16:51	1300200073	2		1932-08-15	福建省肿瘤医院	干部保健特需病房	2014-03-21		0	0	0	0	0	0	0	1	1	0	0	0	0	0	0	0	0	0	0	0	0	0	0	0	0		0	0						0	0	0	0	0	0
2018-12-25 09:07:43	2300102630	1		1931-06-05	昆明医科大学第一附属医院	普外一科（胃肠与疝外科）	2018-11-29	-1	0	0	0	0	0	0	0	1	0	0	0	0	0	0	0	0	0	0	0	0	0	0	0	0	0	4	0	0						0	0	0	0	0	0
2018-08-10 15:17:14	100900373	2	2	1939-08-08	首都医科大学附属北京世纪坛医院	结直肠肿瘤外科	2018-05-28	-1	0	0	0	0	0	0	0	0	0	0	0	0	0	0	0	0	0	0	0	0	1	0	0	0	0	4	0	0						0	0	0	0	0	0
2016-03-15 15:09:43	1200100665	1		1934-12-24	安徽省肿瘤医院	放二	2016-02-19	-1	0	0	0	0	0	0	0	0	0	0	0	0	0	0	0	0	0	0	0	0	0	0	0	0	0		0	0						0	0	0	0	0	0
2016-05-16 16:44:54	1900101213	1		1937-06-01	中山大学第一附属医院	胃肠外科	2014-12-17		0	0	0	0	0	0	0	0	0	0	0	0	0	0	0	0	0	0	0	0	0	0	0	0	0		0	0						0	0	0	0	1	7	1
2016-06-12 15:25:05	1200100919	2		1944-05-02	安徽省肿瘤医院	肿三	2016-05-31	-1	0	0	0	0	0	0	0	0	0	0	0	0	0	0	0	0	0	0	0	0	0	0	0	0	0	-1	0	0						0	0	0	0	0	0
2015-11-15 22:48:11	800105074	1		1936-01-08	吉林大学白求恩第一医院	胃肠外科	2015-07-29		0	0	0	0	0	0	0	0	0	0	0	0	0	0	0	0	0	0	0	0	0	1	0	0	0	-1	0	0						0	0	0	0	0	0
2016-05-13 15:40:10	1300200181	2		1933-06-21	福建省肿瘤医院	七区 胃肠肿瘤外科	2014-04-02		0	0	0	0	0	0	0	0	0	0	0	0	0	0	0	0	0	0	0	0	0	0	0	0	0		0	0						0	0	0	0	0	0
2016-05-19 10:55:27	500700107	1		1942-07-15	邢台市人民医院	肿瘤内科	2014-09-28	-1	0	0	0	0	0	0	0	0	0	0	0	0	0	0	0	0	0	0	0	0	0	0	1	1	20	2	0	0						0	0	0	0	0	0
2014-06-10 12:12:32	1900100858	1		1929-05-07	中山大学第一附属医院	胃肠外科	2014-04-17		0	0	0	0	0	0	0	1	0	1	0	0	0	0	0	0	0	0	0	0	0	0	1	11	20	2	0	0						0	0	0	0	1	7
2016-05-11 08:59:26	1300200877	1		1929-04-03	福建省肿瘤医院	干部保健特需病房	2015-04-01		0	0	0	0	0	0	0	0	0	0	0	0	0	0	0	0	0	0	0	0	0	0	1	7	50	2	0	0						0	0	0	0	1	7	1
2015-08-03 15:34:02	800104028	1		1921-09-22	吉林大学白求恩第一医院	肿瘤中心	2015-05-27		0	0	0	1	0	0	0	0	0	0	0	0	0	0	0	0	0	0	0	0	0	0	1	1	20	3	0	0						0	0	0	0	0	0
2018-05-09 15:16:38	1300202317	1		1943-09-14	福建省肿瘤医院	干部保健特需病房	2018-05-02	-1	0	0	0	0	0	0	0	0	0	0	0	0	0	0	0	0	0	0	0	0	1	0	1	7	53	1	0	0						0	0	0	0	1	7	1
2016-05-10 16:03:14	1200100382	1		1940-02-08	安徽省肿瘤医院	肿三	2015-10-26	-1	0	0	0	0	0	0	0	1	0	0	0	0	0	0	0	0	0	0	0	0	0	0	1	10	30	3	0	0						0	0	0	0	0	0
2016-05-06 11:19:30	1300200483	1		1937-03-04	福建省肿瘤医院	三十一区 腹部肿瘤内科	2014-07-07		0	0	0	0	0	0	0	0	0	0	0	0	0	0	0	0	0	0	0	0	0	0	1	7	60	2	0	0						0	0	0	0	1	14		1
2016-11-29 19:07:13	400101716	1		1945-08-25	重庆大坪医院	肿瘤科	2016-08-22	-1	0	0	0	0	0	0	0	0	0	0	0	0	0	0	0	0	1	0	0	0	0	0	1	7	50	2	1	4	1					0	0	10	0	0	0
[truncated: 448 more columns]
